# Supplementary material for: Integrating Economic Costs and Biological Traits into Global Conservation Priorities for Carnivores
Source: PLoS One. 2009 Aug 27;4(8):e6807. doi: 10.1371/journal.pone.0006807 (PMC2728536; doi:10.1371/journal.pone.0006807)
Supplement: Table S1 — Priority ecoregions for conserving the World's carnivores included (indicated by “1”) in optimal sets under a minimum-ecoregion scenario, a cost-effective scenario, a highly vulnerable scenario, and a combined scenario - along whit their irrepleceability values. Ecoregion area obtained from [29]. (1.33 MB XLS) [file pone.0006807.s001.xls]

## Sheet: Plan1
Table S1. Priority ecoregions for conserving the world’s carnivores. Ecoregion irreplaceability and presence (indicated by “1”) in optimal sets are shown for four conservation planning scenarios: a minimum-ecoregion scenario, a cost-effective scenario, a highly vulnerable scenario, and a combined scenario. Ecoregion area obtained from [30].
			IRREPLACEABILITY VALUE IN THE SCENARIO					PRESENCE IN THE SCENARIO
ECO_CODE	ECO_NAME	ECO_AREA	MINIMUM ECOREGION	COST-EFFECTIVE	HIGHLY VULNERABLE	COMBINED		MINIMUM ECOREGION	COST-EFFECTIVE	HIGHLY VULNERABLE	COMBINED
AA0123	Sulawesi lowland rain forests	115810	0.5	0.48	0.5	0.5		1	1	1	1
AA0124	Sulawesi montane rain forests	75471.7	0.5	0.52	0.5	0.5		0	0	0	0
AA0201	Lesser Sundas deciduous forests	39280.9	0	0	0	0		0	0	0	0
AT0101	Albertine Rift montane forests	103404	0	0	0	0		0	0	0	0
AT0102	Atlantic Equatorial coastal forests	188821	0	0	0	0		0	0	0	0
AT0103	Cameroonian Highlands forests	37879.5	0.04	0	0.07	0		0	0	0	0
AT0104	Central Congolian lowland forests	412882	0.47	0.45	0.41	0.36		1	0	0	0
AT0106	Cross-Niger transition forests	20628.7	0.01	0.21	0.13	0.14		0	1	0	0
AT0107	Cross-Sanaga-Bioko coastal forests	51839.6	0.04	0	0.09	0		0	0	0	0
AT0108	East African montane forests	65198.8	1	1	1	1		1	1	1	1
AT0109	Eastern Arc forests	23556.1	0	0	0	0		0	0	0	0
AT0110	Eastern Congolian swamp forests	92315.2	0.53	0.55	0.59	0.64		0	1	1	1
AT0111	Eastern Guinean forests	188895	0	0	0	0		0	0	0	0
AT0112	Ethiopian montane forests	247734	0.01	0	0.03	0		0	0	0	0
AT0114	Guinean montane forests	30923.5	0.06	1	0.13	0		0	1	0	0
AT0115	Knysna-Amatole montane forests	3061.33	0.07	0	0	0		0	0	0	0
AT0116	KwaZulu-Cape coastal forest mosaic	17778.8	0.04	0	0	0		0	0	0	0
AT0117	Madagascar lowland forests	111760	1	1	1	1		1	1	1	1
AT0118	Madagascar subhumid forests	198972	0	0	0	0		0	0	0	0
AT0119	Maputaland coastal forest mosaic	30146.1	0.09	0.45	0.07	0		0	0	0	0
AT0121	Mount Cameroon and Bioko montane forests	1141.11	0.07	0	0.07	0		0	0	0	0
AT0122	Niger Delta swamp forests	14343.3	0.01	0	0.03	0		0	0	0	0
AT0123	Nigerian lowland forests	67043.1	0	0	0	0		0	0	0	0
AT0124	Northeastern Congolian lowland forests	531067	1	1	1	1		1	1	1	1
AT0125	Northern Zanzibar-Inhambane coastal forest mosaic	112151	0	0	0	0		0	0	0	0
AT0126	Northwestern Congolian lowland forests	432190	0.02	0	0.07	0		0	0	0	0
AT0128	Southern Zanzibar-Inhambane coastal forest mosaic	146463	0	0	0.02	0		0	0	0	0
AT0129	Western Congolian swamp forests	128060	0	0	0	0		0	0	0	0
AT0130	Western Guinean lowland forests	204226	1	1	1	1		1	1	1	1
AT0202	Madagascar dry deciduous forests	151564	0.51	0.46	0.42	0.42		0	0	0	0
AT0203	Zambezian Cryptosepalum dry forests	38084.8	0	0	0	0		0	0	0	0
AT0701	Angolan Miombo woodlands	657515	0.03	0	0.03	0		0	0	0	0
AT0702	Angolan Mopane woodlands	133028	0	0	0	0		0	0	0	0
AT0704	Central Zambezian Miombo woodlands	1.17932e+06	0.32	0.11	0.34	0.24		0	1	1	0
AT0705	East Sudanian savanna	913702	0.2	1	0.66	0.68		0	1	1	0
AT0706	Eastern Miombo woodlands	482013	0.42	0.7	0.45	0.28		1	0	0	0
AT0707	Guinean forest-savanna mosaic	670790	0.14	0	0.43	0.68		0	0	1	0
AT0708	Itigi-Sumbu thicket	7809.19	0.12	0.11	0.05	0		0	0	0	0
AT0709	Kalahari Acacia-Baikiaea woodlands	334545	0	0	0	0		0	0	0	0
AT0710	Mandara Plateau mosaic	7478.52	0	0	0	0		0	0	0	0
AT0711	Northern Acacia-Commiphora bushlands and thickets	324482	0.08	0.43	0.25	0.32		0	1	1	0
AT0712	Northern Congolian forest-savanna mosaic	705006	0.79	0.31	0.41	0.32		1	0	0	1
AT0713	Sahelian Acacia savanna	3.04245e+06	0.04	0	0.02	0		0	0	0	0
AT0714	Serengeti volcanic grasslands	17947.6	0	0	0	0		0	0	0	0
AT0715	Somali Acacia-Commiphora bushlands and thickets	1.0493e+06	0.83	0	0.4	0.4		1	0	0	1
AT0716	Southern Acacia-Commiphora bushlands and thickets	226770	0.03	0.08	0.03	0		0	0	0	0
AT0717	Southern Africa bushveld	222541	0.18	0	0.16	0		0	0	0	0
AT0718	Southern Congolian forest-savanna mosaic	567187	0	0	0	0		0	0	0	0
AT0719	Southern Miombo woodlands	406913	0	0	0.01	0		0	0	0	0
AT0721	Victoria Basin forest-savanna mosaic	165042	0.04	0	0.05	0		0	0	0	0
AT0722	West Sudanian savanna	1.63186e+06	0.8	0	0.44	0.32		1	0	0	1
AT0723	Western Congolian forest-savanna mosaic	411615	0	0	0	0		0	0	0	0
AT0724	Western Zambezian grasslands	33889.7	0	0	0	0		0	0	0	0
AT0725	Zambezian and Mopane woodlands	471874	0.25	0.55	0.19	0.48		0	1	0	1
AT0726	Zambezian Baikiaea woodlands	263554	0.05	0	0.03	0		0	0	0	0
AT0801	Al Hajar montane woodlands	25485.3	0	0	0	0		0	0	0	0
AT0901	East African halophytics	2625.76	0	0	0	0		0	0	0	0
AT0902	Etosha Pan halophytics	7208.25	0	0	0	0		0	0	0	0
AT0903	Inner Niger Delta flooded savanna	45868.1	0	0	0	0		0	0	0	0
AT0904	Lake Chad flooded savanna	18761.2	0	0	0	0		0	0	0	0
AT0905	Saharan flooded grasslands	178952	0	0	0	0		0	0	0	0
AT0906	Zambezian coastal flooded savanna	19483.7	0	0	0	0		0	0	0	0
AT0907	Zambezian flooded grasslands	152878	0	0	0	0		0	0	0	0
AT0908	Zambezian halophytics	30289.2	0	0	0	0		0	0	0	0
AT1001	Angolan montane forest-grassland mosaic	25418.5	0.03	0	0.07	0.48		0	0	0	1
AT1002	Angolan scarp savanna and woodlands	74054.9	0	0	0	0		0	0	0	0
AT1003	Drakensberg alti-montane grasslands and woodlands	11893.6	0	0	0	0		0	0	0	0
AT1004	Drakensberg montane grasslands, woodlands and forests	201962	0.06	0	0	0		0	0	0	0
AT1005	East African montane moorlands	3273.29	0	0	0	0		0	0	0	0
AT1006	Eastern Zimbabwe montane forest-grassland mosaic	7804.11	0	0	0	0		0	0	0	0
AT1007	Ethiopian montane grasslands and woodlands	244349	0.51	0.48	0.31	0.12		1	1	0	0
AT1008	Ethiopian montane moorlands	25049.1	0.49	0.52	0.69	0.88		0	0	1	1
AT1009	Highveld grasslands	185863	0	0	0	0		0	0	0	0
AT1010	Jos Plateau forest-grassland mosaic	13281.3	0	0	0	0		0	0	0	0
AT1011	Madagascar ericoid thickets	1273.47	0	0	0	0		0	0	0	0
AT1012	Maputaland-Pondoland bushland and thickets	19515	0.1	0	0.15	0.02		0	0	0	0
AT1013	Rwenzori-Virunga montane moorlands	2661.32	0	0	0	0		0	0	0	0
AT1014	South Malawi montane forest-grassland mosaic	10191.4	0	0	0	0		0	0	0	0
AT1015	Southern Rift montane forest-grassland mosaic	33360.4	0	0	0	0		0	0	0	0
AT1201	Albany thickets	17083.5	0.05	0	0.11	0		0	0	0	0
AT1202	Lowland fynbos and renosterveld	32744.1	0.1	0	0.22	0.5		0	0	1	0
AT1203	Montane fynbos and renosterveld	45779.8	0.06	0	0.1	0		1	0	0	0
AT1302	Arabian Peninsula coastal fog desert	82689	0	0	0.01	0		0	0	0	0
AT1303	East Saharan montane xeric woodlands	27774.6	0.01	0	0	0		0	0	0	0
AT1304	Eritrean coastal desert	4576.83	0.03	0	0.03	0.02		0	0	0	0
AT1305	Ethiopian xeric grasslands and shrublands	151869	0.02	0	0.02	0		0	0	0	0
AT1306	Gulf of Oman desert and semi-desert	62297.2	0	0	0	0		0	0	0	0
AT1307	Hobyo grasslands and shrublands	25454.5	0	0	0	0		0	0	0	0
AT1309	Kalahari xeric savanna	586846	0	0	0	0		0	0	0	0
AT1310	Kaokoveld desert	45584.9	0	0	0	0		0	0	0	0
AT1311	Madagascar spiny thickets	43294.4	1	1	1	1		1	1	1	1
AT1312	Madagascar succulent woodlands	79496.4	0.49	0.54	0.58	0.58		1	1	1	1
AT1313	Masai xeric grasslands and shrublands	100505	0.09	0.57	0.35	0.28		0	0	0	0
AT1314	Nama Karoo	350726	0	0	0	0		0	0	0	0
AT1315	Namib desert	80688.9	0	0	0	0		0	0	0	0
AT1316	Namibian savanna woodlands	224903	1	1	1	1		1	1	1	1
AT1319	Somali montane xeric woodlands	62374.8	0	0	0	0		0	0	0	0
AT1320	Southwestern Arabian foothills savanna	273758	0	0	0	0		0	0	0	0
AT1321	Southwestern Arabian montane woodlands	86631.8	0.01	0	0	0		0	0	0	0
AT1322	Succulent Karoo	102585	0	0	0	0		0	0	0	0
AT1401	Central African mangroves	30791.1	0.02	0.48	0.13	0.54		0	0	1	0
AT1402	East African mangroves	16012.9	0	0	0	0		0	0	0	0
AT1403	Guinean mangroves	23418.9	0	0	0	0		0	0	0	0
AT1404	Madagascar mangroves	5188.06	0	0	0	0		0	0	0	0
AT1405	Southern Africa mangroves	992.556	0	0	0	0		0	0	0	0
IM0102	Borneo lowland rain forests	425583	0.09	0.09	0.04	0.02		0	0	0	0
IM0103	Borneo montane rain forests	115078	0.08	0.03	0.12	0.04		0	0	0	0
IM0104	Borneo peat swamp forests	67171.5	0.11	0	0.02	0		1	0	0	0
IM0105	Brahmaputra Valley semi-evergreen forests	56612.7	0	0	0	0		0	0	0	0
IM0106	Cardamom Mountains rain forests	44074.3	0	0	0	0		0	0	0	0
IM0107	Chao Phraya freshwater swamp forests	38858.3	0.03	0	0.03	0.02		0	0	1	0
IM0108	Chao Phraya lowland moist deciduous forests	20337.1	0	0	0.01	0.02		0	0	0	0
IM0109	Chin Hills-Arakan Yoma montane forests	29616.9	0	0	0	0		0	0	0	0
IM0111	Eastern highlands moist deciduous forests	340171	0	0	0	0		0	0	0	0
IM0112	Eastern Java-Bali montane rain forests	15829.3	0.08	0.08	0.06	0.08		0	0	1	0
IM0113	Eastern Java-Bali rain forests	53666.3	0.06	0.11	0.03	0.02		0	0	0	0
IM0114	Greater Negros-Panay rain forests	34855.9	0	0	0	0		0	0	0	0
IM0115	Himalayan subtropical broadleaf forests	38124.7	0	0	0	0		0	0	0	0
IM0116	Irrawaddy freshwater swamp forests	15106.8	0	0	0.03	0		0	0	0	0
IM0117	Irrawaddy moist deciduous forests	137910	0.01	0	0.01	0		0	0	0	0
IM0118	Jian Nan subtropical evergreen forests	662292	0	0	0	0		0	0	0	0
IM0119	Kayah-Karen montane rain forests	119158	0.06	0	0.03	0		0	0	0	0
IM0120	Lower Gangetic Plains moist deciduous forests	253509	0	0	0	0		0	0	0	0
IM0121	Luang Prabang montane rain forests	71585	0	0.5	0.01	0		0	1	0	0
IM0122	Luzon montane rain forests	8272.78	0	0	0	0		0	0	0	0
IM0123	Luzon rain forests	94876.8	0	0	0	0		0	0	0	0
IM0124	Malabar Coast moist forests	35330.6	0	0	0	0		0	0	0	0
IM0126	Meghalaya subtropical forests	41629.3	0	0	0	0		0	0	0	0
IM0127	Mentawai Islands rain forests	6469.63	0	0	0	0		0	0	0	0
IM0128	Mindanao montane rain forests	18120.2	0	0	0	0		0	0	0	0
IM0129	Mindanao-Eastern Visayas rain forests	104667	0	0	0	0		0	0	0	0
IM0131	Mizoram-Manipur-Kachin rain forests	135245	0.01	0	0.02	0		0	0	0	0
IM0132	Myanmar coastal rain forests	66332.2	0	0	0.03	0.02		0	0	0	0
IM0134	North Western Ghats moist deciduous forests	48043.6	0	0	0	0		0	0	0	0
IM0135	North Western Ghats montane rain forests	30824.7	0	0	0	0		0	0	0	0
IM0136	Northern Annamites rain forests	47052.6	0	0.27	0	0.02		0	0	0	0
IM0137	Northern Indochina subtropical forests	435869	0.79	0.23	0.59	0.52		1	0	0	1
IM0138	Northern Khorat Plateau moist deciduous forests	16794.3	0	0	0	0		0	0	0	0
IM0139	Northern Thailand-Laos moist deciduous forests	42010.1	0	0	0.02	0		0	0	0	0
IM0140	Northern Triangle subtropical forests	53773.7	0	0	0	0		0	0	0	0
IM0141	Northern Vietnam lowland rain forests	22521.9	0	0	0	0		0	0	0	0
IM0142	Orissa semi-evergreen forests	22227.6	0	0	0	0		0	0	0	0
IM0143	Palawan rain forests	14278.4	1	1	1	1		1	1	1	1
IM0144	Peninsular Malaysian montane rain forests	17097.5	0.11	0	0.09	0.22		0	0	0	0
IM0145	Peninsular Malaysian peat swamp forests	3610.13	0	0	0	0		0	0	0	0
IM0146	Peninsular Malaysian rain forests	124944	0.05	0	0.15	0.28		0	0	0	0
IM0147	Red River freshwater swamp forests	10724.1	0.02	0.77	0.05	0.04		0	1	0	0
IM0149	South China-Vietnam subtropical evergreen forests	223724	0	0	0	0		0	0	0	0
IM0150	South Western Ghats moist deciduous forests	23675.7	0.51	0.46	0.42	0.42		1	1	0	0
IM0151	South Western Ghats montane rain forests	22545	0.49	0.54	0.58	0.58		0	0	1	1
IM0152	Southern Annamites montane rain forests	46313.5	0	0.77	0.01	0		0	1	0	0
IM0153	Southwest Borneo freshwater swamp forests	36602.9	0.07	0.13	0.07	0.02		0	0	0	0
IM0154	Sri Lanka lowland rain forests	12500.1	0.46	0.25	0.24	0.08		1	1	1	0
IM0155	Sri Lanka montane rain forests	3065.68	0.31	0.39	0.24	0.1		0	0	0	0
IM0156	Sulu Archipelago rain forests	2325.99	0	0	0	0		0	0	0	0
IM0157	Sumatran freshwater swamp forests	17994.6	0.02	0.11	0.08	0.18		0	0	0	1
IM0158	Sumatran lowland rain forests	258288	0.17	0.17	0.09	0.06		0	0	0	0
IM0159	Sumatran montane rain forests	72617.8	0.1	0.21	0.08	0.06		0	0	1	0
IM0160	Sumatran peat swamp forests	87120.5	0.06	0.12	0.11	0.08		0	1	0	0
IM0161	Sundaland heath forests	76205.3	0.08	0.05	0.07	0.04		0	0	0	0
IM0162	Sundarbans freshwater swamp forests	14524.7	0	0	0	0		0	0	0	0
IM0163	Tenasserim-South Thailand semi-evergreen rain forests	96929.7	0.03	0	0.01	0		0	0	0	0
IM0164	Tonle Sap freshwater swamp forests	25925.7	0.01	0	0.02	0.16		0	0	0	0
IM0165	Tonle Sap-Mekong peat swamp forests	29262.5	0	0	0.04	0.22		0	0	0	0
IM0166	Upper Gangetic Plains moist deciduous forests	262643	0	0	0	0		0	0	0	0
IM0167	Western Java montane rain forests	26170.8	0.39	0.4	0.45	0.56		1	1	0	1
IM0168	Western Java rain forests	41480.9	0.47	0.41	0.46	0.34		0	0	0	0
IM0169	Hainan Island monsoon rain forests	15488.8	0	0	0	0		0	0	0	0
IM0170	Nansei Islands subtropical evergreen forests	4063.6	1	1	1	1		1	1	1	1
IM0171	South Taiwan monsoon rain forests	2570.09	0	0	0	0		0	0	0	0
IM0172	Taiwan subtropical evergreen forests	33322.4	0	0	0	0		0	0	0	0
IM0201	Central Deccan Plateau dry deciduous forests	239409	0	0	0	0		0	0	0	0
IM0202	Central Indochina dry forests	318937	0.01	0	0.04	0		0	0	0	0
IM0203	Chhota-Nagpur dry deciduous forests	122134	0	0	0	0		0	0	0	0
IM0204	East Deccan dry-evergreen forests	25432	0	0	0	0		0	0	0	0
IM0205	Irrawaddy dry forests	34987.1	0.01	0	0.01	0		0	0	0	0
IM0206	Khathiar-Gir dry deciduous forests	266386	0	0	0	0		0	0	0	0
IM0207	Narmada Valley dry deciduous forests	169458	0	0	0	0		0	0	0	0
IM0208	Northern dry deciduous forests	58154.1	0	0	0	0		0	0	0	0
IM0209	South Deccan Plateau dry deciduous forests	81925.4	0	0	0	0		0	0	0	0
IM0210	Southeastern Indochina dry evergreen forests	123784	0	0	0	0.02		0	0	0	0
IM0211	Southern Vietnam lowland dry forests	34904.9	0	0	0.03	0.02		0	0	0	0
IM0212	Sri Lanka dry-zone dry evergreen forests	48212.8	0.23	0.36	0.52	0.82		0	0	0	1
IM0301	Himalayan subtropical pine forests	76125.4	0.01	0	0	0		0	0	0	0
IM0303	Northeast India-Myanmar pine forests	9685.49	0	0	0	0		0	0	0	0
IM0304	Sumatran tropical pine forests	2748.02	0	0	0	0		0	0	0	0
IM0401	Eastern Himalayan broadleaf forests	82915.8	0.01	0	0.02	0		0	0	0	0
IM0402	Northern Triangle temperate forests	10708.5	0	0	0	0		0	0	0	0
IM0403	Western Himalayan broadleaf forests	55824.9	0	0	0	0		0	0	0	0
IM0501	Eastern Himalayan subalpine conifer forests	27435.9	0	0	0	0		0	0	0	0
IM0502	Western Himalayan subalpine conifer forests	39650.1	0	0	0	0		0	0	0	0
IM0701	Terai-Duar savanna and grasslands	34523.9	0	0	0.02	0		0	0	0	0
IM0901	Rann of Kutch seasonal salt marsh	27838.7	0	0	0	0		0	0	0	0
IM1001	Kinabalu montane alpine meadows	4320.05	1	1	1	1		1	1	1	1
IM1301	Deccan thorn scrub forests	339068	0	0	0	0		0	0	0	0
IM1302	Indus Valley desert	19479.4	0	0	0	0		0	0	0	0
IM1303	Northwestern thorn scrub forests	487535	0	0	0	0		0	0	0	0
IM1304	Thar desert	238254	0	0	0	0		0	0	0	0
IM1401	Goadavari-Krishna mangroves	6979.78	0	0	0	0		0	0	0	0
IM1402	Indochina mangroves	26762.2	0.01	0	0.01	0		0	0	0	0
IM1403	Indus River Delta-Arabian Sea mangroves	5778.65	0	0	0	0		0	0	0	0
IM1404	Myanmar Coast mangroves	21237.9	0.01	0	0.02	0		0	0	0	0
IM1405	Sunda Shelf mangroves	37279.8	0.06	0.09	0.08	0		0	0	0	0
IM1406	Sundarbans mangroves	20382.9	0	0	0	0		0	0	0	0
NA0201	Sonoran-Sinaloan transition subtropical dry forest	50902.6	0	0	0	0		0	0	0	0
NA0302	Sierra Madre Occidental pine-oak forests	222334	0	0	0	0		0	0	0	0
NA0303	Sierra Madre Oriental pine-oak forests	65496.4	0	0	0	0		0	0	0	0
NA0401	Allegheny Highlands forests	84010.8	0	0	0	0		0	0	0	0
NA0402	Appalachian mixed mesophytic forests	192264	0	0	0	0		0	0	0	0
NA0403	Appalachian-Blue Ridge forests	159343	0	0	0	0		0	0	0	0
NA0404	Central U.S. hardwood forests	296135	0	0	0	0		0	0	0	0
NA0405	East Central Texas forests	52583.2	0	0	0	0		0	0	0	0
NA0406	Eastern forest-boreal transition	348614	0	0.05	0	0		0	0	0	0
NA0407	Eastern Great Lakes lowland forests	116673	0	0.02	0	0		0	0	0	0
NA0408	Gulf of St. Lawrence lowland forests	39515.7	0	0	0	0		0	0	0	0
NA0409	Mississippi lowland forests	112240	0	0	0	0		0	0	0	0
NA0410	New England-Acadian forests	238153	0	0	0.01	0		0	0	0	0
NA0411	Northeastern coastal forests	89778	0	0	0	0		0	0	0	0
NA0412	Ozark Mountain forests	62008.3	0	0	0	0		0	0	0	0
NA0413	Southeastern mixed forests	347724	0	0	0	0		0	0	0	0
NA0414	Southern Great Lakes forests	244828	0	0	0	0		0	0	0	0
NA0415	Upper Midwest forest-savanna transition	166477	0	0	0	0		0	0	0	0
NA0416	Western Great Lakes forests	274721	0	0	0	0		0	0	0	0
NA0417	Willamette Valley forests	14883	0	0	0	0		0	0	0	0
NA0501	Alberta Mountain forests	39932.6	0.01	0	0	0		0	0	0	0
NA0502	Alberta-British Columbia foothills forests	121017	0.02	0.07	0.01	0		0	0	0	0
NA0503	Arizona Mountains forests	109052	0	0	0	0		0	0	0	0
NA0504	Atlantic coastal pine barrens	8975.01	0	0	0	0		0	0	0	0
NA0505	Blue Mountains forests	64844.2	0	0	0.01	0		0	0	0	0
NA0506	British Columbia mainland coastal forests	137750	0	0.08	0	0		0	0	0	0
NA0507	Cascade Mountains leeward forests	46451.4	0	0.06	0	0		0	0	0	0
NA0508	Central and Southern Cascades forests	44950.3	0	0	0	0		0	0	0	0
NA0509	Central British Columbia Mountain forests	72089.9	0	0.04	0.02	0		0	0	0	0
NA0510	Central Pacific coastal forests	73863.3	0	0	0	0		0	0	0	0
NA0511	Colorado Rockies forests	132841	0.07	0.1	0.04	0		0	0	0	0
NA0512	Eastern Cascades forests	55298.6	0	0	0	0		0	0	0	0
NA0513	Florida sand pine scrub	3879.02	0	0	0	0		0	0	0	0
NA0514	Fraser Plateau and Basin complex	137636	0	0.06	0	0		0	0	0	0
NA0515	Great Basin montane forests	5788.2	0	0	0	0		0	0	0	0
NA0516	Klamath-Siskiyou forests	50370	0	0	0.01	0		0	0	0	0
NA0517	Middle Atlantic coastal forests	133597	0	0	0	0		0	0	0	0
NA0518	North Central Rockies forests	246515	0	0.04	0	0		0	0	0	0
NA0519	Northern California coastal forests	13287.1	0	0	0	0		0	0	0	0
NA0520	Northern Pacific coastal forests	60754.9	0.01	0.06	0	0		0	0	0	0
NA0521	Northern transitional alpine forests	25783.1	0	0.02	0	0		0	0	0	0
NA0522	Okanagan dry forests	53495.6	0.01	0.06	0	0		0	0	0	0
NA0523	Piney Woods forests	140797	0	0	0	0		0	0	0	0
NA0524	Puget lowland forests	22605.5	0	0	0	0		0	0	0	0
NA0525	Queen Charlotte Islands	9998.57	0	0	0	0		0	0	0	0
NA0526	Sierra Juarez and San Pedro Martir pine-oak forests	4001.96	0	0	0	0		0	0	0	0
NA0527	Sierra Nevada forests	52871.6	0	0	0	0		0	0	0	0
NA0528	South Central Rockies forests	159693	0.56	0.21	0.76	1		1	1	1	1
NA0529	Southeastern conifer forests	236352	0	0	0	0		0	0	0	0
NA0530	Wasatch and Uinta montane forests	41508.5	0	0	0	0		0	0	0	0
NA0601	Alaska Peninsula montane taiga	48043.3	0	0	0	0		0	0	0	0
NA0602	Central Canadian Shield forests	463345	0.13	0.02	0.01	0		0	0	0	0
NA0603	Cook Inlet taiga	28015.2	0	0	0.03	0		0	0	0	0
NA0604	Copper Plateau taiga	17275.3	0	0	0	0		0	0	0	0
NA0605	Eastern Canadian forests	488587	0.06	0.01	0.02	0		0	0	0	0
NA0606	Eastern Canadian Shield taiga	757250	0.01	0	0	0		0	0	0	0
NA0607	Interior Alaska-Yukon lowland taiga	446261	0	0	0.04	0		0	0	0	0
NA0608	Mid-Continental Canadian forests	369628	0	0.02	0.01	0		0	0	0	0
NA0609	Midwestern Canadian Shield forests	548394	0.05	0.02	0.02	0		0	0	0	0
NA0610	Muskwa-Slave Lake forests	263806	0	0.01	0	0		0	0	0	0
NA0611	Newfoundland Highland forests	16390.6	0.01	0	0.03	0.84		0	0	1	1
NA0612	Northern Canadian Shield taiga	617319	0.02	0	0.05	0		0	0	0	0
NA0613	Northern Cordillera forests	264234	0	0.03	0.01	0		0	0	0	0
NA0614	Northwest Territories taiga	348147	0.01	0	0	0		0	0	0	0
NA0615	South Avalon-Burin oceanic barrens	2035.36	0	0	0	0		0	0	0	0
NA0616	Southern Hudson Bay taiga	375339	0.1	0.07	0.02	0		1	0	0	0
NA0617	Yukon Interior dry forests	62742.2	0	0	0	0		0	0	0	0
NA0701	Western Gulf coastal grasslands	80514.6	0	0	0	0		0	0	0	0
NA0801	California Central Valley grasslands	55084.3	0	0	0	0		0	0	0	0
NA0802	Canadian Aspen forests and parklands	399039	0	0.02	0.02	0		0	0	0	0
NA0803	Central and Southern mixed grasslands	282267	0.04	0.08	0.01	0		0	0	0	0
NA0804	Central forest-grasslands transition	407235	0	0	0	0		0	0	0	0
NA0805	Central tall grasslands	248867	0	0	0	0		0	0	0	0
NA0806	Edwards Plateau savanna	61733.7	0	0	0	0		0	0	0	0
NA0807	Flint Hills tall grasslands	29632.1	0	0	0	0		0	0	0	0
NA0808	Montana Valley and Foothill grasslands	81929	0	0	0	0		0	0	0	0
NA0809	Nebraska Sand Hills mixed grasslands	61212.4	0.05	0.12	0.05	0		0	0	0	0
NA0810	Northern mixed grasslands	219614	0	0	0	0		0	0	0	0
NA0811	Northern short grasslands	640109	0.08	0.15	0.02	0		0	0	0	0
NA0812	Northern tall grasslands	76259.4	0.01	0.01	0	0		0	0	0	0
NA0813	Palouse grasslands	46992.6	0	0.01	0	0		0	0	0	0
NA0814	Texas blackland prairies	50214.8	0	0	0	0		0	0	0	0
NA0815	Western short grasslands	435313	0.04	0.11	0.03	0		0	0	0	0
NA1101	Alaska-St. Elias Range tundra	152718	0	0	0.02	0		0	0	0	0
NA1103	Arctic coastal tundra	98909.4	0	0	0.02	0		0	0	0	0
NA1104	Arctic foothills tundra	130032	0.02	0	0.04	0		0	0	0	0
NA1105	Baffin coastal tundra	9171.51	0	0	0.02	0		0	0	0	0
NA1106	Beringia lowland tundra	151820	0.01	0	0.05	0		0	0	0	0
NA1107	Beringia upland tundra	97952.5	0	0	0	0		0	0	0	0
NA1108	Brooks-British Range tundra	160646	0.01	0	0.06	0		0	0	0	0
NA1109	Davis Highlands tundra	88523	0	0	0	0		0	0	0	0
NA1110	High Arctic tundra	467509	0.03	0	0	0		0	0	0	0
NA1111	Interior Yukon-Alaska alpine tundra	234132	0.01	0	0.01	0		0	0	0	0
NA1112	Kalaallit Nunaat high arctic tundra	306129	0	0	0.02	0		0	0	0	0
NA1113	Kalaallit Nunaat low arctic tundra	172182	0.02	0	0.05	0		0	0	0	0
NA1114	Low Arctic tundra	801765	0	0	0.03	0		0	0	0	0
NA1115	Middle Arctic tundra	1.04024e+06	0.02	0	0	0		0	0	0	0
NA1116	Ogilvie-MacKenzie alpine tundra	209808	0.01	0	0.04	0		0	0	0	0
NA1117	Pacific Coastal Mountain icefields and tundra	107362	0.1	0.01	0.07	0		0	0	0	0
NA1118	Torngat Mountain tundra	32463	0	0	0.06	0		0	0	0	0
NA1201	California coastal sage and chaparral	36249.4	1	1	1	1		1	1	1	1
NA1202	California interior chaparral and woodlands	64627.4	0	0	0	0		0	0	0	0
NA1203	California montane chaparral and woodlands	20406.5	0	0	0	0		0	0	0	0
NA1301	Baja California desert	77590.5	0	0	0	0		0	0	0	0
NA1302	Central Mexican matorral	59194.9	0	0	0	0		0	0	0	0
NA1303	Chihuahuan desert	508892	0	0	0	0		0	0	0	0
NA1304	Colorado Plateau shrublands	326501	0.05	0.11	0.04	0		0	0	0	0
NA1305	Great Basin shrub steppe	336212	0	0	0	0		0	0	0	0
NA1306	Gulf of California xeric scrub	23536.7	0	0	0	0		0	0	0	0
NA1307	Meseta Central matorral	124975	0	0	0	0		0	0	0	0
NA1308	Mojave desert	130647	0	0	0	0		0	0	0	0
NA1309	Snake-Columbia shrub steppe	218533	0	0	0.01	0		0	0	0	0
NA1310	Sonoran desert	222843	0	0	0	0		0	0	0	0
NA1311	Tamaulipan matorral	16236.8	0	0	0	0		0	0	0	0
NA1312	Tamaulipan mezquital	141231	0	0	0	0		0	0	0	0
NA1313	Wyoming Basin shrub steppe	132577	0.11	0.12	0.05	0		0	0	0	0
NT0101	Araucaria moist forests	215673	0	0	0	0		0	0	0	0
NT0102	Atlantic Coast restingas	7850.29	0.01	0	0.02	0		0	0	0	0
NT0103	Bahia coastal forests	109305	0	0	0	0		0	0	0	0
NT0104	Bahia interior forests	229241	0	0.1	0.04	0		0	0	0	0
NT0105	Bolivian Yungas	90229.2	0.09	0.15	0.24	0.76		0	0	0	1
NT0106	Caatinga Enclaves moist forests	4776.27	0	0	0	0		0	0	0	0
NT0107	Caqueta moist forests	183358	0	0	0	0		0	0	0	0
NT0108	Catatumbo moist forests	22752.8	0	0	0	0		0	0	0	0
NT0109	Cauca Valley montane forests	31915.3	0.18	0.22	0.2	0		0	1	0	0
NT0111	Central American Atlantic moist forests	89449.9	0	0	0	0		0	0	0	0
NT0112	Central American montane forests	13251.1	0	0	0	0		0	0	0	0
NT0113	Chiapas montane forests	5758.94	0	0	0	0		0	0	0	0
NT0114	Chimalapas montane forests	2076.66	0	0	0	0		0	0	0	0
NT0115	Choc≤-DariΘn moist forests	73305.1	0	0	0	0		0	0	0	0
NT0117	Cordillera La Costa montane forests	14281.6	0	0	0	0		0	0	0	0
NT0118	Cordillera Oriental montane forests	67577.1	0	0	0	0		0	0	0	0
NT0119	Costa Rican seasonal moist forests	10653.5	0.02	0	0.02	0		0	0	0	0
NT0121	Eastern Cordillera real montane forests	102062	0.19	0	0.29	0.42		0	0	1	1
NT0122	Eastern Panamanian montane forests	3031.21	0	0	0	0		0	0	0	0
NT0124	Guianan Highlands moist forests	145958	0.19	0.32	0.07	0		0	0	0	0
NT0125	Guianan moist forests	476136	0	0	0	0		0	0	0	0
NT0126	Gurupa varzeß	9880.95	0	0	0	0		0	0	0	0
NT0128	Iquitos varzeß	114506	0.13	0.1	0.11	0		0	0	1	0
NT0129	Isthmian-Atlantic moist forests	58358.9	0	0	0.05	0		0	0	0	0
NT0130	Isthmian-Pacific moist forests	29176	0.02	0	0.07	0		0	0	0	0
NT0132	Japurß-Solimoes-Negro moist forests	268444	0	0	0	0		0	0	0	0
NT0133	Juruß-Purus moist forests	241493	0	0	0	0		0	0	0	0
NT0135	Madeira-Tapaj≤s moist forests	716682	0	0	0	0		0	0	0	0
NT0136	Magdalena Valley montane forests	104598	0.23	0.24	0.19	0.26		0	0	0	0
NT0137	Magdalena-Urabß moist forests	76439.9	0	0	0	0		0	0	0	0
NT0138	Maraj≤ varzeß	88305	0	0	0	0		0	0	0	0
NT0139	Maranhπo Babaτu forests	141635	0	0	0	0		0	0	0	0
NT0140	Mato Grosso seasonal forests	412314	0.01	0.2	0.02	0		0	0	0	0
NT0141	Monte Alegre varzeß	66506.1	0	0	0	0		0	0	0	0
NT0142	Napo moist forests	250591	0.16	0.06	0.1	0		0	0	0	0
NT0143	Negro-Branco moist forests	200932	0.12	0	0.1	0		0	0	0	0
NT0144	Northeastern Brazil restingas	10010.9	0	0	0	0		0	0	0	0
NT0145	Northwestern Andean montane forests	80806.1	0.19	0.32	0.22	0.3		1	0	0	0
NT0146	Oaxacan montane forests	7576.92	0	0	0	0		0	0	0	0
NT0147	Orinoco Delta swamp forests	28028.2	0	0	0	0		0	0	0	0
NT0148	Pantanos de Centla	17152.9	0	0	0	0		0	0	0	0
NT0149	Guianan freshwater swamp forests	7690.31	0	0	0	0		0	0	0	0
NT0150	Alto Paranß Atlantic forests	482879	0.64	0.13	0.42	0.18		1	1	1	0
NT0151	Pernambuco coastal forests	17501.7	0	0	0	0		0	0	0	0
NT0152	Pernambuco interior forests	22597.1	0	0	0	0		0	0	0	0
NT0153	Peruvian Yungas	185961	0.05	0	0.08	0		0	0	0	0
NT0154	PetΘn-Veracruz moist forests	148595	0	0	0	0		0	0	0	0
NT0156	Purus varzeß	176760	0	0	0	0		0	0	0	0
NT0157	Purus-Madeira moist forests	173261	0	0	0	0		0	0	0	0
NT0158	Rio Negro campinarana	95986.1	0.17	0	0.11	0		0	0	0	0
NT0159	Santa Marta montane forests	4765.53	0	0	0	0		0	0	0	0
NT0160	Serra do Mar coastal forests	104610	0.01	0	0	0		0	0	0	0
NT0161	Sierra de los Tuxtlas	3890.16	0	0	0	0		0	0	0	0
NT0162	Sierra Madre de Chiapas moist forests	11217.9	0	0	0	0		0	0	0	0
NT0163	Solim⌡es-Japurß moist forests	166931	0	0	0	0		0	0	0	0
NT0164	South Florida rocklands	2070.85	0	0	0	0		0	0	0	0
NT0165	Southern Andean Yungas	75150	0.07	0	0.09	0.02		0	0	0	0
NT0166	Southwest Amazon moist forests	746653	0.17	0.12	0.08	0		0	0	0	0
NT0167	Talamancan montane forests	16274.4	0.98	1	0.93	1		1	1	1	1
NT0168	Tapaj≤s-Xingu moist forests	335099	0	0	0	0		0	0	0	0
NT0169	Pantepui	50675.2	0.2	0.39	0.22	0.14		1	0	0	0
NT0170	Tocantins/Pindare moist forests	192766	0	0	0	0		0	0	0	0
NT0171	Trinidad and Tobago moist forests	4721.99	0	0	0	0		0	0	0	0
NT0173	Uatuma-Trombetas moist forests	470048	0	0	0	0		0	0	0	0
NT0174	Ucayali moist forests	114443	0.23	0.06	0.11	0		1	0	0	0
NT0175	Venezuelan Andes montane forests	29268.9	0	0	0	0		0	0	0	0
NT0176	Veracruz moist forests	68946.4	0	0	0	0		0	0	0	0
NT0177	Veracruz montane forests	4942.45	0	0	0	0		0	0	0	0
NT0178	Western Ecuador moist forests	33954.3	0	0	0	0		0	0	0	0
NT0180	Xingu-Tocantins-Araguaia moist forests	265072	0	0	0	0		0	0	0	0
NT0181	Yucatßn moist forests	69482	1	1	1	1		1	1	1	1
NT0182	Guianan piedmont and lowland moist forests	229836	0.2	0.29	0.18	0.04		0	1	0	0
NT0201	Apure-Villavicencio dry forests	68245.5	0	0	0	0		0	0	0	0
NT0202	Atlantic dry forests	114660	0.01	0.14	0.02	0.02		0	0	0	0
NT0204	Bajφo dry forests	37383.7	0	0	0	0		0	0	0	0
NT0205	Balsas dry forests	62246.6	0	0	0	0		0	0	0	0
NT0206	Bolivian montane dry forests	72779.6	0.11	0.16	0.14	0.2		1	0	0	0
NT0207	Cauca Valley dry forests	7312.8	0	0	0	0		0	0	0	0
NT0209	Central American dry forests	67773.1	0	0	0	0		0	0	0	0
NT0210	Dry Chaco	786790	0.17	0	0.06	0		0	0	0	0
NT0211	Chiapas Depression dry forests	13973.6	0	0	0	0		0	0	0	0
NT0212	Chiquitano dry forests	229767	0.01	0.28	0.01	0.02		0	0	0	0
NT0214	Ecuadorian dry forests	21187.1	0	0	0	0		0	0	0	0
NT0217	Jalisco dry forests	26050.2	1	1	1	1		1	1	1	1
NT0219	Lara-Falc≤n dry forests	16869.9	0	0	0	0		0	0	0	0
NT0220	Lesser Antillean dry forests	907.006	0	0	0	0		0	0	0	0
NT0221	Magdalena Valley dry forests	19548.7	0	0	0	0		0	0	0	0
NT0222	Maracaibo dry forests	30084.6	0	0	0	0		0	0	0	0
NT0223	Mara±≤n dry forests	11322.3	0	0	0	0		0	0	0	0
NT0224	Panamanian dry forests	5087.43	0	0	0	0		0	0	0	0
NT0225	Patφa Valley dry forests	2260.58	0	0	0	0		0	0	0	0
NT0227	Sierra de la Laguna dry forests	3975.05	0	0	0	0		0	0	0	0
NT0228	Sinaloan dry forests	77361.7	0	0	0	0		0	0	0	0
NT0229	Sin· Valley dry forests	24879.3	0	0	0	0		0	0	0	0
NT0230	Southern Pacific dry forests	42281.7	0	0	0	0		0	0	0	0
NT0232	Tumbes-Piura dry forests	41100.2	0.4	0.43	0.5	0.54		0	1	1	0
NT0233	Veracruz dry forests	6615.68	0	0	0	0		0	0	0	0
NT0235	Yucatßn dry forests	49623.2	0	0	0	0		0	0	0	0
NT0302	Belizian pine forests	2821.95	0	0	0	0		0	0	0	0
NT0303	Central American pine-oak forests	110942	0	0	0	0		0	0	0	0
NT0306	Miskito pine forests	18853.8	0	0	0	0		0	0	0	0
NT0307	Sierra de la Laguna pine-oak forests	1061.07	0	0	0	0		0	0	0	0
NT0308	Sierra Madre de Oaxaca pine-oak forests	14298.3	0	0	0	0		0	0	0	0
NT0309	Sierra Madre del Sur pine-oak forests	60973.5	0	0	0	0		0	0	0	0
NT0310	Trans-Mexican Volcanic Belt pine-oak forests	92025.5	0	0	0	0		0	0	0	0
NT0402	Magellanic subpolar forests	164642	0.01	0	0	0		0	0	0	0
NT0404	Valdivian temperate forests	248398	0.62	1	0.7	0.96		1	1	1	1
NT0702	Beni savanna	125589	0.31	0.66	0.6	1		0	1	0	1
NT0703	Campos Rupestres montane savanna	26313	0.01	0.05	0	0		0	0	0	0
NT0704	Cerrado	1.91004e+06	0.32	0.24	0.49	0.8		0	0	0	1
NT0707	Guianan savanna	104494	0.12	0	0.32	0.82		0	0	1	1
NT0708	Humid Chaco	291590	0.02	0.01	0.04	0		0	0	0	0
NT0709	Llanos	375787	0	0	0	0		0	0	0	0
NT0710	Uruguayan savanna	352496	0	0.34	0.02	0		0	0	0	0
NT0801	Espinal	298735	0	0	0	0		0	0	0	0
NT0802	Low Monte	353640	0.02	0	0.03	0		0	0	0	0
NT0803	Humid Pampas	398555	0	0	0.01	0		0	0	0	0
NT0805	Patagonian steppe	576599	0.35	0	0.27	0.04		0	0	0	0
NT0904	Everglades	20028.3	0	0	0	0		0	0	0	0
NT0905	Guayaquil flooded grasslands	2923.88	0	0	0	0		0	0	0	0
NT0906	Orinoco wetlands	5988.45	0	0	0	0		0	0	0	0
NT0907	Pantanal	170501	0	0	0.02	0		0	0	0	0
NT0908	Paranß flooded savanna	37099.3	0	0	0	0		0	0	0	0
NT0909	Southern Cone Mesopotamian savanna	26866.6	0	0	0.01	0		0	0	0	0
NT1001	Central Andean dry puna	254929	0.12	0.1	0.07	0		0	0	1	0
NT1002	Central Andean puna	211478	0.12	0	0.07	0.02		0	0	0	0
NT1003	Central Andean wet puna	116874	0.02	0	0.1	0		0	0	0	0
NT1004	Cordillera Central pßramo	12119.7	0	0	0	0		0	0	0	0
NT1005	Cordillera de Merida pßramo	2797.6	0	0	0	0		0	0	0	0
NT1006	Northern Andean pßramo	29810.5	0.21	0.22	0.1	0.02		0	0	0	0
NT1007	Santa Marta pßramo	1238.66	0	0	0	0		0	0	0	0
NT1008	Southern Andean steppe	124779	0.08	0	0.09	0		0	0	0	0
NT1010	High Monte	116569	0.07	0	0.03	0		0	0	0	0
NT1201	Chilean matorral	148381	0.11	0.59	0.03	0		0	1	0	0
NT1301	Araya and Paria xeric scrub	5260.18	0	0	0	0		0	0	0	0
NT1303	Atacama desert	104903	0	0	0.01	0		0	0	0	0
NT1304	Caatinga	731320	0.01	0.14	0.01	0		0	0	0	0
NT1308	Guajira-Barranquilla xeric scrub	31477.4	0	0	0	0		0	0	0	0
NT1309	La Costa xeric shrublands	68181.5	0	0	0	0		0	0	0	0
NT1312	Motagua Valley thornscrub	2328.41	0	0	0	0		0	0	0	0
NT1313	Paraguana xeric scrub	15909.2	0	0	0	0		0	0	0	0
NT1314	San Lucan xeric scrub	3867.26	0	0	0	0		0	0	0	0
NT1315	Sechura desert	184213	0.6	0.57	0.5	0.46		1	0	0	1
NT1316	Tehuacßn Valley matorral	9861.78	0	0	0	0		0	0	0	0
NT1401	Amazon-Orinoco-Southern Caribbean mangroves	40894.4	0	0	0	0		0	0	0	0
NT1403	Mesoamerican Gulf-Caribbean mangroves	26658.3	0	0	0	0		0	0	0	0
NT1404	Northern Mesoamerican Pacific mangroves	8174.09	0	0	0	0		0	0	0	0
NT1405	South American Pacific mangroves	13460.9	0	0	0	0		0	0	0	0
NT1406	Southern Atlantic mangroves	10025.3	0	0	0	0		0	0	0	0
NT1407	Southern Mesoamerican Pacific mangroves	7826.6	0	0	0	0		0	0	0	0
PA0101	Guizhou Plateau broadleaf and mixed forests	269132	0	0	0	0		0	0	0	0
PA0102	Yunnan Plateau subtropical evergreen forests	239854	0.19	0	0.36	0.44		0	0	1	0
PA0401	Appenine deciduous montane forests	16147.2	0	0	0	0		0	0	0	0
PA0402	Atlantic mixed forests	400447	0	0	0	0		0	0	0	0
PA0404	Balkan mixed forests	224768	0	0	0	0		0	0	0	0
PA0405	Baltic mixed forests	117107	0.01	0	0	0		0	0	0	0
PA0406	Cantabrian mixed forests	79846.5	0	0	0	0		0	0	0	0
PA0407	Caspian Hyrcanian mixed forests	55131.8	0.01	0.05	0	0		0	0	0	0
PA0408	Caucasus mixed forests	170538	0.02	0	0.06	0.02		0	0	0	0
PA0409	Celtic broadleaf forests	210027	0	0	0	0		0	0	0	0
PA0410	Central Anatolian steppe and woodlands	101493	0.02	0	0	0		0	0	0	0
PA0411	Central China loess plateau mixed forests	359867	0	0	0	0		0	0	0	0
PA0412	Central European mixed forests	733978	0	0	0.01	0		0	0	0	0
PA0413	Central Korean deciduous forests	104602	0	0.12	0	0		0	0	0	0
PA0414	Changbai Mountains mixed forests	93437.5	0	0	0	0		0	0	0	0
PA0415	Changjiang Plain evergreen forests	437582	0	0	0	0		0	0	0	0
PA0416	Crimean Submediterranean forest complex	30214.6	0	0	0	0		0	0	0	0
PA0417	Daba Mountains evergreen forests	168170	0	0.01	0	0		0	0	0	0
PA0418	Dinaric Mountains mixed forests	58285.5	0	0	0	0		0	0	0	0
PA0419	East European forest steppe	730128	0	0.01	0.02	0		0	0	0	0
PA0420	Eastern Anatolian deciduous forests	81627.5	0.02	0	0	0		0	0	0	0
PA0421	English Lowlands beech forests	45769.9	0	0	0	0		0	0	0	0
PA0422	Euxine-Colchic broadleaf forests	74512.6	0.02	0	0	0		0	0	0	0
PA0423	Hokkaido deciduous forests	25583	0	0.04	0	0		0	0	0	0
PA0424	Huang He Plain mixed forests	434240	0	0	0	0		0	0	0	0
PA0426	Manchurian mixed forests	505287	0	0	0.02	0		0	0	0	0
PA0427	Nihonkai evergreen forests	21637.2	0.09	0.16	0.05	0.02		0	0	0	0
PA0428	Nihonkai montane deciduous forests	82360	0.43	0.22	0.5	0.5		0	1	1	1
PA0429	North Atlantic moist mixed forests	38835.4	0	0	0	0		0	0	0	0
PA0430	Northeast China Plain deciduous forests	232909	0	0	0	0		0	0	0	0
PA0431	Pannonian mixed forests	307716	0	0	0.01	0		0	0	0	0
PA0432	Po Basin mixed forests	42460.9	0	0	0	0		0	0	0	0
PA0433	Pyrenees conifer and mixed forests	25930.1	0.5	0.22	0.56	0.52		1	1	1	1
PA0434	Qin Ling Mountains deciduous forests	123278	0.13	0.28	0.1	0.08		0	0	0	0
PA0435	Rodope montane mixed forests	31685.3	0	0	0	0		0	0	0	0
PA0436	Sarmatic mixed forests	850317	0.01	0.13	0	0.02		0	0	0	0
PA0437	Sichuan Basin evergreen broadleaf forests	98008.8	0	0	0	0		0	0	0	0
PA0438	South Sakhalin-Kurile mixed forests	12562.5	0	0	0	0		0	0	0	0
PA0439	Southern Korea evergreen forests	14724.5	0	0.06	0	0		0	0	0	0
PA0440	Taiheiyo evergreen forests	138266	0.07	0.19	0.05	0.04		0	0	0	0
PA0441	Taiheiyo montane deciduous forests	41912.9	0.07	0.13	0.06	0.02		0	0	0	0
PA0442	Tarim Basin deciduous forests and steppe	54532.6	0	0	0	0		0	0	0	0
PA0443	Ussuri broadleaf and mixed forests	197954	0	0	0	0		0	0	0	0
PA0444	Western Siberian hemiboreal forests	224488	0	0	0	0		0	0	0	0
PA0445	Western European broadleaf forests	493836	0.02	0	0	0		0	0	0	0
PA0446	Zagros Mountains forest steppe	397569	0.02	0.04	0	0		0	0	0	0
PA0501	Alps conifer and mixed forests	149871	0	0	0	0		0	0	0	0
PA0502	Altai montane forest and forest steppe	142875	0.02	0.03	0.01	0		0	0	0	0
PA0503	Caledon conifer forests	22112.4	0	0	0	0		0	0	0	0
PA0504	Carpathian montane forests	125335	0	0	0.01	0		0	0	0	0
PA0505	Da Hinggan-Dzhagdy Mountains conifer forests	249275	0	0	0	0		0	0	0	0
PA0506	East Afghan montane conifer forests	20071.1	0	0.01	0.01	0		0	0	0	0
PA0507	Elburz Range forest steppe	63287.3	0.04	0.02	0	0		0	0	0	0
PA0508	Helanshan montane conifer forests	24704	0.01	0	0	0		0	0	0	0
PA0509	Hengduan Mountains subalpine conifer forests	99290.9	0.01	0.02	0	0		0	0	0	0
PA0510	Hokkaido montane conifer forests	45852.8	0	0.14	0.01	0		0	0	0	0
PA0511	Honshu alpine conifer forests	11504.5	0.34	0.12	0.33	0.42		1	0	0	0
PA0512	Khangai Mountains conifer forests	2901.9	0	0	0	0		0	0	0	0
PA0513	Mediterranean conifer and mixed forests	23091.1	0	0	0	0		0	0	0	0
PA0514	Northeastern Himalayan subalpine conifer forests	46220.2	0	0	0	0		0	0	0	0
PA0515	Northern Anatolian conifer and deciduous forests	101410	0.01	0	0	0		0	0	0	0
PA0516	Nujiang Langcang Gorge alpine conifer and mixed forests	82699	0	0	0	0		0	0	0	0
PA0517	Qilian Mountains conifer forests	16653.1	0.02	0	0.03	0.04		0	0	0	0
PA0518	Qionglai-Minshan conifer forests	80133.7	0.37	0.36	0.22	0.24		1	0	1	0
PA0519	Sayan montane conifer forests	358833	0	0	0	0		0	0	0	0
PA0520	Scandinavian coastal conifer forests	19401.4	0.02	0	0.04	0.02		0	0	0	0
PA0521	Tian Shan montane conifer forests	27567.8	0.01	0	0	0		0	0	0	0
PA0601	East Siberian taiga	3.92255e+06	0.06	0.02	0.02	0		0	0	0	0
PA0602	Iceland boreal birch forests and alpine tundra	92077.4	0	0.1	0	0		0	1	0	0
PA0603	Kamchatka-Kurile meadows and sparse forests	147064	0	0	0	0		0	0	0	0
PA0604	Kamchatka-Kurile taiga	15293.7	0	0	0	0		0	0	0	0
PA0605	Northeast Siberian taiga	1.13326e+06	0.02	0.04	0.06	0.02		0	0	0	0
PA0606	Okhotsk-Manchurian taiga	403504	0	0	0	0		0	0	0	0
PA0607	Sakhalin Island taiga	68943.7	0	0	0	0		0	0	0	0
PA0608	Scandinavian and Russian taiga	2.17029e+06	0.05	0.16	0.02	0.02		0	0	0	0
PA0609	Trans-Baikal conifer forests	201186	0	0	0	0		0	0	0	0
PA0610	Ural montane forests and tundra	175548	0.01	0.14	0.01	0.06		0	0	0	0
PA0611	West Siberian taiga	1.68024e+06	0.03	0.17	0	0		0	0	0	0
PA0801	Alai-Western Tian Shan steppe	127683	0	0	0	0		0	0	0	0
PA0802	Altai steppe and semi-desert	83191.9	0	0	0	0		0	0	0	0
PA0803	Central Anatolian steppe	24934.2	0.01	0	0.01	0		0	0	0	0
PA0804	Daurian forest steppe	209634	0	0	0	0		0	0	0	0
PA0805	Eastern Anatolian montane steppe	168382	0.01	0	0.01	0		0	0	0	0
PA0806	Emin Valley steppe	65134.5	0	0	0	0		0	0	0	0
PA0808	Gissaro-Alai open woodlands	168156	0.02	0	0	0		0	0	0	0
PA0809	Kazakh forest steppe	422308	0.01	0	0.01	0		0	0	0	0
PA0810	Kazakh steppe	807557	0	0	0	0		0	0	0	0
PA0811	Kazakh upland	72199.5	0	0	0	0		0	0	0	0
PA0812	Middle East steppe	132288	0	0	0	0		0	0	0	0
PA0813	Mongolian-Manchurian grassland	889460	0	0	0	0		0	0	0	0
PA0814	Pontic steppe	997073	0	0.01	0	0		0	0	0	0
PA0815	Sayan Intermontane steppe	34057	0	0	0	0		0	0	0	0
PA0816	Selenge-Orkhon forest steppe	228369	0.01	0.04	0.01	0		0	0	0	0
PA0817	South Siberian forest steppe	162600	0.02	0.04	0	0		0	0	0	0
PA0818	Tian Shan foothill arid steppe	129231	0	0	0	0		0	0	0	0
PA0901	Amur meadow steppe	123622	0	0	0	0		0	0	0	0
PA0902	Bohai Sea saline meadow	11564.9	0	0	0	0		0	0	0	0
PA0903	Nenjiang River grassland	23259.8	0	0	0	0		0	0	0	0
PA0904	Nile Delta flooded savanna	50952.5	0.01	0	0.07	0		0	0	0	0
PA0905	Saharan halophytics	53853.7	0	0	0.03	0.04		0	0	0	0
PA0906	Tigris-Euphrates alluvial salt marsh	35572.8	0	0	0	0		0	0	0	0
PA0907	Suiphun-Khanka meadows and forest meadows	33836.4	0	0	0	0		0	0	0	0
PA0908	Yellow Sea saline meadow	5319.73	0	0	0	0		0	0	0	0
PA1001	Altai alpine meadow and tundra	90434.4	0.01	0.09	0	0		0	0	0	0
PA1002	Central Tibetan Plateau alpine steppe	629190	0.05	0.01	0.03	0.04		0	0	0	0
PA1003	Eastern Himalayan alpine shrub and meadows	121014	0	0	0	0		0	0	0	0
PA1004	Ghorat-Hazarajat alpine meadow	66482	0.14	0.19	0.36	0.96		0	0	1	1
PA1005	Hindu Kush alpine meadow	28268.5	0	0.02	0	0		0	0	0	0
PA1006	Karakoram-West Tibetan Plateau alpine steppe	143265	0.01	0	0.01	0		0	0	0	0
PA1007	Khangai Mountains alpine meadow	37167.8	0	0.01	0	0		0	0	0	0
PA1008	Kopet Dag woodlands and forest steppe	58318.6	0.04	0.17	0.03	0		0	0	0	0
PA1009	Kuh Rud and Eastern Iran montane woodlands	126224	0.09	0.11	0.01	0		0	1	0	0
PA1010	Mediterranean High Atlas juniper steppe	6327.65	0	0	0	0		0	0	0	0
PA1011	North Tibetan Plateau-Kunlun Mountains alpine desert	374494	0	0	0	0		0	0	0	0
PA1012	Northwestern Himalayan alpine shrub and meadows	49389.8	0	0	0	0		0	0	0	0
PA1013	Ordos Plateau steppe	215604	0	0	0	0		0	0	0	0
PA1014	Pamir alpine desert and tundra	118025	0.01	0	0.01	0		0	0	0	0
PA1015	Qilian Mountains subalpine meadows	73285.5	0.05	0.01	0.04	0		0	0	0	0
PA1016	Sayan Alpine meadows and tundra	81212.7	0	0	0	0		0	0	0	0
PA1017	Southeast Tibet shrublands and meadows	460542	0.35	0.33	0.46	0.6		0	1	0	1
PA1018	Sulaiman Range alpine meadows	23849.6	0.1	0	0.07	0		1	0	0	0
PA1019	Tian Shan montane steppe and meadows	280611	0.01	0	0	0		0	0	0	0
PA1020	Tibetan Plateau alpine shrublands and meadows	271999	0.01	0	0.02	0		0	0	0	0
PA1021	Western Himalayan alpine shrub and Meadows	70090.4	0	0	0	0		0	0	0	0
PA1022	Yarlung Tsangpo arid steppe	59380.7	0	0	0	0		0	0	0	0
PA1101	Arctic desert	162810	0.01	0	0	0		0	0	0	0
PA1102	Bering tundra	477269	0	0	0	0.02		0	0	0	0
PA1103	Cherskii-Kolyma mountain tundra	560461	0.02	0.02	0.03	0		0	0	0	0
PA1104	Chukchi Peninsula tundra	300485	0	0.04	0.02	0		0	0	0	0
PA1105	Kamchatka Mountain tundra and forest tundra	119889	0	0	0	0		0	0	0	0
PA1106	Kola Peninsula tundra	59185.4	0.01	0	0	0		0	0	0	0
PA1107	Northeast Siberian coastal tundra	224278	0	0	0.01	0		0	0	0	0
PA1108	Northwest Russian-Novaya Zemlya tundra	286282	0.01	0.03	0	0		0	0	0	0
PA1110	Scandinavian Montane Birch forest and grasslands	244865	0.02	0	0.03	0		0	0	0	0
PA1111	Taimyr-Central Siberian tundra	962154	0.02	0.01	0	0		0	0	0	0
PA1112	Trans-Baikal Bald Mountain tundra	218608	0.07	0.01	0	0		0	0	0	0
PA1113	Wrangel Island arctic desert	7599.86	0	0	0	0		0	0	0	0
PA1114	Yamal-Gydan tundra	415131	0	0.02	0.05	0		0	0	0	0
PA1201	Aegean and Western Turkey sclerophyllous and mixed forests	133558	0	0	0	0		0	0	0	0
PA1202	Anatolian conifer and deciduous mixed forests	86392.7	0.01	0	0.04	0		0	0	0	0
PA1204	Corsican montane broadleaf and mixed forests	3633.65	0	0	0	0		0	0	0	0
PA1205	Crete Mediterranean forests	8192.5	0	0	0	0		0	0	0	0
PA1207	Eastern Mediterranean conifer-sclerophyllous-broadleaf forests	143853	0.01	0	0	0		0	0	0	0
PA1208	Iberian conifer forests	34460.9	0	0	0	0		0	0	0	0
PA1209	Iberian sclerophyllous and semi-deciduous forests	297956	0.42	0.27	0.34	0.36		0	0	0	0
PA1210	Illyrian deciduous forests	40638.9	0	0	0	0		0	0	0	0
PA1211	Italian sclerophyllous and semi-deciduous forests	102225	0	0	0	0		0	0	0	0
PA1212	Mediterranean acacia-argania dry woodlands and succulent thickets	99975	0	0	0	0		0	0	0	0
PA1213	Mediterranean dry woodlands and steppe	292082	0.03	0.33	0.08	0.04		0	0	0	0
PA1214	Mediterranean woodlands and forests	358243	0	0	0	0		0	0	0	0
PA1215	Northeastern Spain and Southern France Mediterranean forests	90850.9	0	0	0	0		0	0	0	0
PA1216	Northwest Iberian montane forests	57405.9	0.04	0.21	0.05	0.04		0	0	0	0
PA1217	Pindus Mountains mixed forests	39583.8	0	0	0	0		0	0	0	0
PA1218	South Appenine mixed montane forests	13094.8	0	0	0	0		0	0	0	0
PA1219	Southeastern Iberian shrubs and woodlands	2867.85	0	0	0	0		0	0	0	0
PA1220	Southern Anatolian montane conifer and deciduous forests	76475.4	0.01	0	0	0		0	0	0	0
PA1221	Southwest Iberian Mediterranean sclerophyllous and mixed forests	71123.3	0.04	0.3	0.05	0.08		0	0	0	0
PA1222	Tyrrhenian-Adriatic Sclerophyllous and mixed forests	85084	0	0	0	0		0	0	0	0
PA1301	Afghan Mountains semi-desert	13682.5	0	0.01	0	0		0	0	0	0
PA1302	Alashan Plateau semi-desert	674352	0.04	0.01	0.1	0		0	0	0	0
PA1303	Arabian Desert and East Sahero-Arabian xeric shrublands	1.84746e+06	0.02	0	0	0		0	0	0	0
PA1304	Atlantic coastal desert	39887.3	0	0	0	0		0	0	0	0
PA1305	Azerbaijan shrub desert and steppe	64089.4	0	0	0.03	0		0	0	0	0
PA1306	Badghyz and Karabil semi-desert	133647	0	0.01	0	0		0	0	0	0
PA1307	Baluchistan xeric woodlands	288424	0.09	0	0.04	0		0	0	0	0
PA1308	Caspian lowland desert	267976	0	0	0	0		0	0	0	0
PA1309	Central Afghan Mountains xeric woodlands	139333	0.1	0.18	0.16	0		0	0	0	0
PA1310	Central Asian northern desert	663853	0	0	0	0		0	0	0	0
PA1311	Central Asian riparian woodlands	88799.9	0.02	0	0	0		0	0	0	0
PA1312	Central Asian southern desert	567376	0	0	0.01	0		0	0	0	0
PA1313	Central Persian desert basins	580655	0.07	0.05	0.06	0		0	0	0	0
PA1314	Eastern Gobi desert steppe	282368	0	0.02	0.01	0		0	0	0	0
PA1315	Gobi Lakes Valley desert steppe	139714	0.01	0.01	0	0		0	0	0	0
PA1316	Great Lakes Basin desert steppe	157706	0.01	0.03	0.01	0		0	0	0	0
PA1317	Junggar Basin semi-desert	304938	0	0	0	0		0	0	0	0
PA1318	Kazakh semi-desert	680441	0	0	0	0		0	0	0	0
PA1319	Kopet Dag semi-desert	26285.6	0	0	0	0		0	0	0	0
PA1320	Mesopotamian shrub desert	210908	0.01	0	0	0		0	0	0	0
PA1321	North Saharan steppe and woodlands	1.67378e+06	0.96	0.67	0.85	0.96		1	1	1	1
PA1322	Paropamisus xeric woodlands	92608.7	0	0.03	0	0		0	0	0	0
PA1323	Persian Gulf desert and semi-desert	72517.6	0	0	0	0		0	0	0	0
PA1324	Qaidam Basin semi-desert	192147	0	0	0	0		0	0	0	0
PA1325	Red Sea Nubo-Sindian tropical desert and semi-desert	649658	0.04	0	0.01	0		0	0	0	0
PA1326	Registan-North Pakistan sandy desert	276999	0.05	0.14	0.1	0.02		0	0	0	0
PA1327	Sahara desert	4.62942e+06	0	0	0.03	0		0	0	0	0
PA1328	South Iran Nubo-Sindian desert and semi-desert	350889	0.01	0.05	0	0		0	0	0	0
PA1329	South Saharan steppe and woodlands	1.09825e+06	0	0.09	0.01	0		0	0	0	0
PA1330	Taklimakan desert	742657	0.02	0	0	0		0	0	0	0
PA1331	Tibesti-Jebel Uweinat montane xeric woodlands	82009.4	0	0.24	0	0		0	0	0	0
PA1332	West Saharan montane xeric woodlands	257450	0	0	0.07	0		0	0	0	0
PA1333	Red Sea coastal desert	59196.6	0.02	0	0.03	0		0	0	0	0

## Sheet: Plan2
				1	2	3	4	5	6	7	8	9	10	11	12	13	14	15	16	17	18	19	20	21	22	23	24	25	26	27	28	29	30	31	32	33	34	35	36	37	38	39	40	41	42	43	44	45	46
	sqkm	#			Km	Km	Long	Long	Lat	Lat	index	Long	Lat	#	#	#	#	sum	#	#	#	#	#	#	#	#	sum	sum	end_nr/rich					meters	meters	meters	meters	meters	meters	deg/yr	deg/yr	deg/yr	deg/yr	deg/yr	deg/yr	deg/yr	mm/yr	mm/yr	mm/yr
ECO_CODE	SUM_AREA	BIOME	ECO_NAME	REALM	MAX_WID	MAX_HEIG	MAX_LEF	MAX_RIG	MAX_BOT	MAX_TOP	NE_RATIO	X_LONG	Y_LAT	Rich_amp	Rich_rep	Rich_mam	Rich_avi	Tot_rich	end_str_amp	end_str_rep	end_str_mam	end_str_avi	end_nr_amp	end_nr_rep	end_nr_avi	end_nr_mam	Tot_str_end	Tot_nr_end	amp_end_p	rep_end_p	mam_end_p	avi_end_p	tot_end_p	ELEV_MIN	ELEV_MAX	ELEV_RNG	ELEV_AVG	ELEV_STD	ELEV_MED	T_MIN_MIN	T_MAX_MIN	T_MIN_MAX	T_MAX_MAX	T_AVG	T_STD	T_RNG	PP_MIN_MIN	PP_MAX_MIN	PP_MIN_MAX
AA0101	2098.54	1	Admiralty Islands lowland rain forests	AA	103	33	147.74	147.88	-1.4	-1.37	0.320388	146.97	-2.1	0	0	18	64	82	0	0	2	4	0	0	13	5	6	18	0	0	0.722222	0.078125	0.219512	1	666	665	90.4357	105.299	37	24.7	26.6	25.6	27.6	26.85	0.52	2.9	255.7	336.8	282.8
AA0102	7495.75	1	Banda Sea Islands moist deciduous forests	AA	100	103	132.84	133.2	-5.39	-5.27	1.03	131.53	-7.56	0	0	22	225	247	0	0	1	10	0	0	43	3	11	46	0	0	1.95455	0.0133333	0.186235	1	832	831	72.4108	123.419	14	23.5	25.3	26.1	27.6	26.02	0.58	4.1	15.6	296.6	89.1
AA0103	2809.65	1	Biak-Numfoor rain forests	AA	113	66	136.59	136.61	-1.14	-0.63	0.584071	135.88	-0.92	0	0	29	107	136	0	0	4	6	0	0	13	5	10	18	0	0	0.448276	0.046729	0.132353	1	962	961	121.071	147.391	63	25.5	26.1	26.8	27.4	26.61	0.18	1.9	164.2	270.5	200.4
AA0104	8585.79	1	Buru rain forests	AA	141	87	127.14	127.27	-3.85	-3.06	0.617021	126.63	-3.49	0	0	25	178	203	0	0	0	6	0	0	29	4	6	33	0	0	1.16	0.0224719	0.162562	1	2664	2663	575.976	443.475	503	20.3	21.1	26.6	27.3	24.64	0.2	7	97.5	386.6	116.7
AA0105	171230	1	Central Range montane rain forests	AA	1253	517	135.05	146.37	-7.53	-2.89	0.41261	140.71	-5.21	0	0	90	348	438	0	0	8	4	0	0	55	44	12	99	0	0	0.611111	0.126437	0.226027	1	3890	3889	1464.41	736.526	1487	12.4	14.4	26	27.8	21.33	0.46	15.4	70.4	215.1	502.9
AA0106	26744.5	1	Halmahera rain forests	AA	166	351	129.57	129.64	2.32	2.65	2.11446	128.14	0.65	0	0	38	223	261	0	0	1	12	0	0	43	8	13	51	0	0	1.13158	0.0358744	0.195402	1	2075	2074	250.006	222.132	171	23.4	24.1	26.4	27.1	25.37	0.19	3.7	113	207.2	149.7
AA0107	16449.6	1	Huon Peninsula montane rain forests	AA	269	148	145.43	147.86	-6.75	-5.41	0.550186	146.65	-6.08	0	0	80	370	450	0	0	0	1	0	0	16	6	1	22	0	0	0.2	0.0162162	0.0488889	1	3585	3584	1166.77	783.916	957	15.3	17.3	25	26.5	21.68	0.66	11.2	70.5	256.3	266.5
AA0108	2406.68	1	Yapen rain forests	AA	165	35	136.97	137.07	-1.53	-1.47	0.212121	136.08	-1.72	0	0	37	147	184	0	0	0	0	0	0	2	1	0	3	0	0	0.0540541	0.00680272	0.0163043	1	1426	1425	274.606	265.769	220	23.9	24.6	25.9	26.9	25.36	0.24	3	207.1	322.3	224.2
AA0109	14.3529	1	Lord Howe Island subtropical forests	AA	5	9	159.04	159.1	-31.6	-31.52	1.8	159.09	-31.56	0	2	1	29	32	0	0	0	1	0	1	2	0	1	3	0	0.5	2	0	0.09375	1	103	102	8.42857	26.2344	1	0	0	0	0	0	0	0	0	0	0
AA0110	1607.56	1	Louisiade Archipelago rain forests	AA	65	36	154	154.3	-10.66	-10.53	0.553846	153.49	-11.48	0	0	24	100	124	0	0	0	2	0	0	7	3	2	10	0	0	0.291667	0.03	0.0806452	1	765	764	83.2763	123.26	10	25.4	27.2	25.6	27.5	26.6	0.71	2.1	102	262	102
AA0111	34915.6	1	New Britain-New Ireland lowland rain forests	AA	453	255	154.19	154.24	-1.6	-1.35	0.562914	151.11	-5.22	0	0	47	185	232	0	0	0	8	0	0	55	9	8	64	0	0	1.17021	0.0486486	0.275862	1	1797	1796	237.216	182.026	232	22.7	24.1	26.9	27.4	25.75	0.27	4.7	129.9	241.4	377.6
AA0112	12081.2	1	New Britain-New Ireland montane rain forests	AA	148	103	152.55	153	-3.44	-3.26	0.695946	151.42	-5.48	0	0	45	103	148	0	0	0	2	0	0	30	8	2	38	0	0	0.666667	0.0776699	0.256757	1	2280	2279	862.42	338.059	857	20	21.1	25.1	25.8	23.56	0.3	5.8	151.5	307.2	325.7
AA0113	14522.8	1	New Caledonia rain forests	AA	304	242	167.81	168.15	-19.6	-19.55	0.796053	165.57	-21.31	0	0	9	90	99	0	0	1	4	0	0	31	6	5	37	0	0	3.44444	0.0666667	0.373737	1	1563	1562	370.755	267.262	321	16.3	23	20.8	26.3	22.01	2.31	10	50.7	153.5	89.2
AA0114	41.5717	1	Norfolk Island subtropical forests	AA	9	9	167.91	168	-29.08	-29	1	167.95	-29.04	0	2	1	42	45	0	0	0	1	0	1	5	0	1	6	0	0.5	5	0	0.133333							0	0	0	0	0	0	0	0	0	0
AA0115	134636	1	Northern New Guinea lowland rain and freshwater swamp forests	AA	1232	607	145	147.07	-3.24	-1.54	0.492695	143.25	-4.28	0	0	78	359	437	0	0	2	3	0	0	17	13	5	30	0	0	0.217949	0.0362117	0.0686499	1	1641	1640	205.159	152.044	191	20.9	24.1	26.9	28	26.37	0.32	7.1	66.3	184.9	297.6
AA0116	23183.7	1	Northern New Guinea montane rain forests	AA	378	109	145.14	145.65	-2.73	-2.3	0.28836	139.42	-2.79	0	0	51	264	315	0	0	3	0	0	0	12	6	3	18	0	0	0.235294	0.0227273	0.0571429	1	2115	2114	558.46	297.117	555	21.3	22.4	25.9	27.7	24.83	0.38	6.4	96.3	201	229.5
AA0117	32595.7	1	Queensland tropical rain forests	AA	185	436	150.31	150.83	-18.49	-15.51	2.35676	145.73	-17.47	59	157	101	375	692	12	9	7	3	23	37	16	16	31	92	0.389831	0.235669	0.158416	0.0426667	0.132948	1	1551	1550	314.083	261.849	258	14.4	23.9	22.7	28.3	22.65	3.17	13.9	13.7	167.7	79.4
AA0118	19275.9	1	Seram rain forests	AA	338	122	131.72	131.76	-3.04	-2.78	0.360947	129.35	-3.33	0	0	38	213	251	0	0	4	8	0	0	33	9	12	42	0	0	0.868421	0.0422535	0.167331	1	2991	2990	295.136	319.989	171	21.5	22.5	26.4	27.3	25.33	0.32	5.8	107.3	197.8	156.3
AA0119	35699.7	1	Solomon Islands rain forests	AA	160	209	162.46	162.5	-5.56	-5.01	1.30625	155.24	-5.94	0	0	47	198	245	0	0	13	32	0	0	89	25	45	114	0	0	1.89362	0.126263	0.465306	1	2679	2678	298.954	313.927	233	20.7	21.7	26.7	27.5	25.71	0.39	6.8	91.8	259.8	280
AA0120	77034.3	1	Southeastern Papuan rain forests	AA	559	441	150.69	150.87	-7.43	-6.74	0.788909	148.32	-8.72	0	0	138	509	647	0	0	4	0	0	0	40	28	4	68	0	0	0.289855	0.0550098	0.1051	1	3640	3639	784.844	733.864	570	13.9	16.4	25.8	27.9	23.59	0.75	14	38.6	185.7	286.7
AA0121	99492.7	1	Southern New Guinea freshwater swamp forests	AA	562	367	145.79	146.67	-2.3	-1.1	0.653025	138.58	-7.48	0	0	50	339	389	0	0	0	0	0	0	11	6	0	17	0	0	0.22	0.0176991	0.0437018	1	482	481	39.9569	53.7145	16	23.8	26	26.8	28.1	26.48	0.64	4.3	32.8	224.7	326.3
AA0122	122338	1	Southern New Guinea lowland rain forests	AA	901	447	143.49	145.86	-7.96	-4.22	0.496115	140.6	-6.23	0	0	70	344	414	0	0	0	0	0	0	5	13	0	18	0	0	0.0714286	0.0377907	0.0434783	1	878	877	112.224	124.804	73	22.1	24	26.1	27.7	26.11	0.55	5.6	19.7	239.9	469.5
AA0123	115810	1	Sulawesi lowland rain forests	AA	722	830	149.65	149.7	4.73	4.78	1.14958	121.05	-1.97	0	0	104	337	441	0	0	10	19	0	0	70	28	29	98	0	0	0.673077	0.0830861	0.222222	1	2002	2001	218.951	200.78	152	22.1	23.6	26.8	27.8	25.53	0.3	5.7	20.4	109.3	162.6
AA0124	75471.7	1	Sulawesi montane rain forests	AA	434	448	124.32	125.04	1.01	1.49	1.03226	120.12	-2.42	0	0	102	168	270	0	0	12	9	0	0	44	33	21	77	0	0	0.431373	0.196429	0.285185	1	3383	3382	1034.05	519.361	939	16.4	17.5	25.9	27.1	22.59	0.33	10.7	36.1	112.9	145.1
AA0125	4179.57	1	Trobriand Islands rain forests	AA	61	54	152.66	153.02	-8.39	-8.32	0.885246	151.03	-9.95	0	0	39	136	175	0	0	1	1	0	0	2	9	2	11	0	0	0.0512821	0.0661765	0.0628571	1	2298	2297	273.185	345.306	162	23	25.3	26.1	27.5	25.76	0.64	4.5	160.2	272.9	245.1
AA0126	13155.6	1	Vanuatu rain forests	AA	77	115	170.2	170.23	-10.33	-10.31	1.49351	166.7	-15.14	0	0	13	79	92	0	0	4	10	0	0	30	6	14	36	0	0	2.30769	0.0759494	0.391304	1	3405	3404	267.851	253.902	243	19.8	23.5	26.6	27.6	24.11	1.13	7.8	101.9	352.3	273.9
AA0127	21850.7	1	Vogelkop montane rain forests	AA	260	155	134.52	134.66	-1.73	-0.34	0.596154	133.12	-1.04	0	0	42	354	396	0	0	0	4	0	0	20	7	4	27	0	0	0.47619	0.019774	0.0681818	1	2939	2938	1048.41	553.242	959	16.7	17.9	26	27.2	22.57	0.4	10.5	145.5	272.9	218.7
AA0128	77059.7	1	Vogelkop-Aru lowland rain forests	AA	578	416	134.87	136.13	0.27	0.31	0.719723	134.16	-2.46	0	0	47	366	413	0	0	0	1	0	0	21	8	1	29	0	0	0.446809	0.0218579	0.0702179	1	1596	1595	204.462	216.606	146	22.3	23.9	26.9	28.2	26.16	0.5	5.9	98.6	200.5	231.1
AA0201	39280.9	2	Lesser Sundas deciduous forests	AA	355	115	124.35	125.13	-7.81	-7.78	0.323944	120.48	-8.45	0	0	50	273	323	0	0	3	9	0	0	29	5	12	34	0	0	0.58	0.018315	0.105263	1	3690	3689	447.819	373.75	347	18.8	20.8	25.4	28.1	24.75	0.72	9.3	8.2	189.1	73.1
AA0202	4408.35	2	New Caledonia dry forests	AA	247	204	166.03	166.58	-20.16	-20.06	0.825911	165.22	-21.4	0	0	8	79	87	0	0	0	0	0	0	23	5	0	28	0	0	2.875	0.0632911	0.321839	1	979	978	153.536	121.108	138	18.5	24.9	20.7	26.4	22.82	2.28	7.9	50	154.1	85
AA0203	10720.7	2	Sumba deciduous forests	AA	207	115	120.17	120.82	-10.32	-9.28	0.555556	119.87	-9.8	0	0	17	180	197	0	0	0	3	0	0	12	0	3	12	0	0	0.705882	0	0.0609137	1	1159	1158	315.261	209.569	305	21.3	24.5	23.9	27.1	24.46	0.96	5.8	6.2	233.7	32
AA0204	33382	2	Timor and Wetar deciduous forests	AA	423	227	127.31	127.34	-7.69	-7.56	0.536643	124.43	-9.28	0	0	38	229	267	0	0	1	6	0	0	35	5	7	40	0	0	0.921053	0.0218341	0.149813	1	2926	2925	446.84	362.727	346	19.1	21.1	25.8	28.4	24.78	0.73	9.3	2.3	163.5	65
AA0401	805.92	4	Chatham Island temperate forests	AA	55	47	-176.15	-176.11	-44.12	-43.7	0.854545	-176.48	-44.02	0	1	0	0	1	0	0	0	0	0	0	0	0	0	0	0	0	0	0	0	1	271	270	38.9819	60.1211	4	0	0	0	0	0	0	0	0	0	0
AA0402	221786	4	Eastern Australian temperate forests	AA	389	1302	153.39	153.64	-25.8	-23.91	3.34704	151.61	-29.77	67	162	89	380	698	17	18	4	0	30	39	6	7	39	82	0.447761	0.240741	0.0674157	0.0184211	0.117479	1	1547	1546	414.689	297.62	327	5.5	18.7	17.9	26.2	17.21	4.56	20.7	25.4	84.6	79.2
AA0403	11053.5	4	Fiordland temperate forests	AA	131	208	166.89	168.13	-45.31	-44.36	1.58779	167.29	-45.29	0	2	1	44	47	0	1	0	0	0	1	4	0	1	5	0	0.5	4	0	0.106383	1	2132	2131	672.9	363.129	678	0.8	11.2	4.2	14.4	7.53	3.74	13.6	80.2	116.9	318.5
AA0404	14596.8	4	Nelson Coast temperate forests	AA	159	252	171.15	173.06	-42.76	-40.49	1.58491	172.11	-41.63	0	7	2	50	59	0	0	0	0	0	2	3	0	0	5	0	0.285714	1.5	0	0.0847458	1	1600	1599	534.01	358.735	474	1.3	12.3	6.8	16.5	9.7	3.83	15.2	96.2	189.9	223.8
AA0405	84500.4	4	North Island temperate forests	AA	419	470	177.2	178.57	-37.51	-37.39	1.12172	176.16	-39.51	1	16	2	58	77	0	0	0	0	1	5	6	0	0	12	1	0.3125	3	0	0.155844	1	2546	2545	378.669	281.346	314	0.9	10.8	10	19.5	11.72	3.64	18.6	44.7	85.8	154.2
AA0406	29938.6	4	Northland temperate kauri forests	AA	296	476	176.27	176.3	-34.17	-34.15	1.60811	174.32	-36.54	2	18	2	61	83	1	2	0	0	2	9	9	0	3	20	1	0.5	4.5	0	0.240964	1	777	776	114.225	114.889	78	7.6	17.4	12.8	20.1	14.22	3.22	12.5	57.5	116.3	140.5
AA0407	1695.03	4	Rakiura Island temperate forests	AA	56	66	168.5	168.58	-46.8	-46.68	1.17857	167.89	-46.98	0	4	2	45	51	0	1	0	0	0	2	2	0	1	4	0	0.5	1	0	0.0784314	1	859	858	156.146	138.775	114	4.6	12.6	5.4	13.3	9.14	2.95	8.7	77.1	118.9	84.7
AA0408	13216.1	4	Richmond temperate forests	AA	182	174	174.24	174.4	-40.79	-40.71	0.956044	173.27	-41.58	1	14	1	57	73	1	2	0	0	1	7	6	0	3	14	1	0.5	6	0	0.191781	1	1859	1858	494.984	372.61	429	-0.1	12	7.6	17.8	10.46	4.01	17.9	33.8	81	113.1
AA0409	272353	4	Southeast Australia temperate forests	AA	813	787	146.59	150.33	-36.13	-31.9	0.96802	147.51	-35.52	42	88	74	346	550	1	2	2	2	8	7	4	8	7	27	0.190476	0.0795455	0.0540541	0.0231214	0.0490909	1	1618	1617	394.869	262.161	309	1.4	15.7	10.8	26.1	13.86	4.91	24.7	21.2	40.8	112.5
AA0410	11714.1	4	South Island temperate forests	AA	225	128	166.92	169.85	-46.68	-45.53	0.568889	168.39	-46.1	0	4	1	47	52	0	0	0	0	0	1	2	0	0	3	0	0.25	2	0	0.0576923	1	1690	1689	230.447	231.556	171	0.9	11.3	6	14.5	9.32	3.44	13.6	50.9	81.6	102.1
AA0411	18730.1	4	Tasmanian Central Highland forests	AA	199	194	145.36	147.77	-43.06	-41.32	0.974874	146.57	-42.19	11	14	32	156	213	0	1	0	0	2	4	4	3	1	13	0.181818	0.285714	0.125	0.0192308	0.0610329	1	1451	1450	573.899	344.051	581	1.2	11.1	7.9	17.2	9.17	3.52	16	32.8	50.8	109.7
AA0412	18236.9	4	Tasmanian temperate forests	AA	132	278	148.44	148.48	-39.5	-39.45	2.10606	147.57	-41.99	12	15	33	194	254	0	0	0	0	2	3	4	3	0	12	0.166667	0.2	0.121212	0.0154639	0.0472441	1	1522	1521	239.381	239.088	152	3.7	13.6	9.9	18.1	11.96	3.14	14.4	32.4	56.7	59.3
AA0413	31316.9	4	Tasmanian temperate rain forests	AA	222	333	148.09	148.13	-40.48	-40.39	1.5	145.95	-42.14	11	15	32	168	226	0	2	0	0	2	5	4	3	2	14	0.181818	0.333333	0.125	0.0178571	0.0619469	1	1393	1392	275.625	210.667	236	3.2	12.6	8.9	17.6	10.5	3.01	14.4	32.8	84	124.5
AA0414	5286.54	4	Westland temperate forests	AA	95	77	171	171.37	-42.93	-42.56	0.810526	168.39	-44.2	0	1	1	49	51	0	0	0	0	0	0	2	0	0	2	0	0	2	0	0.0392157	1	2062	2061	368.235	394.273	203	0.7	13.1	6.7	15.9	9.97	3.84	15.2	187.3	292.2	287.1
AA0701	157509	7	Arnhem Land tropical savanna	AA	825	388	136.92	136.98	-11.02	-10.97	0.470303	133.17	-12.78	27	126	66	283	502	1	7	2	1	3	22	1	12	11	38	0.111111	0.174603	0.0151515	0.0424028	0.0756972	1	450	449	121.638	108.072	85	21.2	28.5	25	31	27.01	2.19	9.8	0	244.7	24.5
AA0702	341561	7	Brigalow tropical savanna	AA	629	1100	150.98	152.21	-19.18	-19.08	1.74881	149.06	-24.04	41	166	90	386	683	1	5	0	1	1	22	5	4	7	32	0.0243902	0.13253	0.0555556	0.0103627	0.0468521	1	1223	1222	320.052	133.994	302	9.4	22.6	19.1	28.6	20.92	4.94	19.2	4.4	77.4	38.7
AA0703	115896	7	Cape York Peninsula tropical savanna	AA	419	585	142.65	145.36	-10.18	-10.06	1.39618	143.41	-13.01	33	130	78	328	569	4	9	3	1	8	26	13	8	17	55	0.242424	0.2	0.166667	0.0243902	0.0966608	1	812	811	81.8654	70.9525	70	21.3	27.1	25	29.7	26.21	1.94	8.4	0.1	256.2	19.6
AA0704	358464	7	Carpentaria tropical savanna	AA	1210	874	139.39	144.17	-14.52	-13.84	0.722314	138.51	-17.78	32	151	71	307	561	0	1	1	2	1	8	3	5	4	17	0.03125	0.0529801	0.0422535	0.0162866	0.030303	1	1040	1039	142.253	117.135	128	15	26.4	22.7	31.4	26.3	3.76	16.4	0.1	81.9	13.9
AA0705	128067	7	Einasleigh upland savanna	AA	576	598	142.19	147.69	-20.94	-15.57	1.03819	144.94	-18.26	22	138	69	268	497	0	4	0	0	0	16	2	3	4	21	0	0.115942	0.0289855	0.011194	0.0422535	60	1210	1150	494.148	191.542	501	14.8	23.7	22	30.4	23.41	3.47	15.6	0.9	125.4	26.2
AA0706	346656	7	Kimberly tropical savanna	AA	1436	783	129.68	132.96	-14.4	-13.31	0.545265	126.19	-16.8	42	191	80	310	623	5	20	4	2	15	44	4	12	31	75	0.357143	0.230366	0.05	0.0387097	0.120385	1	988	987	229.182	156.577	208	19.2	28.8	23.6	32.1	26.97	3.43	12.9	0	97.1	6.1
AA0707	459496	7	Mitchell grass downs	AA	1411	952	133.35	147.03	-25.83	-17.26	0.674699	140.19	-21.54	24	138	52	231	445	0	0	0	0	1	9	0	2	0	12	0.0416667	0.0652174	0	0.00865801	0.0269663	16	683	667	258.987	74.3372	248	11.3	26.9	19.8	31.7	24.27	5.27	20.4	0.1	43.2	21.2
AA0708	26618.2	7	Trans Fly savanna and grasslands	AA	365	162	139.94	143.26	-9.34	-7.88	0.443836	141.6	-8.61	0	0	44	306	350	0	0	1	0	0	0	5	5	1	10	0	#N/A	0.113636	0.0163399	0.0285714	1	87	86	23.5587	21.2556	19	24.5	27	25.7	28.1	26.52	0.86	3.6	14.5	249.9	88.9
AA0709	224881	7	Victoria Plains tropical savanna	AA	1148	533	124.78	135.65	-19.55	-14.75	0.464286	130.22	-17.15	22	127	53	214	416	0	0	0	0	0	5	1	3	0	9	0	0.0393701	0.0188679	0.0140187	0.0216346	1	710	709	257.196	78.102	249	18.4	30.5	22.1	32.4	26.63	4.19	14	0	74.7	5.6
AA0801	53593.9	8	Cantebury-Otago tussock grasslands	AA	314	347	173.08	173.81	-43.09	-42.1	1.1051	171.01	-44.28	0	10	1	47	58	0	0	0	0	0	5	0	0	0	5	0	0.5	0	0	0.0862069	1	2269	2268	473.959	362.359	405	-0.9	10.6	7.4	17.3	9.3	4.1	18.2	19.6	36.5	96.3
AA0802	253515	8	Eastern Australia mulga shrublands	AA	649	809	142.16	148.82	-31.84	-24.59	1.24653	145.49	-28.22	21	94	41	215	371	0	0	0	0	0	0	0	0	0	0	0	0	0	0	0	63	534	471	216.922	80.0324	210	10	26.9	13.8	30.9	21.02	6.31	20.9	6.9	31.8	27.8
AA0803	321999	8	Southeast Australia temperate savanna	AA	855	1012	141.95	150.91	-36.95	-27.86	1.18363	146.43	-32.4	30	131	56	296	513	0	0	1	0	0	5	1	2	1	8	0	0.0381679	0.0178571	0.00675676	0.0155945	42	1230	1188	201.18	119.001	162	6.5	21.4	12.4	28.5	18.03	5.95	22	13.3	26.1	64.1
AA1001	11999.4	10	Australian Alps montane grasslands	AA	241	242	146.69	149	-36.82	-35.47	1.00415	148.17	-36.55	19	49	43	227	338	0	0	0	0	5	5	1	3	0	14	0.263158	0.102041	0.0232558	0.0132159	0.0414201	150	2431	2281	1102.58	268.399	1141	0.9	15.1	4.9	19.2	9.68	5	18.3	43.4	98.7	69.5
AA1002	15502.7	10	Central Range sub-alpine grasslands	AA	263	73	147.41	147.6	-3.57	-3.42	0.277567	137.78	-4.06	0	0	9	84	93	0	0	2	2	0	0	28	4	4	32	0	0	3.11111	0.047619	0.344086	503	5179	4676	3155.11	475.674	3164	9.8	11.8	20.2	21.5	14.97	0.59	11.7	85.3	273.1	467.5
AA1003	40006.4	10	South Island montane grasslands	AA	500	433	171.4	173.83	-43.19	-41.76	0.866	170.72	-43.71	0	9	1	40	50	0	1	0	0	0	5	1	0	1	6	0	0.555556	1	0	0.12	1	3173	3172	1067.99	454.444	1073	-2.1	10.1	5.5	16	7.14	4.29	18.1	48.6	83	266.2
AA1101	877.69	11	Antipodes Subantarctic Islands tundra	AA	29	37	179.17	179.2	-47.68	-47.66	1.27586	166.09	-50.69	0	0	0	36	36	0	0	0	4	0	0	8	0	4	8	0	0	0	0	0.222222	1	637	636	89.1462	132.891	21	3.2	7.7	4.6	10.1	6.44	1.92	6.9	107.8	142.6	108.7
AA1201	137255	12	Coolgardie woodlands	AA	1131	393	117.61	129.44	-33.21	-29.61	0.34748	123.52	-31.41	9	109	34	190	342	0	0	0	0	0	2	0	0	0	2	0	0.0183486	0	0	0.00584795	1	680	679	360.828	151.863	403	9.5	21.3	12.1	27.8	17.83	5.13	18.3	8.7	21.9	27
AA1202	115460	12	Esperance mallee	AA	830	355	123.63	126.67	-33.89	-31.6	0.427711	122.22	-33.18	20	98	38	223	379	0	3	0	1	5	9	2	1	4	17	0.25	0.0918367	0.0526316	0.0044843	0.0448549	1	769	768	258.618	120.256	301	9.8	20.1	12.4	24.8	16.58	4.22	15	11.1	36	27
AA1203	60898.5	12	Eyre and York mallee	AA	498	357	136.82	138.79	-35.01	-31.73	0.716867	135.44	-33.52	7	84	37	265	393	0	2	0	0	1	6	1	2	2	10	0.142857	0.0714286	0.027027	0.00754717	0.0254453	1	490	489	102.737	77.1813	81	9.5	20.5	12.3	24.4	16.82	4.23	14.9	6.6	30.1	20.3
AA1204	10443.1	12	Jarrah-Karri forest and shrublands	AA	296	179	114.97	118.21	-35.13	-33.53	0.60473	115.85	-34.33	17	45	31	195	288	0	0	0	0	7	4	1	3	0	15	0.411765	0.0888889	0.0322581	0.0153846	0.0520833	1	318	317	109.433	71.6795	108	10.6	19.6	13	21.6	15.72	3.32	11	10.7	119.3	27.3
AA1205	15214.1	12	Swan Coastal Plain Scrub and Woodlands	AA	103	409	114.96	116.03	-33.73	-30.05	3.97087	115.89	-31.89	16	80	37	227	360	1	1	0	0	5	18	0	4	2	27	0.3125	0.225	0	0.0176211	0.075	1	340	339	109.847	74.5733	105	11.6	21.7	14.1	26.3	18.25	4.29	14.7	3.6	93.8	15.7
AA1206	23779.3	12	Mount Lofty woodlands	AA	144	368	137.96	139.27	-35.66	-32.35	2.55556	138.62	-34.01	11	74	44	268	397	0	0	1	0	1	4	1	1	1	7	0.0909091	0.0540541	0.0227273	0.00373134	0.0176322	1	944	943	274.557	166.152	292	6.7	19.1	11.7	23.7	15.23	4.35	17	11.7	32.8	23.7
AA1207	197880	12	Murray-Darling woodlands and mallee	AA	625	722	145.44	146.24	-33.38	-30.8	1.1552	142.53	-34.06	28	126	59	295	508	0	0	0	1	2	5	3	1	1	11	0.0714286	0.0396825	0.0508475	0.00338983	0.0216535	1	361	360	97.8238	42.7763	86	7.9	19.8	11	27.7	16.77	5.26	19.8	11.8	20.6	29.9
AA1208	27518.4	12	Naracoorte woodlands	AA	273	352	138.7	141.77	-38.43	-35.27	1.28938	140.24	-36.85	11	46	48	274	379	0	0	0	0	0	2	1	1	0	4	0	0.0434783	0.0208333	0.00364964	0.0105541	1	206	205	61.2728	34.6804	64	8.8	18.3	10.9	21.5	14.63	3.72	12.7	15	42.4	28.3
AA1209	168704	12	Southwest Australia savanna	AA	625	913	113.15	119.58	-26.16	-25.48	1.4608	116.25	-29.87	21	136	49	252	458	1	4	0	0	5	31	0	0	5	36	0.238095	0.227941	0	0	0.0786026	1	694	693	304.415	106.629	304	10	20.9	15.9	29.6	19	5.52	19.6	0	35.5	20.4
AA1210	46026.1	12	Southwest Australia woodlands	AA	310	464	118.43	118.48	-34.94	-30.82	1.49677	116.78	-32.9	20	71	37	208	336	0	1	0	0	8	8	1	4	1	21	0.4	0.112676	0.027027	0.0192308	0.0625	1	606	605	228.183	89.2105	262	9.7	19.7	12.7	25.2	15.98	4.28	15.5	9.3	68.2	26.3
AA1301	90287.7	13	Carnarvon xeric shrublands	AA	228	708	113.87	115.64	-24.87	-21.58	3.10526	114.35	-24.76	11	142	43	217	413	0	6	0	0	0	32	0	0	6	32	0	0.225352	0	0	0.0774818	1	360	359	121.824	83.2755	113	13.7	28.3	18.8	31.2	23.08	5.05	17.5	0	35.9	7.8
AA1302	281051	13	Central Ranges xeric scrub	AA	977	714	126.56	136.22	-27.35	-20.93	0.730809	131.39	-24.14	14	132	55	186	387	0	1	0	1	1	6	1	3	2	11	0.0714286	0.0454545	0.0181818	0.016129	0.0284238	171	1499	1328	598.871	153.089	598	9	26.7	15.8	30.8	21.04	6.28	21.8	4.6	23	20.2
AA1303	155524	13	Gibson desert	AA	491	583	124.01	128.85	-27.31	-22.07	1.18737	126.43	-24.69	9	103	39	120	271	0	0	0	0	0	0	0	0	0	0	0	0	0	0	0	302	641	339	460.443	52.4039	473	12	28.4	16.5	31.7	23.27	6.04	19.7	1.3	27.1	9.9
AA1304	820767	13	Great Sandy-Tanami desert	AA	1906	886	119.43	137.77	-25.95	-17.97	0.464848	128.6	-21.96	16	144	54	185	399	0	2	0	0	1	5	1	3	2	10	0.0625	0.0347222	0.0185185	0.0162162	0.0250627	27	1066	1039	399.748	129.642	385	10.4	28	20.2	32.1	24.66	5.44	21.7	0	26.4	18.4
AA1305	423734	13	Great Victoria desert	AA	1224	789	122.47	135.23	-32.64	-25.61	0.644608	128.85	-29.13	9	135	48	160	352	0	1	0	0	0	3	0	1	1	4	0	0.0222222	0	0.00625	0.0113636	69	892	823	378.134	140.635	380	9.6	22.2	13.1	30.3	19.72	5.74	20.7	3.3	14.7	25.6
AA1306	195003	13	Nullarbor Plains xeric shrublands	AA	875	409	123.73	133.01	-32.46	-28.84	0.467429	128.37	-30.65	4	100	28	167	299	0	1	0	0	0	1	0	2	1	3	0	0.01	0	0.011976	0.0100334	1	309	308	168.94	64.7447	167	11	22.4	12.1	27.4	18.38	4.77	16.4	4.6	15.4	19.9
AA1307	179311	13	Pilbara shrublands	AA	646	402	117.93	121.49	-20.37	-19.95	0.622291	118.35	-21.76	10	120	55	208	393	1	6	2	0	1	18	0	3	9	22	0.1	0.15	0	0.0144231	0.0559796	1	1241	1240	346.743	207.073	313	14.1	30.3	20.1	32.5	25.29	5.31	18.4	0	44.4	9
AA1308	583394	13	Simpson desert	AA	1012	1086	133.96	144.08	-31.31	-21.54	1.07312	139.02	-26.42	17	119	54	209	399	0	1	0	1	0	5	2	1	2	8	0	0.0420168	0.037037	0.00478469	0.0200501	1	628	627	125.911	80.8379	100	10.5	27.1	15.7	31.7	22.44	6.42	21.2	2.8	22.6	15.9
AA1309	376487	13	Tirari-Sturt stony desert	AA	991	916	133.23	143.43	-34.02	-25.75	0.924319	138.33	-29.88	15	145	54	250	464	0	2	0	0	1	9	0	2	2	12	0.0666667	0.062069	0	0.008	0.0258621	1	1154	1153	200.787	114.841	174	7.2	21.3	12.5	30.2	19.02	5.92	23	5.9	12.4	27.6
AA1310	459616	13	Western Australian Mulga shrublands	AA	879	883	114.95	123.63	-30.68	-22.7	1.00455	119.29	-26.69	12	138	48	170	368	0	3	0	0	0	9	0	0	3	9	0	0.0652174	0	0	0.0244565	111	1083	972	484.4	104.96	504	10.5	25.5	17.5	32.5	21.92	6.23	22	0	17.9	18
AA1401	26708.3	14	New Guinea mangroves	AA	251	110	150.04	150.15	-1	-0.92	0.438247	137.1	-4.92	0	0	3	306	309	0	0	0	0	0	0	10	1	0	11	0	0	3.33333	0.00326797	0.0355987	1	630	629	9.2028	31.6439	1	24.2	26.5	26.8	28.3	26.6	0.64	4.1	55.3	226.5	265.9
AN1101	1.15586e+06	11	Marielandia Antarctic tundra	AN	2621	2528	-56.21	-55	-63.17	-62.98	0.964517	-81.36	-74.11	0	0	0	0	0	0	0	0	0	0	0	0	0	0	0	0	0	0	0	#N/A	1	4743	4742	777.115	538.653	672	0	0	0	0	0	0	0	0	0	0
AN1102	2.13186e+06	11	Maudlandia Antarctic desert	AN	3235	4525	169.39	180	-65.49	-64.92	1.39876	-15.59	-75.64	0	0	0	0	0	0	0	0	0	0	0	0	0	0	0	#N/A	#N/A	#N/A	#N/A	#N/A	1	4363	4362	1220.57	695.056	1189	0	0	0	0	0	0	0	0	0	0
AN1103	8513.03	11	Scotia Sea Islands tundra	AN	146	102	3.34	3.48	-54.01	-53.97	0.69863	-36.49	-54.43	0	0	0	2	2	0	0	0	1	0	0	2	0	1	2	#N/A	#N/A	#N/A	0	1	1	2823	2822	369.386	338.4	284	-13.1	0.5	-2.5	4.8	-0.61	2.72	17.9	86	160.3	94.4
AN1104	8179.2	11	Southern Indian Ocean Islands tundra	AN	133	119	73.23	73.77	-45.96	-45.95	0.894737	70.22	-49.19	0	0	0	0	0	0	0	0	0	0	0	0	0	0	0	#N/A	#N/A	#N/A	#N/A	#N/A	1	2687	2686	282.497	309.505	236	0	0	0	0	0	0	0	0	0	0
AT0101	103404	1	Albertine Rift montane forests	AT	382	793	30.3	31.4	1.59	2.66	2.07592	29.68	-1.93	67	130	223	756	1176	17	3	14	13	38	16	53	34	47	141	0.567164	0.123077	0.237668	0.0449735	0.119898	272	3468	3196	1667.28	466.039	1621	11.5	12.9	24	25.5	18.92	0.39	14	1.3	104	118
AT0102	188821	1	Atlantic Equatorial coastal forests	AT	509	1110	8.99	13.58	-5.74	4.24	2.18075	11.29	-0.75	93	120	173	504	890	3	3	0	0	13	15	8	5	6	41	0.139785	0.125	0.0462428	0.00992063	0.0460674	1	1198	1197	300.627	217.819	281	19.3	23.1	25.2	28.2	25.04	1.14	8.9	0	132.1	239.3
AT0103	37879.5	1	Cameroonian Highlands forests	AT	234	217	14.16	14.68	8.54	8.95	0.92735	10.2	5.64	89	38	143	588	858	6	4	3	3	23	10	25	13	16	71	0.258427	0.263158	0.174825	0.0221088	0.0827506	135	2975	2840	1238.19	391.197	1246	15.7	18.5	24.1	28.1	21.52	1.07	12.4	0	253.4	22.8
AT0104	412882	1	Central Congolian lowland forests	AT	1041	714	16.35	25.72	-4.38	2.04	0.685879	21.04	-1.17	18	77	125	358	578	0	0	0	0	2	3	2	4	0	11	0.111111	0.038961	0.016	0.0111732	0.0190311	226	688	462	444.788	61.9222	436	23.2	24.4	25.3	26.6	24.93	0.43	3.4	12.8	171.5	151.9
AT0105	2057.37	1	Comoros forests	AT	36	64	45.26	45.29	-11.94	-11.36	1.77778	44.25	-12.18	1	18	8	81	108	0	2	0	11	1	7	23	0	13	31	1	0.388889	2.875	0	0.287037	1	2418	2417	470.394	437.406	329	17.8	21.4	22.5	25.8	22.82	1.32	8	58.2	331.3	72.7
AT0106	20628.7	1	Cross-Niger transition forests	AT	171	198	6.64	8.18	4.63	6.42	1.15789	7.41	5.53	29	69	117	383	598	0	0	0	0	0	1	0	1	0	2	0	0.0144928	0	0.00261097	0.00334448	41	389	348	155.275	33.3721	152	24.6	27.1	25.6	29.1	26.26	0.99	4.5	9.5	302.6	32.5
AT0107	51839.6	1	Cross-Sanaga-Bioko coastal forests	AT	359	335	8.42	11.16	3.56	6.58	0.933148	8.59	5.07	108	129	166	504	907	0	1	2	0	9	17	14	9	3	49	0.0833333	0.131783	0.0843373	0.0178571	0.0540243	1	2588	2587	394.788	430.203	191	17.2	20.4	25.5	28.7	25.07	0.98	11.5	8.4	338	67.1
AT0108	65198.8	1	East African montane forests	AT	213	365	37.93	38.06	4.23	4.56	1.71362	35.3	0	17	62	189	632	900	1	5	3	0	4	11	15	19	9	49	0.235294	0.177419	0.0793651	0.0300633	0.0544444	565	3963	3398	1980.41	501.21	1980	5.5	8.3	24.1	26.6	17.19	0.9	21.1	1.2	73.1	112.8
AT0109	23556.1	1	Eastern Arc forests	AT	210	142	38.25	38.82	-2.89	-2.65	0.67619	35.83	-8.26	78	84	164	556	882	9	9	5	8	32	31	36	14	31	113	0.410256	0.369048	0.219512	0.0251799	0.128118	123	2568	2445	1358.6	469.579	1488	14.2	18.6	22.6	26.9	19.97	1.59	12.7	0	87.4	82.9
AT0110	92315.2	1	Eastern Congolian swamp forests	AT	1087	547	16.21	25.98	-2.75	2.16	0.50322	21.1	-0.3	13	75	128	367	583	0	0	1	0	1	2	3	3	1	9	0.0769231	0.0266667	0.0234375	0.00817439	0.0154374	173	615	442	394.565	50.3551	394	23.6	24.7	25.3	26.7	25.12	0.46	3.1	5.8	163.4	152.8
AT0111	188895	1	Eastern Guinean forests	AT	795	371	1.44	1.67	10.11	10.47	0.466667	-2.71	7.61	61	92	187	525	865	8	0	2	0	16	8	6	18	10	48	0.262295	0.0869565	0.0320856	0.0342857	0.0554913	21	930	909	195.509	113.244	178	22.4	26	25.6	29.7	26.41	1.09	7.3	0.5	123.3	31.5
AT0112	247734	1	Ethiopian montane forests	AT	625	1394	37.69	43.35	21.79	22.02	2.2304	38.95	13.13	28	61	137	500	726	2	4	5	1	6	21	5	11	12	43	0.214286	0.344262	0.0364964	0.022	0.0592287	246	3369	3123	1505.08	358.767	1517	13.8	17	25.2	32.1	21.16	1.04	18.3	0.3	11.7	44
AT0113	309.693	1	Granitic Seychelles forests	AT	19	26	56.25	56.29	-4.28	-4.27	1.36842	55.46	-4.67	5	31	2	55	93	2	6	0	2	4	12	11	1	10	28	0.8	0.387097	5.5	0.0181818	0.301075	1	718	717	132.531	184.974	42	0	26.1	0	26.1	2.18	7.53	26.1	65.6	380.5	65.6
AT0114	30923.5	1	Guinean montane forests	AT	160	210	-7.57	-7.24	10.49	12.17	1.3125	-12.15	11.23	20	51	134	410	615	8	0	1	0	13	4	3	9	9	29	0.65	0.0784314	0.0223881	0.0219512	0.0471545	77	1931	1854	759.216	187.938	766	19.1	23.6	24.5	30.2	23.46	1.43	11.1	0	252.6	18
AT0115	3061.33	1	Knysna-Amatole montane forests	AT	207	36	27.02	27.27	-32.73	-32.54	0.173913	23.37	-33.98	25	36	52	281	394	4	1	0	0	5	4	5	3	5	17	0.2	0.111111	0.0961538	0.0106762	0.0431472	1	1747	1746	431.814	306.748	301	11.3	19.3	13.2	22.5	16.5	2.88	11.2	18.6	58.8	65.6
AT0116	17778.8	1	KwaZulu-Cape coastal forest mosaic	AT	255	331	31.68	32.44	-28.94	-28.14	1.29804	30.48	-30.38	40	88	82	382	592	0	1	0	0	6	14	7	3	1	30	0.15	0.159091	0.0853659	0.0078534	0.0506757	1	995	994	212.865	179.477	158	13.7	21.2	17.9	25.5	19.69	2.57	11.8	15.8	58.1	64.8
AT0117	111760	1	Madagascar lowland forests	AT	396	1311	49.81	50.48	-13.51	-13.37	3.31061	48.59	-19.27	97	147	81	184	509	15	48	6	14	67	92	37	34	83	230	0.690722	0.62585	0.45679	0.184783	0.451866	1	2219	2218	495.542	397.834	416	12.7	19.3	22.3	26.6	21.81	2.11	13.9	19.9	198.4	114.6
AT0118	198972	1	Madagascar subhumid forests	AT	572	1280	49.66	50.06	-12.64	-12.44	2.23776	47.03	-18.6	112	151	89	164	516	7	17	1	1	69	81	21	17	26	188	0.616071	0.536424	0.235955	0.103659	0.364341	1	2622	2621	1015.46	348.316	977	11.2	17.5	23.4	26.6	19.94	2.18	15.4	0	150.9	80.8
AT0119	30146.1	1	Maputaland coastal forest mosaic	AT	184	449	32.91	33.66	-25.86	-24.34	2.44022	32.74	-26.36	47	109	106	396	658	0	2	0	0	1	23	4	0	2	28	0.0212766	0.211009	0.0377358	0	0.0425532	1	805	804	90.0981	116.419	55	16.3	24.9	19.3	27.3	22.65	2.98	11	7.2	99.6	54
AT0120	4931.84	1	Mascarene forests	AT	70	66	63.33	63.5	-19.77	-19.67	0.942857	55.55	-21.11	1	19	8	54	82	0	4	1	8	0	5	17	2	13	24	0	0.263158	2.125	0.037037	0.292683	1	3069	3068	610.359	606.006	324	12.5	18.5	20.8	26.3	20.75	2.18	13.8	38.3	217.8	90.9
AT0121	1141.11	1	Mount Cameroon and Bioko montane forests	AT	35	42	9.01	9.32	4.04	4.42	1.2	9.16	4.23	81	55	132	414	682	1	0	0	0	11	4	23	10	1	48	0.135802	0.0727273	0.174242	0.0241546	0.0703812	60	4059	3999	1437.41	829.519	1335	17.4	19.8	20.6	24.5	20.23	0.83	7.1	25.1	426.7	39.6
AT0122	14343.3	1	Niger Delta swamp forests	AT	188	148	5.62	7.32	4.5	5.84	0.787234	6.47	5.17	3	63	104	340	510	0	0	0	0	0	3	1	1	0	5	0	0.047619	0.00961538	0.00294118	0.00980392	1	494	493	149.797	108.883	113	23.6	26.2	25.4	28.5	26.15	0.99	4.9	16.5	355.2	41.4
AT0123	67043.1	1	Nigerian lowland forests	AT	464	311	2.56	6.76	5.38	8.18	0.670259	4.66	6.78	35	74	138	415	662	0	1	0	1	2	1	2	3	2	8	0.0571429	0.0135135	0.0144928	0.00722892	0.0120846	1	875	874	168.207	135.505	134	23.5	27.5	25.5	29.4	26.7	1.28	5.9	4.9	171.7	25.3
AT0124	531067	1	Northeastern Congolian lowland forests	AT	1265	1073	18.77	30.15	-3.87	5.78	0.848221	24.46	0.96	63	117	202	575	957	2	0	6	0	17	12	13	15	8	57	0.269841	0.102564	0.0643564	0.026087	0.0595611	337	2538	2201	643.331	219.542	604	19	20.5	24.8	27.3	24.26	0.59	8.3	9.8	114.1	156.5
AT0125	112151	1	Northern Zanzibar-Inhambane coastal forest mosaic	AT	610	1271	39.84	43.23	-4.94	1.78	2.08361	39.59	-3.94	55	191	174	565	985	2	12	5	8	8	65	17	11	27	101	0.145455	0.340314	0.0977011	0.019469	0.102538	1	2116	2115	119.301	163.914	69	17.4	21.8	26.6	30.3	26.5	1.36	12.9	0.5	46	71.6
AT0126	432190	1	Northwestern Congolian lowland forests	AT	866	1146	11.04	18.86	-4.14	6.16	1.32333	14.95	1.01	75	123	188	538	924	1	0	1	1	6	14	3	14	3	37	0.08	0.113821	0.0159574	0.0260223	0.0400433	104	1334	1230	510.548	128.915	498	20.1	23.2	25.1	27.3	24.37	0.77	7.2	0.1	117.8	189.8
AT0127	1032.31	1	Sao Tome, Principe and Annobon moist lowland forests	AT	32	42	7.32	7.47	1.52	1.71	1.3125	6.54	0.13	11	22	7	108	148	3	4	0	10	10	17	29	1	17	57	0.909091	0.772727	4.14286	0.00925926	0.385135	47	1810	1763	347.989	277.493	225	20.4	23.6	23.8	26	23.82	1.11	5.6	5.8	228.1	36.4
AT0128	146463	1	Southern Zanzibar-Inhambane coastal forest mosaic	AT	454	910	40.84	40.84	-7.43	-7.4	2.00441	40.02	-13.6	47	132	116	450	745	0	5	2	0	1	30	8	2	7	41	0.0212766	0.227273	0.0689655	0.00444444	0.0550336	1	2402	2401	153.387	190.839	99	15.5	21.8	24.2	28.1	24.5	2.09	12.6	0	117.3	40.3
AT0129	128060	1	Western Congolian swamp forests	AT	1028	778	15.34	24.59	-3.06	3.93	0.756809	17.02	0.43	19	77	136	330	562	0	0	0	0	1	3	2	0	0	6	0.0526316	0.038961	0.0147059	0	0.0106762	157	506	349	365.679	44.3429	370	23.5	25.1	25.3	26.9	25.09	0.58	3.4	22.9	198.6	156.5
AT0130	204226	1	Western Guinean lowland forests	AT	847	631	-7.49	-6.07	9.89	10.02	0.744982	-9.93	7.18	57	87	179	458	781	6	1	5	3	17	12	11	21	15	61	0.298246	0.137931	0.0614525	0.0458515	0.078105	1	1266	1265	249.646	156.933	224	20.7	24.4	25.5	29	25.27	0.86	8.3	0.4	131.6	59.8
AT0201	4548.13	2	Cape Verde Islands dry forests	AT	42	58	-22.95	-22.65	16.91	17.19	1.38095	-23.59	15.06	2	15	5	67	89	0	6	0	6	1	10	10	0	12	21	0.5	0.666667	2	0	0.235955	1	2843	2842	389.179	464.591	267	15.9	21.1	21.5	26.9	22.32	1.83	11	0	35.1	16.3
AT0202	151564	2	Madagascar dry deciduous forests	AT	514	890	49.85	49.94	-12.12	-11.94	1.73152	46.97	-16.77	36	104	65	165	370	0	22	1	3	21	50	16	10	26	97	0.583333	0.480769	0.246154	0.0606061	0.262162	1	1392	1391	230.48	177.161	154	17.7	23.1	25.3	27.9	24.84	1.64	10.2	0	182.4	66.5
AT0203	38084.8	2	Zambezian Cryptosepalum dry forests	AT	219	223	25.16	25.43	-13.14	-12.36	1.01826	23.61	-14.43	14	34	95	384	527	0	0	0	0	0	2	0	1	0	3	0	0.0588235	0	0.00260417	0.0056926	980	1508	528	1107.77	58.206	1095	15.9	23.3	18.5	26	21.9	2.58	10.1	0	169.4	0.6
AT0701	657515	7	Angolan Miombo woodlands	AT	1080	1214	12.98	22.95	-16.96	-6.05	1.12407	17.96	-11.51	52	88	176	548	864	1	3	1	0	3	18	5	5	5	31	0.0576923	0.204545	0.0284091	0.00912409	0.0358796	1	2353	2352	1232.41	239.204	1225	14.2	18.8	23.7	26.7	20.89	1.71	12.5	0	93.9	12.6
AT0702	133028	7	Angolan Mopane woodlands	AT	496	667	13.02	17.69	-20.94	-14.94	1.34476	15.36	-17.94	20	101	131	388	640	1	1	0	0	2	17	2	3	2	24	0.1	0.168317	0.0152672	0.00773196	0.0375	436	2045	1609	1164.78	130.989	1126	14.3	19.7	17.5	26.5	21.24	3.02	12.2	0	77.9	1.8
AT0703	92.9822	7	Ascension scrub and grasslands	AT	14	11	-14.42	-14.29	-7.98	-7.88	0.785714	-14.35	-7.93	0	0	0	0	0	0	0	0	0	0	0	0	0	0	0	#N/A	#N/A	#N/A	#N/A	#N/A	1	825	824	156.324	180.677	88	0	0	0	0	0	0	0	0	0	0
AT0704	1.17932e+06	7	Central Zambezian Miombo woodlands	AT	1592	1682	32.72	36	-1.48	-1.44	1.05653	28.8	-9.3	84	188	241	712	1225	3	8	1	1	15	23	9	4	13	51	0.178571	0.12234	0.0373444	0.00561798	0.0416327	462	2510	2048	1166.12	242.099	1184	14.2	18.1	25.2	27.9	21.76	1.57	13.7	0	100.5	48.5
AT0705	913702	7	East Sudanian savanna	AT	1829	1617	30.15	37.2	6.19	15.27	0.88409	25.01	8	31	122	180	625	958	0	0	1	1	1	12	5	5	2	23	0.0322581	0.0983607	0.0277778	0.008	0.0240084	154	2505	2351	595.821	238.644	547	17.7	19.9	27.8	33.3	26.21	1.58	15.6	0	88.7	40.8
AT0706	482013	7	Eastern Miombo woodlands	AT	715	1393	33.58	40.16	-17.94	-5.41	1.94825	36.87	-11.68	41	101	149	463	754	0	0	0	0	1	11	3	0	0	15	0.0243902	0.108911	0.0201342	0	0.0198939	14	2547	2533	565.819	311.041	519	14.1	20	23.8	28.9	23.63	2.01	14.8	0	107.2	38
AT0707	670790	7	Guinean forest-savanna mosaic	AT	3217	1025	-13.01	12.8	14.07	14.74	0.31862	6.57	9.27	33	125	202	557	917	0	5	1	0	1	29	4	7	6	41	0.030303	0.232	0.019802	0.0125673	0.044711	1	1798	1797	272.054	197.175	228	19.4	23.4	27.9	32.6	26.48	1.32	13.2	0	69.9	21.9
AT0708	7809.19	7	Itigi-Sumbu thicket	AT	126	87	34.17	34.82	-5.94	-5.16	0.690476	30.16	-8.42	12	41	111	365	529	0	0	0	0	0	2	0	0	0	2	0	0.0487805	0	0	0.00378072	762	1493	731	1144.82	198.02	1140	18.2	22.2	21.6	26	22.2	1.23	7.8	0	143.9	1.1
AT0709	334545	7	Kalahari Acacia-Baikiaea woodlands	AT	1079	800	25.79	28.31	-25.33	-18.08	0.741427	22.69	-21.91	30	91	132	475	728	0	1	0	0	0	4	1	0	1	5	0	0.043956	0.00757576	0	0.00686813	805	1816	1011	1083.03	123.512	1061	11.9	23.8	16.5	26.9	21.53	4.22	15	0	71.2	3.3
AT0710	7478.52	7	Mandara Plateau mosaic	AT	95	139	13.28	14.15	9.88	11.13	1.46316	13.72	10.5	10	18	86	330	444	0	0	0	0	0	2	0	0	0	2	0	0.111111	0	0	0.0045045	393	1454	1061	721.746	169.35	710	21.5	29.6	23.9	32.3	26.23	2.53	10.8	0	221.5	1.2
AT0711	324482	7	Northern Acacia-Commiphora bushlands and thickets	AT	767	1160	39.21	40.07	4.04	5.91	1.51239	36.61	0.69	15	99	212	697	1023	1	0	1	3	2	16	6	10	5	34	0.133333	0.161616	0.0283019	0.0143472	0.0332356	1	3169	3168	877.93	497.765	783	11.4	14.4	28.1	30.3	24.31	0.98	18.9	0.4	60.3	84.2
AT0712	705006	7	Northern Congolian forest-savanna mosaic	AT	2392	930	10.07	31.67	0.67	9.02	0.388796	20.87	4.84	63	146	216	624	1049	1	0	1	2	9	15	2	3	4	29	0.142857	0.10274	0.00925926	0.00480769	0.0276454	186	1975	1789	674.655	204.951	615	15.3	19.9	26.5	32	24.81	1.05	16.7	0	118.9	65.3
AT0713	3.04245e+06	7	Sahelian Acacia savanna	AT	5984	1439	38.34	39.21	19.22	20.91	0.240475	11.31	14.68	16	113	155	562	846	0	3	5	2	1	13	3	15	10	32	0.0625	0.115044	0.0193548	0.0266904	0.0378251	1	2477	2476	433.059	220.836	405	14.9	22.6	27.4	36.4	28.26	3.41	21.5	0	3.1	17.8
AT0714	17947.6	7	Serengeti volcanic grasslands	AT	153	135	35.59	36.96	-3.52	-2.3	0.882353	34.92	-3.23	11	64	137	437	649	0	0	0	0	0	3	3	0	0	6	0	0.046875	0.0218978	0	0.00924499	703	2725	2022	1452.49	272.049	1554	16.5	19.5	21.6	25.7	20.53	1.21	9.2	0.5	93.7	18.5
AT0715	1.0493e+06	7	Somali Acacia-Commiphora bushlands and thickets	AT	1632	2205	41.95	50.4	-0.97	17.89	1.3511	42.98	7.95	19	177	165	558	919	0	14	6	8	2	70	15	18	28	105	0.105263	0.39548	0.0909091	0.0322581	0.114255	1	2496	2495	597.178	401.633	534	16.6	19.4	28.8	31.6	25.98	0.82	15	0	5.5	40.4
AT0716	226770	7	Southern Acacia-Commiphora bushlands and thickets	AT	543	636	34.49	38.74	-0.23	0.1	1.17127	36.28	-5.94	17	90	180	609	896	0	1	0	0	2	9	5	4	1	20	0.117647	0.1	0.0277778	0.00656814	0.0223214	267	2338	2071	1195.78	265.01	1196	14.6	17.3	24.6	28.1	21.68	1.23	13.5	0	78.5	144.3
AT0717	222541	7	Southern Africa bushveld	AT	617	781	25.88	31.9	-25.69	-18.67	1.2658	28.63	-22.38	37	135	149	475	796	0	4	0	0	0	22	1	1	4	24	0	0.162963	0.00671141	0.00210526	0.0301508	191	2080	1889	1024.62	243.223	1024	10.1	19.9	18.1	27.8	20.1	3.94	17.7	0	60.5	8.2
AT0718	567187	7	Southern Congolian forest-savanna mosaic	AT	1395	908	16.22	28.8	-10.18	-2	0.650896	22.51	-6.09	42	126	185	563	916	1	1	3	0	4	10	0	7	5	21	0.0952381	0.0793651	0	0.0124334	0.0229258	154	2179	2025	656.022	193.643	618	19	21	25.5	26.6	24.42	0.42	7.6	0	159.1	45
AT0719	406913	7	Southern Miombo woodlands	AT	1026	767	33.45	34.95	-17.92	-11.11	0.747563	30.12	-17.87	45	126	177	514	862	0	2	0	0	0	12	6	1	2	19	0	0.0952381	0.0338983	0.00194553	0.0220418	1	2583	2582	898.286	386.104	984	11.8	19	21.1	28.9	21.53	2.84	17.1	0	92.8	32.3
AT0720	130.032	7	St. Helena scrub and woodlands	AT	16	13	-5.79	-5.65	-16.02	-15.9	0.8125	-5.72	-15.96	0	0	0	4	4	0	0	0	1	0	0	1	0	1	1	#N/A	#N/A	#N/A	0	0.25	1	748	747	299.777	141.097	306	0	0	0	0	0	0	0	0	0	0
AT0721	165042	7	Victoria Basin forest-savanna mosaic	AT	682	689	34.3	35.6	5.75	6.91	1.01026	32.35	1.92	27	119	221	636	1003	0	1	3	1	2	3	3	9	5	17	0.0740741	0.0252101	0.0135747	0.0141509	0.0169492	203	2491	2288	1208.8	247.36	1191	15.4	17.8	26	29.5	21.82	0.49	14.1	4	75.4	156.4
AT0722	1.63186e+06	7	West Sudanian savanna	AT	3399	952	-17.48	13.85	14.65	15.67	0.280082	-1.84	11.59	25	129	175	565	894	2	6	2	0	4	27	3	7	10	41	0.16	0.209302	0.0171429	0.0123894	0.0458613	1	1313	1312	311.275	134.053	304	20.5	24.5	28.3	35.3	27.8	2.23	14.8	0	89.7	16.9
AT0723	411615	7	Western Congolian forest-savanna mosaic	AT	933	1087	11.16	19.14	-0.4	0.07	1.16506	14.91	-5.07	33	130	177	561	901	1	0	2	0	2	13	2	3	3	20	0.0606061	0.1	0.0112994	0.00534759	0.0221976	1	1493	1492	598.52	258.198	608	17.9	21.1	24.8	28.1	23.52	1.08	10.2	0	152.1	29.9
AT0724	33889.7	7	Western Zambezian grasslands	AT	193	223	22.71	24.49	-14.04	-12.72	1.15544	24.11	-13.84	29	49	141	370	589	0	0	0	0	0	3	0	1	0	4	0	0.0612245	0	0.0027027	0.00679117	965	1488	523	1062.86	57.0386	1049	16.2	23.6	18.4	26.1	22.18	2.61	9.9	0	157.9	1
AT0725	471874	7	Zambezian and Mopane woodlands	AT	1469	1401	35.29	36.8	-14.37	-10.41	0.95371	31.2	-21.04	50	165	196	556	967	0	2	0	1	0	31	7	1	3	39	0	0.187879	0.0357143	0.00179856	0.0403309	5	2054	2049	523.075	325.397	474	9.3	18.2	22	29.9	23.13	3.11	20.6	0	59.6	26.5
AT0726	263554	7	Zambezian Baikiaea woodlands	AT	1189	561	26.23	28.63	-13.98	-13.25	0.471825	17.86	-16.28	50	88	164	517	819	0	0	0	0	1	3	2	0	0	6	0.02	0.0340909	0.0121951	0	0.00732601	598	1358	760	1083.72	75.1761	1079	14.5	22.5	18.3	27.4	22.06	3.32	12.9	0	109.3	1
AT0801	25485.3	8	Al Hajar montane woodlands	AT	313	270	56.05	59.11	22.39	24.83	0.86262	56.65	23.61	0	0	27	70	97	0	0	1	0	0	0	0	2	1	2	#N/A	#N/A	0	0.0285714	0.0206186	197	3036	2839	719.046	393.524	612	11.1	26.8	20.3	33.9	25.09	5.68	22.8	0	21.8	4.7
AT0802	69.2351	8	Amsterdam and Saint-Paul Islands temperate grasslands	AT	9	10	77.5	77.59	-37.91	-37.82	1.11111	77.54	-37.86	0	0	0	0	0	0	0	0	0	0	0	0	0	0	0	#N/A	#N/A	#N/A	#N/A	#N/A	1	822	821	301.148	229.096	267	0	0	0	0	0	0	0	0	0	0
AT0803	167.432	8	Tristan Da Cunha-Gough Islands shrub and grasslands	AT	13	11	-10.04	-9.89	-37.15	-37.05	0.846154	-9.97	-40.35	0	0	0	6	6	0	0	0	1	0	0	6	0	1	6	#N/A	#N/A	#N/A	0	1	1	1759	1758	607.664	467.294	575	0	0	0	0	0	0	0	0	0	0
AT0901	2625.76	9	East African halophytics	AT	38	65	35.91	36.26	-2.69	-2.1	1.71053	36.09	-2.4	1	4	81	229	315	0	0	0	0	0	0	0	0	0	0	0	0	0	0	0	538	2806	2268	831.552	333.077	805	18.6	22.4	25.5	29.1	24.67	1.38	10.5	0	79.6	4.1
AT0902	7208.25	9	Etosha Pan halophytics	AT	135	89	15.8	17.08	-19.19	-18.39	0.659259	16.44	-18.79	1	11	75	218	305	0	0	0	0	0	1	0	0	0	1	0	0.0909091	0	0	0.00327869	1057	1130	73	1082.95	11.6178	1081	16	26.1	16.7	26.6	22.61	3.72	10.6	0	101.8	0
AT0903	45868.1	9	Inner Niger Delta flooded savanna	AT	544	441	-5.28	-0.19	13.23	17.18	0.810662	-4.29	15.21	4	16	62	298	380	0	0	0	0	0	0	2	0	0	2	0	0	0.0322581	0	0.00526316	230	394	164	265.919	14.8389	266	21.5	32.9	24	35.7	28.99	3.65	14.2	0	44.9	0.3
AT0904	18761.2	9	Lake Chad flooded savanna	AT	255	233	12.98	15.34	12.36	14.45	0.913725	14.76	13.4	3	16	73	309	401	0	0	0	0	0	0	2	2	0	4	0	0	0.0273973	0.00647249	0.00997506	259	677	418	306.677	79.3875	281	21.1	29.6	22.5	33.9	27.95	3.56	12.8	0	113.7	0
AT0905	178952	9	Saharan flooded grasslands	AT	640	577	27.82	33.64	4.78	9.96	0.901563	30.73	7.37	7	24	104	431	566	0	0	1	0	0	1	1	1	1	3	0	0.0416667	0.00961538	0.00232019	0.00530035	136	984	848	383.874	43.5608	393	25.5	29.3	27.1	32	28.25	1.47	6.5	0	130.8	9.8
AT0906	19483.7	9	Zambezian coastal flooded savanna	AT	183	165	35.39	37.12	-19.01	-17.53	0.901639	36.26	-18.27	21	57	88	313	479	0	1	0	0	0	2	1	0	1	3	0	0.0350877	0.0113636	0	0.00626305	1	213	212	27.4153	32.93	14	19.4	27	21	27.9	24.78	2.67	8.5	8.7	171.7	23.8
AT0907	152878	9	Zambezian flooded grasslands	AT	260	368	37.05	37.68	-5.28	-3.62	1.41538	23.01	-15.93	36	90	133	508	767	0	1	0	2	2	3	6	0	3	11	0.0555556	0.0333333	0.0451128	0	0.0143416	151	1878	1727	1001.86	212.96	1030	15.5	22.1	23.9	28.6	22.42	2.53	13.1	0	106.4	23.3
AT0908	30289.2	9	Zambezian halophytics	AT	210	250	33.21	34.05	-21.23	-19.83	1.19048	25.31	-20.53	1	11	57	259	328	0	0	0	0	0	0	0	0	0	0	0	0	0	0	0	1	936	935	668.11	382.928	898	15	25.5	19.1	27.6	22.58	3.79	12.6	0	82.5	19.2
AT1001	25418.5	10	Angolan montane forest-grassland mosaic	AT	191	345	15.99	16.19	-11.75	-10.87	1.80628	14.95	-12.42	34	45	110	367	556	1	0	0	0	2	8	7	3	1	20	0.0588235	0.177778	0.0636364	0.00817439	0.0359712	964	2590	1626	1652.57	219.289	1653	13.6	18.2	16.7	21.1	18.44	1.32	7.5	0	189.2	1.4
AT1002	74054.9	10	Angolan scarp savanna and woodlands	AT	257	951	13.19	14.6	-8.83	-5.91	3.70039	13.97	-10.18	32	50	112	394	588	1	1	0	3	5	9	16	0	5	30	0.15625	0.18	0.142857	0	0.0510204	1	2260	2259	336.701	337.612	175	16.2	20.4	22	27.9	23.66	2	11.7	0	111.9	3.2
AT1003	11893.6	10	Drakensberg alti-montane grasslands and woodlands	AT	221	302	27.35	29.65	-31.29	-28.58	1.36652	28.96	-29.94	18	29	72	299	418	0	2	0	0	2	9	7	0	2	18	0.111111	0.310345	0.0972222	0	0.0430622	1201	3484	2283	2417.55	477.403	2422	0.1	10.9	7	19.3	9.87	3.9	19.2	8	91.6	26.6
AT1004	201962	10	Drakensberg montane grasslands, woodlands and forests	AT	690	1103	29.28	32.31	-23.03	-22.32	1.59855	28.74	-28.63	47	118	154	467	786	0	9	1	0	6	37	10	3	10	56	0.12766	0.313559	0.0649351	0.00642398	0.0712468	1	3446	3445	1258.74	552.97	1258	0.8	11.8	18.3	27.8	15.88	3.62	27	0.9	39.6	48.5
AT1005	3273.29	10	East African montane moorlands	AT	46	70	37.15	37.56	1.07	1.23	1.52174	36.56	-0.45	12	9	74	522	617	1	1	0	1	2	2	8	5	3	17	0.166667	0.222222	0.108108	0.00957854	0.0275527	1609	5825	4216	3028.61	674.021	2868	3	6.5	11.7	15.5	9.7	1.24	12.5	7.7	134.8	102.6
AT1006	7804.11	10	Eastern Zimbabwe montane forest-grassland mosaic	AT	54	136	33.88	34.09	-18.3	-17.79	2.51852	32.8	-19.55	23	58	120	408	609	1	1	2	1	6	9	3	2	5	20	0.26087	0.155172	0.025	0.00490196	0.0328407	406	2401	1995	1326.89	325.93	1307	11.4	18	18.5	25.4	18.11	2.65	14	5.3	158.5	21.8
AT1007	244349	10	Ethiopian montane grasslands and woodlands	AT	559	1156	40.89	42.9	17.17	17.77	2.06798	38.78	10.9	33	57	127	538	755	1	0	1	4	5	12	15	13	6	45	0.151515	0.210526	0.11811	0.0241636	0.0596026	632	4361	3729	2119.13	435.066	2114	7.9	10	23.7	28.6	17.82	1.05	20.7	0.4	22.3	50.2
AT1008	25049.1	10	Ethiopian montane moorlands	AT	175	116	39.92	40.38	13.02	13.37	0.662857	39.58	6.84	29	17	89	435	570	1	0	5	0	5	3	7	14	6	29	0.172414	0.176471	0.0786517	0.0321839	0.0508772	915	4502	3587	2903.13	539.781	2931	5.9	8	20.7	23.7	13.67	0.94	17.8	3.6	102.5	41.9
AT1009	185863	10	Highveld grasslands	AT	583	714	24.62	30.49	-31.42	-24.99	1.2247	27.56	-28.21	29	68	116	409	622	0	1	1	1	0	7	4	1	3	12	0	0.102941	0.0344828	0.00244499	0.0192926	879	2904	2025	1503.51	156.073	1500	5	17.2	12	24.6	16.08	4.72	19.6	1.9	73.1	21.2
AT1010	13281.3	10	Jos Plateau forest-grassland mosaic	AT	143	172	8.37	9.68	9.06	10.61	1.2028	9.03	9.84	16	61	54	61	192	0	0	0	1	0	9	2	2	1	13	0	0.147541	0.037037	0.0327869	0.0677083	509	1680	1171	1047.67	216.334	1062	19.7	23.8	22.8	28.5	23.12	1.61	8.8	0	253.1	2.3
AT1011	1273.47	10	Madagascar ericoid thickets	AT	28	50	49.71	49.77	-14.18	-13.84	1.78571	47.05	-19.5	22	22	30	117	191	0	0	0	0	9	8	6	3	0	26	0.409091	0.363636	0.2	0.025641	0.136126	934	2864	1930	1927.01	248.827	1914	11.6	17.9	17.6	21.9	16.62	2.26	10.3	0	297.5	0
AT1012	19515	10	Maputaland-Pondoland bushland and thickets	AT	154	94	31.2	31.77	-28.95	-28.46	0.61039	28.87	-31.12	38	64	93	363	558	0	1	0	0	8	6	5	2	1	21	0.210526	0.09375	0.0537634	0.00550964	0.0376344	1	1775	1774	665.66	317.301	658	10.8	20.2	17.5	24.8	17.99	2.99	14	5.1	59	45.5
AT1013	2661.32	10	Rwenzori-Virunga montane moorlands	AT	58	73	29.73	30.2	0.08	0.74	1.25862	29.97	0.41	4	9	67	448	528	1	0	1	0	1	2	6	1	2	10	0.25	0.222222	0.0895522	0.00223214	0.0189394	1218	4657	3439	2580.36	696.595	2420	6.7	7.7	17.6	18.7	13.82	0.31	12	39.3	154.8	92.6
AT1014	10191.4	10	South Malawi montane forest-grassland mosaic	AT	135	132	34.53	35.79	-16.27	-15.08	0.977778	35.16	-15.67	34	37	136	418	625	1	0	0	0	6	10	5	1	1	22	0.176471	0.27027	0.0367647	0.00239234	0.0352	50	2969	2919	694.24	398.173	702	13.5	19.8	21.2	29.1	22.58	2.52	15.6	2.5	191.8	25.3
AT1015	33360.4	10	Southern Rift montane forest-grassland mosaic	AT	235	165	34.67	35.26	-8.06	-7.76	0.702128	34.19	-9.3	48	46	163	496	753	1	3	0	0	5	13	17	4	4	39	0.104167	0.282609	0.104294	0.00806452	0.0517928	472	2935	2463	1461.29	363.054	1461	11.3	17.4	22	27	19.26	2.05	15.7	0	183.2	18.9
AT1201	17083.5	12	Albany thickets	AT	241	192	25.3	26.63	-33.09	-32.24	0.79668	23.79	-33.14	14	56	69	290	429	0	1	0	0	1	7	3	1	1	12	0.0714286	0.125	0.0434783	0.00344828	0.027972	1	1616	1615	505.416	287.378	502	9	20.2	15.1	24.2	17.27	3.79	15.2	8	31.8	44
AT1202	32744.1	12	Lowland fynbos and renosterveld	AT	312	278	24.88	25.7	-32.43	-31.66	0.891026	18.5	-32.91	27	69	75	304	475	1	2	1	0	9	22	13	5	4	49	0.333333	0.318841	0.173333	0.0164474	0.103158	1	1323	1322	170.091	146.178	138	9.8	18.7	14.3	24.4	17.05	3.43	14.6	3.7	32.6	67.3
AT1203	45779.8	12	Montane fynbos and renosterveld	AT	641	365	23.41	25.46	-29.86	-29.32	0.569423	19.32	-32.75	31	74	88	324	517	4	8	0	0	11	30	11	6	12	58	0.354839	0.405405	0.125	0.0185185	0.112186	1	2355	2354	790.193	400.094	769	5.8	18.4	12.9	24.4	15.73	3.99	18.6	1.7	15.5	72.7
AT1301	159.481	13	Aldabra Island xeric scrub	AT	35	14	46.28	46.52	-9.35	-9.34	0.4	46.46	-9.41	0	10	6	45	61	0	3	0	1	0	5	6	0	4	11	#N/A	0.5	1	0	0.180328	656	739	83	696.747	26.904	691	0	0	0	0	0	0	0	0	0	0
AT1302	82689	13	Arabian Peninsula coastal fog desert	AT	1358	1093	45.7	58.38	16.75	22.4	0.80486	54.8	17.14	0	0	61	244	305	0	0	0	0	0	0	2	3	0	5	#N/A	#N/A	0.0327869	0.0122951	0.0163934	1	1774	1773	178.053	246.754	92	15	26.4	25.9	35.8	28.05	3.52	20.8	0	3.6	14
AT1303	27774.6	13	East Saharan montane xeric woodlands	AT	234	219	24.19	24.62	15.89	17.86	0.935897	22.97	16.88	2	7	69	247	325	0	0	0	0	0	0	1	3	0	4	0	0	0.0144928	0.0121457	0.0123077	658	2993	2335	1064.46	234.61	1009	14.7	23.7	20	31.1	24.23	4.46	16.4	0.1	57.1	8
AT1304	4576.83	13	Eritrean coastal desert	AT	143	185	43.14	43.42	13.65	13.66	1.29371	42.76	12.83	5	25	51	229	310	0	0	0	0	0	2	0	0	0	2	0	0.08	0	0	0.00645161	1	695	694	94.2108	111.941	47	24.4	33.2	26.1	35	29.85	3.19	10.6	0.2	9.5	1.9
AT1305	151869	13	Ethiopian xeric grasslands and shrublands	AT	1021	919	43.45	47.65	18.14	18.2	0.900098	40.83	14.04	6	79	76	383	544	0	0	1	1	1	20	4	6	2	31	0.166667	0.253165	0.0526316	0.0156658	0.0569853	-169	2305	2474	358.761	291.297	347	17.9	25.8	26.6	35.9	28.04	2.92	18	0.3	2.3	29.3
AT1306	62297.2	13	Gulf of Oman desert and semi-desert	AT	541	672	58.63	59.85	24.27	26.38	1.24214	58.39	23.37	0	0	38	256	294	0	0	0	0	0	0	0	2	0	2	#N/A	#N/A	0	0.0078125	0.00680272	1	2137	2136	274.9	304.176	200	13.6	27.1	22	35.7	26.82	5.29	22.1	0	11	3.3
AT1307	25454.5	13	Hobyo grasslands and shrublands	AT	512	557	44.52	49.14	1.53	6.54	1.08789	47.33	4.03	15	22	58	154	249	0	2	1	2	0	6	3	4	5	13	0	0.272727	0.0517241	0.025974	0.0522088	1	374	373	135.419	46.3825	143	25.3	28	27	29.6	27.19	0.82	4.3	0.1	44	5
AT1308	21.7207	13	Ile Europa and Bassas da India xeric scrub	AT	7	6	40.32	40.39	-22.37	-22.31	0.857143	40.34	-22.34	0	0	0	0	0	0	0	0	0	0	0	0	0	0	0	#N/A	#N/A	#N/A	#N/A	#N/A	1	1	0	1	0	1	0	0	0	0	0	0	0	0	0	0
AT1309	586846	13	Kalahari xeric savanna	AT	1073	1092	15.49	26.09	-29.23	-19.39	1.01771	20.79	-24.31	15	104	100	339	558	0	2	0	0	1	8	0	1	2	10	0.0666667	0.0769231	0	0.00294985	0.0179211	748	2471	1723	1184.03	199.547	1140	8.5	22.8	16.3	28.4	20.04	5.11	19.9	0	32.5	9.3
AT1310	45584.9	13	Kaokoveld desert	AT	215	849	11.72	13.77	-16.8	-12.58	3.94884	11.97	-16.39	16	63	59	238	376	0	6	0	0	1	27	2	2	6	32	0.0625	0.428571	0.0338983	0.00840336	0.0851064	1	1295	1294	370.594	247.321	334	12.5	18.3	19.2	26.3	18.46	2.13	13.8	0	11.4	1.8
AT1311	43294.4	13	Madagascar spiny thickets	AT	367	400	46.09	46.83	-22.1	-22.02	1.08992	43.99	-23.81	9	89	43	159	300	0	10	0	7	2	39	15	4	17	60	0.222222	0.438202	0.348837	0.0251572	0.2	1	1199	1198	201.679	123.952	182	16.8	23.5	21.1	27.7	22.76	2.52	10.9	0	101.6	75.3
AT1312	79496.4	13	Madagascar succulent woodlands	AT	308	551	44.44	46.24	-19.88	-19.82	1.78896	44.74	-22.3	5	61	36	153	255	0	3	1	0	0	15	7	5	4	27	0	0.245902	0.194444	0.0326797	0.105882	1	1447	1446	408.544	245.117	378	14.8	21.7	21.6	27.7	22.35	2.53	12.9	0	125	57.1
AT1313	100505	13	Masai xeric grasslands and shrublands	AT	542	491	36.57	40.26	3.47	4.77	0.905904	37.82	2.56	10	28	102	343	483	2	0	0	0	3	6	1	4	2	14	0.3	0.214286	0.00980392	0.0116618	0.0289855	1	2300	2299	490.515	194.601	472	21.1	24	28.3	30.7	27.02	0.96	9.6	1	57.1	28.2
AT1314	350726	13	Nama Karoo	AT	1071	781	23.9	26.89	-32.26	-26.55	0.729225	21.41	-30.07	11	72	106	309	498	0	2	1	2	0	16	8	8	5	32	0	0.222222	0.0754717	0.02589	0.064257	10	2244	2234	1051.23	270.125	1032	5.6	18.6	14.5	28.5	17.54	5.2	22.9	0	8.4	33
AT1315	80688.9	13	Namib desert	AT	410	798	14.96	17.2	-26.3	-19.93	1.94634	15.18	-23.52	7	68	40	192	307	0	2	0	1	1	28	6	6	3	41	0.142857	0.411765	0.15	0.03125	0.13355	1	2577	2576	582.216	390.939	531	10.5	18.5	17.9	25.5	18.07	2.49	15	0	0	4.5
AT1316	224903	13	Namibian savanna woodlands	AT	733	1577	12.06	19.23	-27.03	-12.87	2.15143	14.64	-19.95	13	118	108	313	552	0	3	1	1	2	32	7	9	5	50	0.153846	0.271186	0.0648148	0.028754	0.0905797	80	2357	2277	1090.1	329.852	1099	10.5	17.5	18.4	27.7	19.3	3.29	17.2	0	17.9	6.1
AT1318	3803.24	13	Socotra Island xeric shrublands	AT	133	46	53.3	54.53	12.3	12.71	0.345865	53.92	12.51	0	29	2	79	110	0	16	0	2	0	24	6	0	18	30	#N/A	0.827586	3	0	0.272727	1	1497	1496	307.173	246.72	267	22.3	27.9	24.1	29.7	26.07	1.81	7.4	7.2	22.7	11.1
AT1319	62374.8	13	Somali montane xeric woodlands	AT	499	502	46.85	51.41	9.5	11.98	1.00601	45.01	9.72	13	44	60	172	289	0	1	0	3	0	14	5	5	4	24	0	0.318182	0.0833333	0.0290698	0.083045	1	2441	2440	639.89	523.265	425	15.4	21.8	25.8	32.1	25.75	2.22	16.7	0	6	11.8
AT1320	273758	13	Southwestern Arabian foothills savanna	AT	1753	1343	37.97	54.67	12.96	25	0.766115	41.96	18.98	0	0	64	210	274	0	0	0	0	0	0	4	4	0	8	#N/A	#N/A	0.0625	0.0190476	0.0291971	1	3341	3340	993.946	567.158	1028	11.5	21.2	25.5	35.7	24.8	4.09	24.2	0	4	14.6
AT1321	86631.8	13	Southwestern Arabian montane woodlands	AT	650	937	39.77	45.96	13.75	22.13	1.44154	43.64	17.94	0	0	48	116	164	0	0	0	3	0	0	7	3	3	10	#N/A	#N/A	0.145833	0.0258621	0.0609756	144	3623	3479	1781.11	508.601	1827	10.9	19.9	23	34.4	20.96	4.17	23.5	0	13	13.4
AT1322	102585	13	Succulent Karoo	AT	648	841	23.27	23.61	-26.61	-26.4	1.29784	17.44	-30.16	15	94	80	230	419	0	7	1	1	3	39	5	7	9	54	0.2	0.414894	0.0625	0.0304348	0.128878	1	1903	1902	573.768	365.781	521	5.1	17.7	14.6	26.8	16.81	3.66	21.7	0	2.9	47.5
AT1401	30791.1	14	Central African mangroves	AT	671	259	12.94	13.15	5.76	6.61	0.385991	5.5	5.44	2	9	29	223	263	0	0	0	0	0	2	3	0	0	5	0	0.222222	0.103448	0	0.0190114	1	533	532	106.489	113.255	63	21.7	25.7	25.5	29.1	26.13	1.04	7.4	0	121	231.1
AT1402	16012.9	14	East African mangroves	AT	161	145	42.55	42.56	-0.37	-0.36	0.900621	35.44	-19.31	2	9	27	239	277	0	0	0	0	0	0	1	0	0	1	0	0	0.037037	0	0.00361011	1	231	230	16.2839	25.7644	8	19.8	26.5	25.7	29.1	25.53	1.93	9.3	2.6	50.6	65
AT1403	23418.9	14	Guinean mangroves	AT	213	140	-3.63	-3.03	13.91	14.2	0.657277	-15.82	12.05	2	8	33	197	240	0	0	0	0	0	1	0	0	0	1	0	0.125	0	0	0.00416667	1	310	309	27.1817	29.5889	20	23.7	26.4	26.9	29.8	26.86	0.88	6.1	0	146.4	42.4
AT1404	5188.06	14	Madagascar mangroves	AT	60	74	48.32	48.42	-13.71	-13.53	1.23333	44.08	-17.38	1	2	4	127	134	0	0	0	0	0	0	7	0	0	7	0	0	1.75	0	0.0522388	1	589	588	49.6051	60.836	22	21.2	26.8	24.2	27.8	25.87	1.53	6.6	0	169.3	28.3
AT1405	992.556	14	Southern Africa mangroves	AT	17	28	32.76	32.9	-27.03	-26.78	1.64706	31.02	-29.83	2	6	27	233	268	0	0	0	0	0	0	1	0	0	1	0	0	0.037037	0	0.00373134	1	410	409	59.8903	67.5238	38	17.9	25.3	17.9	25.3	21.88	2.75	7.4	56	164	56
IM0101	5695.61	1	Andaman Islands rain forests	IM	62	233	94.27	94.3	14.85	14.92	3.75806	92.81	12.53	0	0	27	123	150	0	0	4	6	0	0	12	5	10	17	#N/A	#N/A	0.444444	0.0406504	0.113333	1	710	709	47.234	71.3893	16	25.1	27.5	26.3	28.4	26.66	0.67	3.3	3.4	421.9	24.4
IM0102	425583	1	Borneo lowland rain forests	IM	1143	1234	118.72	119.27	7.19	7.36	1.07962	112.82	1.49	0	0	193	467	660	0	0	3	4	0	0	17	12	7	29	#N/A	#N/A	0.0880829	0.0256959	0.0439394	1	1943	1942	206.544	176.412	149	22.2	23.4	27.6	28.5	26.09	0.25	6.3	58.7	159.8	284.1
IM0103	115078	1	Borneo montane rain forests	IM	479	573	117.51	118.03	4.27	5.03	1.19624	113.89	2.07	0	0	147	256	403	0	0	0	0	0	0	28	11	0	39	#N/A	#N/A	0.190476	0.0429688	0.0967742	1	2559	2558	767.877	382.745	711	18.9	19.6	25.5	26.9	23.77	0.25	8	117.1	187	221.8
IM0104	67171.5	1	Borneo peat swamp forests	IM	303	251	118.19	118.58	5	5.05	0.828383	111.3	2.04	0	0	153	396	549	0	0	0	0	0	0	1	5	0	6	#N/A	#N/A	0.00653595	0.0126263	0.010929	1	809	808	55.2594	58.4001	41	25.2	26.2	27.4	28.5	26.78	0.29	3.3	83	181.8	248.9
IM0105	56612.7	1	Brahmaputra Valley semi-evergreen forests	IM	643	277	89.82	96.28	25.66	28.21	0.430793	94.31	26.93	12	5	122	372	511	0	0	0	0	2	0	2	2	0	6	0.166667	0	0.0163934	0.00537634	0.0117417	3	1800	1797	116.987	111.046	93	12	24.7	17.7	28.8	23.53	4.34	16.8	3	329.8	21.8
IM0106	44074.3	1	Cardamom Mountains rain forests	IM	360	361	104.34	104.63	11.95	13.73	1.00278	102.97	11.69	14	64	103	324	505	2	2	0	2	2	8	2	0	6	12	0.142857	0.125	0.0194175	0	0.0237624	1	1680	1679	248.15	259.294	147	21.3	24.3	26	30.1	26.33	1.01	8.8	5.3	288.8	39.2
IM0107	38858.3	1	Chao Phraya freshwater swamp forests	IM	255	475	99.47	101.83	12.97	17.25	1.86275	100.65	15.11	12	52	123	307	494	0	0	2	0	0	5	1	3	2	9	0	0.0961538	0.00813008	0.00977199	0.0182186	1	723	722	22.367	25.5709	15	24	29.5	26.2	31.8	28.24	1.76	7.8	4.7	206.6	9.3
IM0108	20337.1	1	Chao Phraya lowland moist deciduous forests	IM	171	244	101.45	102.2	13.41	15.23	1.4269	99.71	14.32	0	0	137	368	505	0	0	0	0	0	0	0	1	0	1	#N/A	#N/A	0	0.00271739	0.0019802	1	907	906	113.918	151.185	65	20.5	26	26	31.3	27.22	1.41	10.8	5.3	187.8	51.2
IM0109	29616.9	1	Chin Hills-Arakan Yoma montane forests	IM	195	623	93.02	94.9	18.49	24.09	3.19487	93.96	21.29	1	3	102	414	520	0	0	0	0	0	0	3	0	0	3	0	0	0.0294118	0	0.00576923	83	2951	2868	1187.4	467.541	1145	11	18.7	20.7	28.1	20.08	2.85	17.1	2.6	400.1	11.6
IM0110	133.964	1	Christmas and Cocos Islands tropical forests	IM	13	14	105.63	105.75	-10.51	-10.38	1.07692	105.69	-10.45	0	5	0	19	24	0	0	0	2	0	0	2	0	2	2	#N/A	0	#N/A	0	0.0833333	1	290	289	64	69.6266	39	0	0	0	0	0	0	0	0	0	0
IM0111	340171	1	Eastern highlands moist deciduous forests	IM	974	797	77.84	87.29	16.35	23.51	0.818275	81.42	19.93	11	22	81	313	427	0	1	1	0	0	2	1	1	2	4	0	0.0909091	0.0123457	0.00319489	0.00936768	1	1541	1540	400.576	247.599	361	14	26.7	23.8	35.4	25.84	4.07	21.4	1.9	168.8	22.9
IM0112	15829.3	1	Eastern Java-Bali montane rain forests	IM	241	101	114.59	115.72	-8.21	-7.5	0.419087	113.36	-8.02	0	0	96	213	309	0	0	0	0	0	0	18	1	0	19	#N/A	#N/A	0.1875	0.00469484	0.0614887	1	3631	3630	816.912	517.94	659	19.2	21.3	25.5	27.6	24.1	0.57	8.4	10.7	295.3	119.7
IM0113	53666.3	1	Eastern Java-Bali rain forests	IM	478	265	116.23	116.26	-5.76	-5.72	0.554393	112.43	-7.59	0	0	99	346	445	0	0	0	0	0	0	10	2	0	12	#N/A	#N/A	0.10101	0.00578035	0.0269663	1	1502	1501	144.557	137.408	114	23.8	25.4	27.5	29.4	26.79	0.45	5.6	0.7	230.8	98.1
IM0114	34855.9	1	Greater Negros-Panay rain forests	IM	144	219	124.02	124.07	12.91	12.96	1.52083	122.98	10.02	23	78	58	283	442	4	9	4	9	13	36	23	13	26	85	0.565217	0.461538	0.396552	0.0459364	0.192308	1	2257	2256	222.1	256.533	114	22.5	24.8	26.4	29.2	26.63	0.75	6.7	12.7	199.8	89.6
IM0115	38124.7	1	Himalayan subtropical broadleaf forests	IM	747	305	91.51	92.12	29.04	29.77	0.4083	82.27	28.07	2	2	97	343	444	0	0	0	0	0	1	1	1	0	3	0	0.5	0.0103093	0.00291545	0.00675676	75	4036	3961	563.566	437.153	538	-1.5	13.6	16	32	21.46	5.28	33.5	2.2	213.1	22.1
IM0116	15106.8	1	Irrawaddy freshwater swamp forests	IM	211	138	94.68	96.65	16.26	17.5	0.654028	95.66	16.88	1	8	53	269	331	0	0	0	0	0	2	0	0	0	2	0	0.25	0	0	0.0060423	1	48	47	10.3564	5.01529	10	23.8	29.6	25.1	30.8	27.26	1.66	7	1.3	591.4	2.5
IM0117	137910	1	Irrawaddy moist deciduous forests	IM	369	820	97.36	98.36	17.6	24.96	2.22222	96.06	20.26	11	50	118	342	521	0	0	0	0	0	13	1	0	0	14	0	0.26	0.00847458	0	0.0268714	1	1417	1416	215.529	166.701	177	15.8	25.4	24.1	31.7	25.63	2.93	15.9	0.9	153	9.1
IM0118	662292	1	Jian Nan subtropical evergreen forests	IM	1573	925	122.03	122.18	29.65	30.11	0.588048	114.19	26.03	105	164	164	583	1016	4	3	0	0	15	10	0	1	7	26	0.142857	0.0609756	0	0.00171527	0.0255906	1	2425	2424	412.658	295.045	345	1.3	22.2	15.1	30.1	18.15	7.25	28.8	16.3	171.7	56
IM0119	119158	1	Kayah-Karen montane rain forests	IM	383	806	96.3	99.96	14.14	21.38	2.10444	98.13	17.76	40	105	168	568	881	4	5	1	1	5	14	2	1	11	22	0.125	0.133333	0.0119048	0.00176056	0.0249716	2	2541	2539	711.041	337.883	693	15.6	22.6	23.7	30.4	23.68	2.33	14.8	1.5	195.1	14
IM0120	253509	1	Lower Gangetic Plains moist deciduous forests	IM	1003	732	82.73	92.62	20.74	27.34	0.729811	87.67	24.04	15	33	126	383	557	0	0	1	0	0	8	0	1	1	9	0	0.242424	0	0.00261097	0.016158	1	761	760	42.8569	56.2593	30	15.4	26.7	20.9	33.5	25.43	4.38	18.1	1.7	261.3	19.2
IM0121	71585	1	Luang Prabang montane rain forests	IM	409	464	100.56	104.45	15.98	20.15	1.13447	101.55	18.06	0	0	131	541	672	0	0	0	0	0	0	0	0	0	0	#N/A	#N/A	0	0	0	125	2706	2581	761.079	391.3	718	14.1	22	23.2	30.1	23.54	2.64	16	3.6	197.1	19.1
IM0122	8272.78	1	Luzon montane rain forests	IM	146	217	121.28	122.31	17.8	18.46	1.4863	122.25	16.82	10	33	34	163	240	0	0	0	0	3	19	28	9	0	59	0.3	0.575758	0.823529	0.0552147	0.245833	64	2212	2148	857.337	306.843	850	19.4	23.4	24.2	27.2	23.3	1.37	7.8	2.5	217.3	98.5
IM0123	94876.8	1	Luzon rain forests	IM	481	677	124.31	124.42	20.69	20.84	1.40748	122.08	16.61	24	93	78	365	560	2	7	2	5	12	49	40	15	16	116	0.5	0.526882	0.512821	0.0410959	0.207143	1	2054	2053	219.8	241.817	110	18.6	22.2	26	30.1	26.02	1.25	11.5	1.3	163.7	151.9
IM0124	35330.6	1	Malabar Coast moist forests	IM	526	1138	76.55	77.78	18.26	19.97	2.1635	74.89	13.19	20	33	97	280	430	2	2	1	0	5	11	1	6	5	23	0.25	0.333333	0.0103093	0.0214286	0.0534884	1	1616	1615	58.1427	74.857	38	23	25.3	27	30.5	27.06	1.1	7.5	0	68.9	23.6
IM0125	542.136	1	Maldives-Lakshadweep-Chagos Archipelago tropical moist forests	IM	23	23	120.31	120.42	13.87	13.9	1	120.18	13.77	0	10	0	57	67	0	0	0	0	0	0	0	0	0	0	#N/A	0	#N/A	0	0	1	599	598	74.2835	104.576	26	0	28.4	0	28.4	24.61	7.8	28.4	0	0	0
IM0126	41629.3	1	Meghalaya subtropical forests	IM	411	191	89.82	93.92	24.93	26.64	0.46472	91.87	25.79	35	42	113	443	633	3	2	0	0	6	12	5	0	5	23	0.171429	0.285714	0.0442478	0	0.0363349	1	1954	1953	494.694	423.675	340	10.4	20.4	17.8	28.6	22.07	3.86	18.2	2.7	258.5	16.2
IM0127	6469.63	1	Mentawai Islands rain forests	IM	79	100	102.1	102.4	-1.82	-0.91	1.26582	98.94	-1.36	0	0	44	212	256	0	0	6	2	0	0	3	17	8	20	#N/A	#N/A	0.0681818	0.0801887	0.078125	1	367	366	83.3747	60.8073	87	25.4	26.6	26.8	27.8	26.56	0.31	2.4	159.2	330.9	184.3
IM0128	18120.2	1	Mindanao montane rain forests	IM	175	231	125.93	126.45	8.79	9.45	1.32	124.72	7.89	25	42	49	173	289	0	0	2	7	12	25	41	15	9	93	0.48	0.595238	0.836735	0.0867052	0.321799	6	2794	2788	1046.33	363.427	999	18.9	20.2	24.3	25.5	22.5	0.41	6.6	71.8	175.3	262.6
IM0129	104667	1	Mindanao-Eastern Visayas rain forests	IM	519	474	126.01	126.6	12.64	12.69	0.913295	125.83	7.69	37	93	77	327	534	2	3	4	0	23	42	38	17	9	120	0.621622	0.451613	0.493506	0.0519878	0.224719	1	1394	1393	234.182	218.647	171	21.4	24	26.9	28.7	26.12	0.51	7.3	55	138.6	285.8
IM0130	10079	1	Mindoro rain forests	IM	136	147	121.54	121.59	12.21	13.53	1.08088	120.94	12.68	14	40	42	238	334	1	0	1	0	5	14	11	8	2	38	0.357143	0.35	0.261905	0.0336134	0.113772	1	2399	2398	371.631	424.972	199	20.5	22.7	26.8	28.9	25.41	0.75	8.4	13.4	280.2	48.8
IM0131	135245	1	Mizoram-Manipur-Kachin rain forests	IM	595	1039	91.91	97.8	17.59	26.93	1.74622	92.82	22.26	16	58	149	580	803	2	1	1	0	4	7	6	2	4	19	0.25	0.12069	0.0402685	0.00344828	0.0236613	1	3464	3463	521.785	456.033	343	5.6	16.8	21.7	29.4	22.51	3.49	23.8	1.5	278.5	19.4
IM0132	66332.2	1	Myanmar coastal rain forests	IM	589	618	98.53	98.99	20.29	21.48	1.04924	96.22	18.72	3	58	124	357	542	0	3	0	0	0	12	0	1	3	13	0	0.206897	0	0.00280112	0.0239852	1	993	992	78.618	104.8	32	19.7	27	25.9	31	26.35	1.76	11.3	1	372.5	20.6
IM0133	1688.34	1	Nicobar Islands rain forests	IM	33	54	93.64	93.94	9.12	9.25	1.63636	93.32	8	0	0	21	82	103	0	0	1	0	0	0	9	4	1	13	#N/A	#N/A	0.428571	0.0487805	0.126214	1	650	649	96.3698	86.7842	77	25.8	27.4	26.3	28.1	26.62	0.51	2.3	82	273.3	85.7
IM0134	48043.6	1	North Western Ghats moist deciduous forests	IM	398	1045	72.71	76.4	12.47	21.88	2.62563	73.53	17.17	9	23	88	346	466	1	0	0	0	4	9	5	0	1	18	0.444444	0.391304	0.0568182	0	0.0386266	1	1812	1811	405.943	312.141	346	19.4	24.8	25.5	32.9	25.66	2.03	13.5	0	80.4	3
IM0135	30824.7	1	North Western Ghats montane rain forests	IM	298	868	73.22	75.99	12.48	20.3	2.91275	73.95	16.39	50	11	89	327	477	11	0	1	0	33	5	8	2	12	48	0.66	0.454545	0.0898876	0.00611621	0.100629	4	1890	1886	543.532	290.159	581	19.2	24.3	25.8	31	24.72	1.64	11.8	0	294.1	1.6
IM0136	47052.6	1	Northern Annamites rain forests	IM	355	332	103.53	106.89	16.25	19.24	0.935211	105.21	17.75	0	0	106	524	630	0	0	4	1	0	0	6	5	5	11	#N/A	#N/A	0.0566038	0.00954198	0.0174603	12	2207	2195	473.376	312.955	395	15	22.6	21.6	28.9	24.02	2.84	13.9	3.6	250.1	43.8
IM0137	435869	1	Northern Indochina subtropical forests	IM	990	909	96.13	105.7	18.97	27.14	0.918182	100.91	23.05	38	114	272	785	1209	5	8	3	0	11	20	1	12	16	44	0.289474	0.175439	0.00367647	0.0152866	0.0363937	7	4234	4227	1107.79	519.947	1055	2.1	14.8	20	30.9	20.6	3.7	28.8	1.7	153.8	33.3
IM0138	16794.3	1	Northern Khorat Plateau moist deciduous forests	IM	311	203	101.93	104.86	16.84	18.67	0.652733	102.69	17.75	0	0	103	390	493	0	0	0	0	0	0	0	0	0	0	#N/A	#N/A	0	0	0	127	871	744	204.868	81.0994	177	20.4	27.7	22.4	29.8	26.32	2.58	9.4	2.9	247.6	7.6
IM0139	42010.1	1	Northern Thailand-Laos moist deciduous forests	IM	476	473	98.68	103.21	16.46	20.7	0.993697	100.95	18.58	0	0	134	379	513	0	0	0	0	0	0	0	0	0	0	#N/A	#N/A	0	0	0	51	1692	1641	491.635	242.391	457	17.2	25.1	23.9	31	25.04	2.58	13.8	3.8	181.7	20.5
IM0140	53773.7	1	Northern Triangle subtropical forests	IM	344	279	95.16	98.6	25.08	27.59	0.811047	96.88	26.34	22	36	139	372	569	5	0	3	0	7	4	1	9	8	21	0.318182	0.111111	0.00719424	0.0241935	0.0369069	120	3921	3801	908.54	697.019	628	4	16.1	16.4	27.8	19.92	4.36	23.8	10.2	189.6	18.5
IM0141	22521.9	1	Northern Vietnam lowland rain forests	IM	388	517	108.64	108.67	16.53	20.67	1.33247	105.81	18.34	4	21	110	306	441	1	0	0	0	1	1	4	1	1	7	0.25	0.047619	0.0363636	0.00326797	0.015873	1	1149	1148	87.0608	136.406	30	17.6	25.7	20.8	29.7	25.17	3.51	12.1	18.6	238.4	52.5
IM0142	22227.6	1	Orissa semi-evergreen forests	IM	254	266	84.57	87	19.04	21.43	1.04724	85.78	20.23	15	25	59	215	314	0	0	0	0	0	6	0	0	0	6	0	0.24	0	0	0.0191083	1	844	843	49.5111	70.4335	22	20.7	29.3	22.3	32.1	26.95	3.17	11.4	3.9	206	7.3
IM0143	14278.4	1	Palawan rain forests	IM	279	344	121	121.08	12.26	12.33	1.23297	119.01	10.07	22	59	54	246	381	4	5	6	6	9	14	21	15	21	59	0.409091	0.237288	0.388889	0.0609756	0.154856	1	1950	1949	186.918	241.453	96	23.6	25.2	26.8	28.6	26.51	0.56	5	4.4	191	51.3
IM0144	17097.5	1	Peninsular Malaysian montane rain forests	IM	151	331	102.83	102.97	5.24	6.11	2.19205	101.41	4.62	38	84	175	258	555	4	5	0	0	13	18	5	1	9	37	0.342105	0.214286	0.0285714	0.00387597	0.0666667	1	2146	2145	786.439	368.251	754	21	22.1	26	27.5	24.26	0.48	6.5	59	268.8	186
IM0145	3610.13	1	Peninsular Malaysian peat swamp forests	IM	44	89	104.2	104.22	3.52	3.81	2.02273	103.31	3.11	9	0	183	381	573	0	0	0	0	1	0	0	0	0	1	0.111111	#N/A	0	0	0.0017452	2	88	86	27.8685	16.26	26	25.5	27.3	26.9	28.1	26.94	0.55	2.6	110.8	253.2	163.1
IM0146	124944	1	Peninsular Malaysian rain forests	IM	448	625	106.4	106.43	5.9	6.89	1.39509	102.28	4.08	54	140	193	452	839	4	3	0	0	11	14	0	0	7	25	0.203704	0.1	0	0	0.0297974	1	1259	1258	131.848	154.016	66	23.3	25	27.3	28.8	26.51	0.52	5.5	26.4	218	218.3
IM0147	10724.1	1	Red River freshwater swamp forests	IM	193	173	104.89	106.75	20.08	21.63	0.896373	105.82	20.86	9	17	77	276	379	0	0	0	0	0	0	0	0	0	0	0	0	0	0	0	1	1056	1055	18.5557	40.0985	10	16.2	29.3	18.2	30.6	24.36	4.71	14.4	18.1	296	26.9
IM0148	30.5365	1	South China Sea Islands	IM	3	2	115.83	115.86	16.97	16.99	0.666667	115.83	10.72	0	2	0	0	2	0	0	0	0	0	0	0	0	0	0	#N/A	0	#N/A	#N/A	0	1	1	0	1	0	1	0	0	0	0	0	0	0	0	0	0
IM0149	223724	1	South China-Vietnam subtropical evergreen forests	IM	1238	433	117.31	117.51	24.69	24.75	0.349758	108.12	22.15	65	142	173	673	1053	3	3	0	0	14	10	0	3	6	27	0.215385	0.0704225	0	0.00445765	0.025641	1	1786	1785	195.945	230.749	105	10.2	24.1	21.3	30.5	22.22	5.32	20.3	9.2	164.1	55.8
IM0150	23675.7	1	South Western Ghats moist deciduous forests	IM	273	488	75.13	77.64	8.35	12.73	1.78755	77.03	10.54	18	37	90	323	468	1	0	0	0	11	15	9	6	1	41	0.611111	0.405405	0.1	0.0185759	0.0876068	7	2505	2498	553.934	400.898	474	16.1	20	26.5	30.9	24.93	1.32	14.8	1.5	172.1	24
IM0151	22545	1	South Western Ghats montane rain forests	IM	258	474	75.13	77.5	8.5	12.76	1.83721	76.73	10.63	63	79	96	309	547	7	29	2	3	36	72	13	10	41	131	0.571429	0.911392	0.135417	0.0323625	0.239488	4	2612	2608	732.907	550.991	742	14.6	18.5	26.4	30.3	23.73	1.23	15.7	0.9	193.9	24.1
IM0152	46313.5	1	Southern Annamites montane rain forests	IM	295	317	117.83	117.84	20.71	20.72	1.07458	107.36	15.23	0	0	110	414	524	0	0	0	5	0	0	10	3	5	13	#N/A	#N/A	0.0909091	0.00724638	0.0248092	43	2440	2397	922.628	322.827	901	14.9	20.3	22.2	27.8	22.11	1.93	12.9	6.8	200.6	48.7
IM0153	36602.9	1	Southwest Borneo freshwater swamp forests	IM	200	350	116.41	117.11	0.72	2	1.75	116.59	0.42	0	0	125	361	486	0	0	0	0	0	0	1	0	0	1	#N/A	#N/A	0.008	0	0.00205761	1	571	570	38.1546	38.6239	27	24.9	26.1	27.6	28.6	26.89	0.28	3.7	78.8	219.6	189
IM0154	12500.1	1	Sri Lanka lowland rain forests	IM	147	187	79.84	81.18	5.94	7.62	1.27211	80.19	6.78	20	30	75	229	354	1	3	1	2	9	17	18	8	7	52	0.45	0.566667	0.24	0.0349345	0.146893	1	1490	1489	305.199	261.99	195	19.3	23.7	26.5	28.4	25.66	0.72	9.1	31.1	252	117.9
IM0155	3065.68	1	Sri Lanka montane rain forests	IM	85	62	80.69	81.22	7.25	7.61	0.729412	80.83	6.98	34	41	76	179	330	6	13	3	2	21	37	20	13	24	91	0.617647	0.902439	0.263158	0.0726257	0.275758	278	2490	2212	1306.52	358.23	1253	15.4	17.9	21.9	24.7	20.67	0.88	9.3	35.8	243.5	99
IM0156	2325.99	1	Sulu Archipelago rain forests	IM	62	34	121.56	121.59	6.4	6.44	0.548387	120	5.2	13	49	18	184	264	1	1	1	2	7	10	10	1	5	28	0.538462	0.204082	0.555556	0.00543478	0.106061	1	754	753	79.7429	92.2635	52	25.3	26.5	26.6	27.3	26.49	0.31	2	92.2	214.1	135.7
IM0157	17994.6	1	Sumatran freshwater swamp forests	IM	129	166	105.32	105.92	4.93	5.23	1.28682	101.54	0.33	0	0	130	391	521	0	0	0	0	0	0	0	0	0	0	#N/A	#N/A	0	0	0	1	127	126	23.6719	20.2234	18	25.9	27.2	26.8	28.1	27.1	0.31	2.2	47.2	211.2	194.5
IM0158	258288	1	Sumatran lowland rain forests	IM	1181	1291	107.03	107.1	5.77	5.91	1.09314	101.05	-0.13	0	0	159	308	467	0	0	0	3	0	0	29	1	3	30	#N/A	#N/A	0.18239	0.00324675	0.0642398	1	1774	1773	169.72	182.952	98	21.2	22.5	27.3	28.9	26.54	0.31	7.7	48.7	189.5	245.4
IM0159	72617.8	1	Sumatran montane rain forests	IM	481	550	102.53	105.16	1.44	5.41	1.14345	100.22	-0.09	0	0	150	391	541	0	0	6	0	0	0	0	9	6	9	#N/A	#N/A	0	0.0230179	0.0166359	84	3633	3549	1133.22	431.959	1086	17.3	18.1	25.5	26.7	23.22	0.29	9.4	63.2	219.2	212
IM0160	87120.5	1	Sumatran peat swamp forests	IM	659	768	103.5	106.09	2.44	3.2	1.1654	102.84	-0.57	0	0	130	463	593	0	0	0	1	0	0	5	0	1	5	#N/A	#N/A	0.0384615	0	0.0084317	1	227	226	14.7872	18.6051	7	25.9	27.1	27.1	27.9	27.1	0.3	2	63	210.1	178.2
IM0161	76205.3	1	Sundaland heath forests	IM	258	295	116.47	117.99	1.85	4.31	1.14341	116.12	0.05	0	0	105	353	458	0	0	0	0	0	0	1	1	0	2	#N/A	#N/A	0.00952381	0.00283286	0.00436681	1	781	780	74.492	50.6858	78	25.1	26	27.6	28.6	26.87	0.27	3.5	59.7	186.6	227.7
IM0162	14524.7	1	Sundarbans freshwater swamp forests	IM	244	176	88.14	90.51	21.88	23.47	0.721311	89.33	22.68	2	24	55	189	270	0	0	0	0	0	2	0	0	0	2	0	0.0833333	0	0	0.00740741	1	22	21	6.89109	3.80607	7	18.5	28.8	20.2	30.7	26.23	3.86	12.2	5.4	293.7	11
IM0163	96929.7	1	Tenasserim-South Thailand semi-evergreen rain forests	IM	334	1097	103.58	103.61	12.75	16.05	3.28443	99.11	11.11	47	148	178	560	933	0	7	1	1	6	18	4	3	9	31	0.12766	0.121622	0.0224719	0.00535714	0.0332262	1	1775	1774	218.9	224.236	132	21.8	25.8	27	29.6	26.32	0.95	7.8	4.7	190.5	54.4
IM0164	25925.7	1	Tonle Sap freshwater swamp forests	IM	214	286	104.77	106.72	12.01	13.62	1.33645	104.9	11.68	6	28	84	299	417	0	1	0	0	0	4	1	0	1	5	0	0.142857	0.0119048	0	0.0119904	1	348	347	6.84126	9.02794	3	24.9	29.2	26.3	30.1	27.61	1.18	5.2	1.4	232.5	27.1
IM0165	29262.5	1	Tonle Sap-Mekong peat swamp forests	IM	158	257	105.07	106.43	12.9	13.49	1.62658	105.1	10.34	5	9	79	301	394	0	0	0	0	0	0	1	0	0	1	0	0	0.0126582	0	0.00253807	1	575	574	9.41427	18.091	4	25	28.9	26.4	29.8	27.58	1.05	4.8	2.2	226.3	38.3
IM0166	262643	1	Upper Gangetic Plains moist deciduous forests	IM	774	658	76.86	84.64	24.71	30.6	0.850129	80.75	27.65	7	25	81	293	406	0	0	0	0	0	6	0	0	0	6	0	0.24	0	0	0.0147783	1	2446	2445	157.395	111.193	141	7.2	21	16.7	35	25.29	6.31	27.8	1.4	228	15.4
IM0167	26170.8	1	Western Java montane rain forests	IM	501	132	106.06	110.61	-7.69	-6.51	0.263473	108.34	-7.1	0	0	63	235	298	0	0	3	3	0	0	30	14	6	44	#N/A	#N/A	0.47619	0.0595745	0.147651	101	3396	3295	771.304	419.198	672	19.1	22.2	25.9	27	24.24	0.41	7.9	25.4	271	224.9
IM0168	41480.9	1	Western Java rain forests	IM	603	237	108.65	110.67	-5.81	-5.8	0.393035	109.41	-6.95	0	0	98	355	453	0	0	0	0	0	0	9	5	0	14	#N/A	#N/A	0.0918367	0.0140845	0.0309051	1	1488	1487	132.15	142.158	96	23.6	24.9	27.4	28.4	26.55	0.34	4.8	17.2	218.1	194.4
IM0169	15488.8	1	Hainan Island monsoon rain forests	IM	164	148	110.08	110.53	20.39	20.71	0.902439	109.65	19.56	35	92	79	362	568	0	0	0	0	8	4	0	2	0	14	0.228571	0.0434783	0	0.00552486	0.0246479	1	1721	1720	316.826	247.877	227	16.4	25.7	19.6	29	23.71	3.58	12.6	11.2	230.1	35.7
IM0170	4063.6	1	Nansei Islands subtropical evergreen forests	IM	70	89	130.86	131.09	30.35	30.84	1.27143	127.98	26.48	27	51	22	138	238	12	15	6	0	17	26	0	8	33	51	0.62963	0.509804	0	0.057971	0.214286	1	1779	1778	193.746	271.418	104	6.8	23.3	17.8	29.2	20.79	5.05	22.4	108.7	272.7	166.4
IM0171	2570.09	1	South Taiwan monsoon rain forests	IM	66	105	120.3	120.94	21.9	22.85	1.59091	120.62	22.38	26	68	41	336	471	0	0	0	0	8	13	0	5	0	26	0.307692	0.191176	0	0.014881	0.0552017	1	2113	2112	320.109	359.031	199	15.3	23.9	18.9	28.2	23.06	3.48	12.9	52.8	432.1	85.5
IM0172	33322.4	1	Taiwan subtropical evergreen forests	IM	198	310	120.05	122	22.5	25.28	1.56566	121.03	23.89	26	72	66	344	508	2	3	1	0	10	18	0	6	6	34	0.384615	0.25	0	0.0174419	0.0669291	1	3743	3742	812.174	846.292	500	3.6	14.8	18.4	28.7	19.07	4.21	25.1	21.4	255.8	101.1
IM0201	239409	2	Central Deccan Plateau dry deciduous forests	IM	732	812	74.48	81.42	14.4	21.7	1.10929	77.95	18.05	9	19	82	298	408	0	1	0	0	0	2	1	0	1	3	0	0.105263	0.0121951	0	0.00735294	1	920	919	360.143	148.896	348	18.8	30.9	24.5	35.5	27.21	3.74	16.7	0	103.2	16.7
IM0202	318937	2	Central Indochina dry forests	IM	735	664	101.76	108.26	17.83	20.45	0.903401	103.4	15.45	19	62	165	491	737	1	1	1	0	1	6	2	2	3	11	0.0526316	0.0967742	0.0121212	0.00407332	0.0149254	1	1325	1324	178.546	127.325	157	18.8	25	26.1	31.9	26.7	2.07	13.1	0.6	188.8	39.5
IM0203	122134	2	Chhota-Nagpur dry deciduous forests	IM	590	442	82	87.8	21.31	25.28	0.749153	84.9	23.29	5	15	77	268	365	0	0	0	0	0	1	0	0	0	1	0	0.0666667	0	0	0.00273973	6	1270	1264	314.841	188.088	289	15.2	28.7	19.9	33.5	25.11	4.99	18.3	2.5	261.7	10.9
IM0204	25432	2	East Deccan dry-evergreen forests	IM	166	524	78.78	80.29	9.51	14.22	3.15663	79.71	11.87	13	29	66	230	338	0	0	0	0	0	3	0	0	0	3	0	0.103448	0	0	0.00887574	1	734	733	34.1649	47.5808	22	23.9	30.5	26.1	33.8	28.51	2.53	9.9	4.1	189.1	23.5
IM0205	34987.1	2	Irrawaddy dry forests	IM	148	277	97.5	97.87	23.57	24.33	1.87162	95.26	20.81	1	7	107	338	453	0	0	1	0	0	3	2	1	1	6	0	0.428571	0.0186916	0.00295858	0.013245	4	1341	1337	161.626	114.538	140	17.6	27.8	23.9	31.7	26.5	2.82	14.1	0.9	152.4	6.9
IM0206	266386	2	Khathiar-Gir dry deciduous forests	IM	636	923	72.37	78.61	20.83	28.41	1.45126	74.51	24.25	4	22	81	299	406	0	0	0	0	0	1	1	0	0	2	0	0.0454545	0.0123457	0	0.00492611	1	1594	1593	346.116	156.79	365	13.9	28.5	22.9	35	25.77	5.21	21.1	0	167.5	10
IM0207	169458	2	Narmada Valley dry deciduous forests	IM	954	1061	73.55	82.96	15.81	25.29	1.11216	73.94	20.55	4	9	78	276	367	0	0	0	0	0	2	0	0	0	2	0	0.222222	0	0	0.00544959	38	1450	1412	402.57	147.321	378	15.6	27.4	22.8	34.9	25.65	4.77	19.3	0	170.2	16.3
IM0208	58154.1	2	Northern dry deciduous forests	IM	453	474	81.42	85.75	17.86	22.12	1.04636	82.87	19.99	2	5	68	261	336	0	0	0	0	0	0	0	0	0	0	0	0	0	0	0	36	1178	1142	298.168	163.015	243	18.2	30	23	34	26.17	4.05	15.8	2	294	12
IM0209	81925.4	2	South Deccan Plateau dry deciduous forests	IM	395	651	75.7	79.35	8.54	14.38	1.6481	77.52	11.46	8	19	76	261	364	0	0	0	0	1	2	2	1	0	6	0.125	0.105263	0.0263158	0.00383142	0.0164835	11	2151	2140	480.068	283.021	423	19.9	24.1	26.4	32.3	26.13	1.86	12.4	0.3	130.2	27.4
IM0210	123784	2	Southeastern Indochina dry evergreen forests	IM	878	645	101.05	109.18	10.46	16.23	0.734624	105.89	13.34	0	0	132	454	586	0	0	0	0	0	0	3	4	0	7	#N/A	#N/A	0.0227273	0.00881057	0.0119454	1	1622	1621	263.125	226.166	172	19.1	24.2	26	30.5	25.92	1.57	11.4	0.6	213.6	32.4
IM0211	34904.9	2	Southern Vietnam lowland dry forests	IM	251	650	109.31	109.46	16.27	16.3	2.58964	109.13	13.3	4	38	93	320	455	0	1	0	0	1	5	2	1	1	9	0.25	0.131579	0.0215054	0.003125	0.0197802	1	1287	1286	214.635	226.634	111	18.6	24.6	25	30.2	25.41	2.06	11.6	12.6	244.8	38.3
IM0212	48212.8	2	Sri Lanka dry-zone dry evergreen forests	IM	241	394	79.7	81.88	5.92	9.46	1.63485	80.79	7.69	19	48	74	270	411	1	9	0	0	4	24	9	4	10	41	0.210526	0.5	0.121622	0.0148148	0.0997567	1	1328	1327	98.4119	97.7462	77	20	22.9	26.4	30.3	27.27	1.1	10.3	7	221.1	134.3
IM0301	76125.4	3	Himalayan subtropical pine forests	IM	512	451	90.54	91	34.14	34.98	0.880859	76.87	31.12	1	2	121	470	594	0	0	0	0	0	0	11	3	0	14	0	0	0.0909091	0.00638298	0.023569	139	4436	4297	1329.15	553.452	1284	-6.5	12.5	14.5	31.4	17.43	6.09	37.9	4.2	75.4	34.9
IM0302	7052.45	3	Luzon tropical pine forests	IM	85	182	120.54	121.34	16.19	17.83	2.14118	120.94	17.01	8	22	40	149	219	0	0	4	0	5	10	23	16	4	54	0.625	0.454545	0.575	0.107383	0.246575	268	2766	2498	1350.98	419.501	1301	16.2	19.3	21.6	25.2	20.43	1.11	9	7.9	385.5	35
IM0303	9685.49	3	Northeast India-Myanmar pine forests	IM	93	206	94.25	95.18	24.8	26.65	2.21505	94.72	25.73	0	0	71	286	357	0	0	0	0	0	0	2	0	0	2	#N/A	#N/A	0.028169	0	0.00560224	146	3441	3295	1387.47	495.397	1359	6.1	17.6	15.4	25.1	17.58	4.01	19	8.5	317.2	14.8
IM0304	2748.02	3	Sumatran tropical pine forests	IM	50	61	101.1	101.41	4.91	5.14	1.22	96.94	4.35	0	0	100	166	266	0	0	0	0	0	0	12	1	0	13	#N/A	#N/A	0.12	0.0060241	0.0488722	323	2779	2456	1430.31	376.669	1451	20	21.6	23.4	26	22.85	0.35	6	74.4	228	121.6
IM0401	82915.8	4	Eastern Himalayan broadleaf forests	IM	696	293	91.22	97.16	26.77	29.1	0.420977	94.19	27.79	10	2	128	490	630	2	0	1	0	2	0	11	5	3	18	0.2	0	0.0859375	0.0102041	0.0285714	46	4552	4506	1592.66	762.02	1551	-2.2	12.9	15.6	28	15.73	4.88	30.2	3.2	85	28.5
IM0402	10708.5	4	Northern Triangle temperate forests	IM	307	176	95.28	98.37	26.53	28.13	0.57329	97.92	27.33	13	21	91	365	490	1	2	0	0	7	6	1	1	3	15	0.538462	0.285714	0.010989	0.00273973	0.0306122	313	3793	3480	1453.23	575.776	1412	3.5	17	13.4	25.8	16.99	4.71	22.3	10.7	180.3	15.2
IM0403	55824.9	4	Western Himalayan broadleaf forests	IM	391	376	83.27	83.99	33.89	34.9	0.961637	75.28	33.21	1	9	76	127	213	0	3	0	0	0	5	1	2	3	8	0	0.555556	0.0131579	0.015748	0.0375587	233	5309	5076	2227.23	920.093	2112	-10.6	9.7	11.4	31.9	11.57	6.66	42.5	6.7	43.9	36.8
IM0501	27435.9	5	Eastern Himalayan subalpine conifer forests	IM	326	164	96.65	97.21	28.68	29.28	0.503067	97	27.85	1	2	89	202	294	0	1	1	1	0	1	5	3	3	9	0	0.5	0.0561798	0.0148515	0.0306122	826	5936	5110	3087.27	680.975	3113	-12.1	5.5	7.7	20	7.67	5.53	32.1	1.8	69	21.7
IM0502	39650.1	5	Western Himalayan subalpine conifer forests	IM	290	212	83.34	83.57	34.45	35.83	0.731034	82	29.17	2	1	58	315	376	0	0	1	0	0	0	9	1	1	10	0	0	0.155172	0.0031746	0.0265957	214	5465	5251	1994.45	1237.71	2237	-9.4	10.9	12.1	33	13.4	7.22	42.4	6.3	32.5	40.3
IM0701	34523.9	7	Terai-Duar savanna and grasslands	IM	560	171	84.45	90.1	27.79	29.32	0.305357	80.78	28.55	2	1	94	366	463	0	0	1	0	0	0	3	2	1	5	0	0	0.0319149	0.00546448	0.0107991	50	1074	1024	158.107	91.1777	144	13.2	25.5	16.6	32	24.1	5.32	18.8	3.2	327.4	22.2
IM0901	27838.7	9	Rann of Kutch seasonal salt marsh	IM	446	236	70.41	71.79	24.2	24.71	0.529148	70.17	23.65	5	6	50	205	266	0	0	0	0	0	3	0	1	0	4	0	0.5	0	0.00487805	0.0150376	1	386	385	6.10761	10.9222	4	17.4	30.7	19.6	33.7	26.9	5.01	16.3	0	89.6	2.3
IM1001	4320.05	10	Kinabalu montane alpine meadows	IM	116	115	115.87	116.92	5.26	6.29	0.991379	116.39	5.77	0	0	113	184	297	0	0	1	0	0	0	25	16	1	41	#N/A	#N/A	0.221239	0.0869565	0.138047	361	4063	3702	1345.62	499.018	1232	15.5	16.4	23	25.3	21.85	0.38	9.8	105.1	215.2	144.6
IM1301	339068	13	Deccan thorn scrub forests	IM	789	1532	79.9	81.15	9.65	21.96	1.9417	77.42	15.08	12	23	96	345	476	0	1	2	0	0	5	4	3	3	12	0	0.217391	0.0416667	0.00869565	0.0252101	1	1477	1476	454.729	232.778	510	18.8	27.4	26.6	34.4	26.75	2.74	15.6	0	35.1	39.7
IM1302	19479.4	13	Indus Valley desert	IM	131	271	70.92	72.3	29.84	32.28	2.0687	71.61	31.06	0	0	36	190	226	0	0	0	0	0	0	0	0	0	0	#N/A	#N/A	0	0	0	100	198	98	153.839	22.2058	159	12	34.3	13.1	35.6	24.65	8.14	23.6	1.6	52.1	5.1
IM1303	487535	13	Northwestern thorn scrub forests	IM	1116	1424	68.57	77.8	23.75	33.48	1.27599	67.98	27.08	10	54	90	405	559	0	2	1	1	0	10	2	1	4	13	0	0.185185	0.0222222	0.00246914	0.0232558	1	3193	3192	163.561	142.356	155	6.7	22.9	21.6	38.3	25.47	6.59	31.6	0	27.5	19.2
IM1304	238254	13	Thar desert	IM	764	655	68.35	76.11	24.16	30.07	0.85733	72.23	27.11	2	12	63	141	218	0	0	0	0	0	2	0	0	0	2	0	0.166667	0	0	0.00917431	1	546	545	161.105	86.4328	153	13.2	32.5	18	35.8	25.92	6.9	22.6	0.1	28.7	5.1
IM1401	6979.78	14	Goadavari-Krishna mangroves	IM	123	180	86.78	87.04	20.39	20.78	1.46341	82.31	16.68	15	17	0	142	174	3	0	0	0	4	4	0	0	3	8	0.266667	0.235294	#N/A	0	0.045977	1	22	21	4.18117	3.58431	3	21.4	30.2	24.8	33.8	28.26	2.95	12.4	2.5	190.6	18.5
IM1402	26762.2	14	Indochina mangroves	IM	204	189	106.89	107.21	20.9	21.07	0.926471	105.65	9.34	1	25	1	299	326	0	2	0	0	0	4	2	0	2	6	0	0.16	2	0	0.0184049	1	430	429	7.83279	21.3067	1	16.3	27.8	26.4	30.5	27.27	1.22	14.2	7.2	140.7	49.5
IM1403	5778.65	14	Indus River Delta-Arabian Sea mangroves	IM	83	136	72.8	72.96	25.55	25.74	1.63855	67.38	24.52	3	11	0	123	137	0	0	0	0	0	1	0	0	0	1	0	0.0909091	#N/A	0	0.00729927	1	131	130	8.66121	8.75761	6	18.5	29.8	23	32.4	26.69	3.63	13.9	0	54.2	4.9
IM1404	21237.9	14	Myanmar Coast mangroves	IM	193	138	100.42	100.69	21.72	21.93	0.715026	95.45	16.32	0	11	1	185	197	0	0	0	0	0	1	1	0	0	2	#N/A	0.0909091	1	0	0.0101523	1	391	390	18.2975	27.0759	12	20.4	27.5	27.2	30.6	26.84	1.29	10.2	1.2	242	181.7
IM1405	37279.8	14	Sunda Shelf mangroves	IM	258	356	119.19	119.26	7.21	7.35	1.37984	109.38	-0.91	0	0	0	267	267	0	0	0	0	0	0	1	0	0	1	#N/A	#N/A	#N/A	0	0.00374532	1	1286	1285	10.0249	33.5744	1	25.7	26.9	27.5	28.7	27.14	0.36	3	58	166.5	275.3
IM1406	20382.9	14	Sundarbans mangroves	IM	205	136	91.4	91.57	23.56	23.58	0.663415	89.81	22.55	3	11	0	174	188	0	0	0	0	0	2	1	0	0	3	0	0.181818	#N/A	0	0.0159574	1	22	21	3.63168	3.41026	2	18.8	28.5	20.5	29.9	26.03	3.5	11.1	6.7	342.7	12.2
Lake	1.03886e+06	98	Lake	NT	979	1161	103.72	109.85	64.78	67.04	1.1859	-86	45.32	0	0	0	0	0	0	0	0	0	0	0	0	0	0	0	#N/A	#N/A	#N/A	#N/A	#N/A	-48	4130	4178	205.082	406.117	156	-29.8	5.7	29.2	33.7	8.87	9.66	63.5	0	5.6	237.6
NA0201	50902.6	2	Sonoran-Sinaloan transition subtropical dry forest	NA	271	581	-110.49	-107.97	29.55	30.27	2.14391	-109.39	27.65	0	0	0	215	215	0	0	0	0	0	0	0	0	0	0	#N/A	#N/A	#N/A	0	0	1	1721	1720	399.613	344.467	377	11	25.5	18.8	31.5	23.03	5.42	20.5	0.7	70.2	7.4
NA0301	39.3851	3	Bermuda subtropical conifer forests	NA	18	14	-64.69	-64.64	32.35	32.38	0.777778	-64.73	32.32	0	1	2	191	194	0	0	0	0	0	1	0	0	0	1	#N/A	1	0	0	0.00515464	1	1	0	1	0	1	0	0	0	0	0	0	0	0	0	0
NA0302	222334	3	Sierra Madre Occidental pine-oak forests	NA	489	888	-102.46	-102.37	32.79	33.1	1.81595	-107	26.89	40	140	0	0	180	1	2	0	0	8	30	0	0	3	38	0.2	0.214286	#N/A	#N/A	0.211111	85	3278	3193	1948.43	497.205	2034	3.5	15.7	20.2	29.9	15.91	4.63	26.4	1.4	62.7	24.7
NA0303	65496.4	3	Sierra Madre Oriental pine-oak forests	NA	205	443	-98.08	-97.94	31.95	32.07	2.16098	-99.58	23.71	39	134	265	331	769	3	2	1	1	13	33	3	136	7	185	0.333333	0.246269	0.0113208	0.410876	0.240572	37	3621	3584	1652.97	550.536	1664	5	14.9	18.4	29.1	18.42	4.5	24.1	3.5	43	31.4
NA0401	84010.8	4	Allegheny Highlands forests	NA	607	232	-81.35	-74.03	40.87	42.98	0.382208	-77.69	41.92	26	28	63	198	315	0	0	0	0	0	1	0	0	0	1	0	0.0357143	0	0	0.0031746	61	1187	1126	464.082	121.242	459	-7.9	18.3	-4	22	7.47	9.49	29.9	39.9	82.3	84.4
NA0402	192264	4	Appalachian mixed mesophytic forests	NA	888	1000	-78.31	-77.62	39.86	41.43	1.12613	-82.67	36.94	55	52	76	200	383	1	0	0	0	5	2	0	0	1	7	0.0909091	0.0384615	0	0	0.0182768	40	1438	1398	386.322	186.29	335	-5.5	18.7	7.2	27.2	11.98	8.59	32.7	50.8	92.2	110.9
NA0403	159343	4	Appalachian-Blue Ridge forests	NA	1110	968	-78.83	-74.01	39.57	41.77	0.872072	-80.3	37.41	65	48	76	194	383	8	0	0	0	19	1	0	0	8	20	0.292308	0.0208333	0	0	0.0522193	30	1981	1951	493.627	282.904	426	-5.1	18.7	5.8	26.5	11.71	8.37	31.6	50.2	88.6	139.3
NA0404	296135	4	Central U.S. hardwood forests	NA	1045	702	-95.12	-83.33	33.77	40.13	0.67177	-86.8	36.95	53	63	72	203	391	0	0	0	0	3	0	0	0	0	3	0.0566038	0	0	0	0.00767263	47	659	612	219.473	85.316	213	-3.9	23.3	4.4	27.8	13.55	9.05	31.7	37.9	105.2	100.7
NA0405	52583.2	4	East Central Texas forests	NA	355	598	-98.76	-95.02	28.09	33.46	1.68451	-96.89	30.77	27	60	57	210	354	0	0	0	0	1	1	0	0	0	2	0.037037	0.0166667	0	0	0.00564972	22	243	221	109.808	33.5944	109	5.2	27.7	11.9	29.6	19.53	7.29	24.4	27.2	87.8	80.9
NA0406	348614	4	Eastern forest-boreal transition	NA	1128	574	-75.96	-69.95	45.98	49.52	0.508865	-77.5	46.27	19	18	61	204	302	0	0	0	0	0	0	0	0	0	0	0	0	0	0	0	1	1568	1567	379.428	127.334	374	-19.1	13.8	-7.6	21.2	2.6	11.67	40.3	38.5	70.1	99.9
NA0407	116673	4	Eastern Great Lakes lowland forests	NA	931	573	-71.13	-69.77	46.88	47.6	0.615467	-75.77	45.09	21	26	62	220	329	0	0	0	0	0	1	0	0	0	1	0	0.0384615	0	0	0.00303951	1	672	671	177.535	121.345	145	-14.2	17.9	-5.5	21.9	6	10.69	36.1	38.1	66.7	89.7
NA0408	39515.7	4	Gulf of St. Lawrence lowland forests	NA	376	267	-61.52	-61.39	47.89	48.02	0.710106	-65.64	46.62	14	6	45	191	256	0	0	0	0	0	0	0	0	0	0	0	0	0	0	0	1	297	296	64.3937	46.8676	55	-11.6	17	-5.7	19.3	5.01	10.05	30.9	57.7	100.3	104.2
NA0409	112240	4	Mississippi lowland forests	NA	319	896	-92.48	-89.01	29.28	37.33	2.80878	-90.74	33.31	34	51	62	222	369	0	0	0	0	0	0	0	0	0	0	0	0	0	0	0	1	208	207	44.915	31.3825	44	-0.3	25.8	11.6	28.1	17.2	8.02	28.4	60.5	118.6	111.5
NA0410	238153	4	New England-Acadian forests	NA	726	794	-59.79	-59.68	48	48.85	1.09366	-67.95	44.57	19	21	61	219	320	0	0	0	0	0	1	0	0	0	1	0	0.047619	0	0	0.003125	1	1873	1872	261.72	173.591	238	-14.6	14.5	-2.6	21.3	4.7	10.18	35.9	48.4	76	124.6
NA0411	89778	4	Northeastern coastal forests	NA	736	698	-68.85	-68.66	44.22	45.24	0.94837	-71.74	42.1	27	34	61	251	373	0	0	0	0	0	0	0	0	0	0	0	0	0	0	0	1	1118	1117	107.952	88.1127	91	-9.7	19.1	0.5	24.7	9.53	9.46	34.4	55.3	81.1	101.5
NA0412	62008.3	4	Ozark Mountain forests	NA	420	238	-96.04	-91.43	34.07	36.21	0.566667	-93.74	35.14	36	56	62	191	345	4	0	0	0	5	0	0	0	4	5	0.138889	0	0	0	0.0144928	60	833	773	258.917	127.983	227	1.3	25.5	4.7	27.8	15.57	8.57	26.5	47.6	130.3	87.5
NA0413	347724	4	Southeastern mixed forests	NA	1441	985	-76.09	-75.96	39.44	39.79	0.683553	-80.73	35.2	62	72	68	212	414	0	0	0	0	4	5	0	0	0	9	0.0645161	0.0694444	0	0	0.0217391	1	991	990	145.574	83.0831	125	-1.3	22.4	9.6	27.7	16.03	7.75	29	50.2	87.4	122.8
NA0414	244828	4	Southern Great Lakes forests	NA	946	682	-82.7	-76.07	41.72	44.45	0.72093	-81.77	41.36	31	33	67	223	354	0	0	0	0	0	1	0	0	0	1	0	0.030303	0	0	0.00282486	75	517	442	251.255	55.2618	249	-8.2	19.6	-0.6	24.9	9.19	9.88	33.1	26.5	69.8	87
NA0415	166477	4	Upper Midwest forest-savanna transition	NA	696	646	-85.62	-84.54	45.57	47.85	0.928161	-90.44	44.97	19	33	60	215	327	0	0	0	0	0	0	0	0	0	0	0	0	0	0	0	175	548	373	311.098	63.5428	304	-16.3	18.9	-6.6	23.1	6.47	11.68	39.4	11.4	75.6	38
NA0416	274721	4	Western Great Lakes forests	NA	957	672	-83.89	-83.27	48.2	50.73	0.702194	-90.27	47.78	19	19	66	216	320	0	0	0	1	0	0	1	0	1	1	0	0	0.0151515	0	0.003125	167	676	509	374.48	83.7993	381	-19.5	16.8	-6.3	21.6	3.63	12.02	41.1	11.2	66	54.6
NA0417	14883	4	Willamette Valley forests	NA	117	267	-123.68	-122.18	43.6	46	2.28205	-122.93	44.8	6	7	53	177	243	0	0	2	0	0	0	0	2	2	2	0	0	0	0.0112994	0.00823045	7	711	704	142.862	96.2421	119	2.8	15.8	5	19.4	10.74	5.25	16.6	11.9	173.1	27.1
NA0501	39932.6	5	Alberta Mountain forests	NA	370	451	-120.6	-115.08	50.53	54.59	1.21892	-117.84	52.56	4	2	62	179	247	0	0	0	0	0	0	0	0	0	0	0	0	0	0	0	871	3548	2677	1915.35	419.232	1893	-13.9	7.7	-8.2	13.3	-0.6	8.41	27.2	26	66.1	71.9
NA0502	121017	5	Alberta-British Columbia foothills forests	NA	480	504	-114.93	-114.24	56.06	58.29	1.05	-118.59	54.4	5	2	59	182	248	0	0	0	0	0	0	0	0	0	0	0	0	0	0	0	443	2297	1854	947.201	235.006	902	-21.5	11.1	-9.5	15.7	0.8	10.63	37.2	11.8	64.4	46.9
NA0503	109052	5	Arizona Mountains forests	NA	574	396	-105.96	-104.43	36.18	36.83	0.689895	-108.92	34.27	11	29	98	208	346	0	0	1	0	1	0	0	3	1	4	0.0909091	0	0	0.0144231	0.0115607	455	3756	3301	1937.01	439.703	1973	-4.9	14	10.3	31.9	10.64	7.48	36.8	5.7	37.9	36.2
NA0504	8975.01	5	Atlantic coastal pine barrens	NA	161	130	-70.02	-69.93	41.53	42.08	0.807453	-74.67	39.63	13	29	44	212	298	0	0	1	0	0	0	0	1	1	1	0	0	0	0.00471698	0.0033557	1	107	106	20.5955	13.9495	17	-2.5	21.1	0.1	24.4	11.26	8.76	26.9	64.4	96.1	90.8
NA0505	64844.2	5	Blue Mountains forests	NA	409	316	-116.86	-116.05	46.02	46.36	0.772616	-118.74	44.94	7	13	82	196	298	0	0	0	0	0	0	0	0	0	0	0	0	0	0	0	345	2915	2570	1339.11	340.245	1341	-8.5	13.1	0.5	22.1	6.26	7.54	30.6	8.1	23.9	23
NA0506	137750	5	British Columbia mainland coastal forests	NA	675	1018	-123.27	-120.87	54.7	56.48	1.50815	-125.98	51.85	12	8	75	221	316	0	0	0	0	0	0	0	0	0	0	0	0	0	0	0	1	3652	3651	882.325	561.782	862	-11.6	8.7	3.8	17.5	4.2	6.08	29.1	16.4	62.1	152
NA0507	46451.4	5	Cascade Mountains leeward forests	NA	455	601	-125.92	-119.45	52	52.45	1.32088	-121.11	49.8	4	3	77	187	271	0	0	0	0	0	0	0	0	0	0	0	0	0	0	0	97	2996	2899	1510.22	492.907	1550	-10.2	8.3	-3.6	20	2.27	7.4	30.2	6.1	30.4	59.7
NA0508	44950.3	5	Central and Southern Cascades forests	NA	172	607	-121.3	-121.04	44.38	47.53	3.52907	-122.14	44.81	19	13	85	202	319	2	0	0	0	5	0	0	0	2	5	0.263158	0	0	0	0.015674	24	4295	4271	1014.3	482.334	977	-5	10.3	3.6	19	7.06	5.71	24	9.8	129.8	61.5
NA0509	72089.9	5	Central British Columbia Mountain forests	NA	567	396	-129.09	-120.07	53.69	57.25	0.698413	-124.58	55.47	4	2	62	174	242	0	0	0	0	0	0	0	0	0	0	0	0	0	0	0	378	3209	2831	1266.08	326.798	1249	-16.4	8.9	-9.4	14.6	0.06	9.36	31	10.5	50.3	53.7
NA0510	73863.3	5	Central Pacific coastal forests	NA	372	700	-123.22	-122.69	50.5	50.87	1.88172	-125.85	49.59	19	11	72	218	320	0	0	2	0	4	0	0	2	2	6	0.210526	0	0	0.00917431	0.01875	1	2088	2087	389	322.151	304	-2	12.4	7.7	18.4	8.56	4.59	20.4	10.1	130.5	99.5
NA0511	132841	5	Colorado Rockies forests	NA	453	850	-109.04	-103.88	35.17	42.83	1.87638	-106.46	39	7	7	81	210	305	0	0	0	0	0	0	0	0	0	0	0	0	0	0	0	1512	4328	2816	2721.05	459.804	2683	-12.7	9.1	0.4	22.1	3.16	8.36	34.8	8.8	26	50.5
NA0512	55298.6	5	Eastern Cascades forests	NA	200	746	-122.49	-120.07	40.63	47.34	3.73	-121.28	43.99	4	12	87	204	307	0	0	0	0	0	0	0	0	0	0	0	0	0	0	0	22	2884	2862	1398.42	357.364	1426	-6.3	13.1	1.5	21.6	6.77	6.95	27.9	6.1	42.5	32.6
NA0513	3879.02	5	Florida sand pine scrub	NA	40	110	-80.26	-80.05	29.64	29.78	2.75	-81.72	29.24	16	51	44	173	284	0	0	0	0	0	4	0	1	0	5	0	0.0784314	0	0.00578035	0.0176056	1	60	59	18.2605	12.6296	16	13.2	27.2	18.7	28	22.2	4.53	14.8	42.9	154.3	67.4
NA0514	137636	5	Fraser Plateau and Basin complex	NA	486	534	-127.73	-120.52	50.99	55.8	1.09877	-124.12	53.39	5	2	67	172	246	0	0	0	0	0	0	0	0	0	0	0	0	0	0	0	204	2694	2490	1036.21	251.865	996	-14.1	9.1	-5.9	16.2	2.13	8.61	30.3	6.5	28.5	78
NA0515	5788.2	5	Great Basin montane forests	NA	58	92	-114.3	-114.11	41.67	41.88	1.58621	-116.24	39.02	4	7	56	160	227	0	0	0	0	0	0	0	3	0	3	0	0	0	0.01875	0.0132159	1257	4267	3010	2476.14	427.091	2446	-6.4	15.1	0.1	24.3	6.29	8.02	30.7	7.8	21.7	33
NA0516	50370	5	Klamath-Siskiyou forests	NA	214	506	-124.24	-121.66	39.17	43.72	2.36449	-122.95	41.44	14	17	82	220	333	0	0	0	0	3	0	0	1	0	4	0.214286	0	0	0.00454545	0.012012	61	4155	4094	939.135	446.353	892	-2.4	13.7	6.4	25.5	9.48	5.61	27.9	3.5	89.8	13.3
NA0517	133597	5	Middle Atlantic coastal forests	NA	588	627	-75.39	-75.04	38.86	39.48	1.06633	-78.47	35.21	47	64	56	237	404	1	0	0	0	2	0	0	0	1	2	0.0425532	0	0	0	0.0049505	1	171	170	25.2038	25.9655	15	-0.5	24.3	10.6	27.8	16.37	7.55	28.3	47.8	100.8	91.5
NA0518	246515	5	North Central Rockies forests	NA	771	965	-122.43	-111.64	45.5	54.11	1.25162	-117.03	49.8	9	10	88	219	326	0	0	0	0	1	0	0	0	0	1	0.111111	0	0	0	0.00306748	292	3889	3597	1486.88	482.006	1493	-13.3	8.3	-1.9	20.4	3.15	8.2	33.7	12.2	43.4	104.7
NA0519	13287.1	5	Northern California coastal forests	NA	131	427	-122.51	-121.68	38.36	42.2	3.25954	-124.07	40.28	17	18	77	232	344	0	0	2	0	4	0	0	3	2	7	0.235294	0	0	0.012931	0.0203488	1	1280	1279	314.642	201.641	292	5.5	13.2	9.4	19.3	11.72	3.49	13.8	1.8	132.8	11.9
NA0520	60754.9	5	Northern Pacific coastal forests	NA	119	186	-130.61	-130.06	61.12	61.32	1.56303	-132.81	55.52	4	1	38	151	194	0	0	0	0	0	0	0	0	0	0	0	0	0	0	0	1	2468	2467	262.576	247.217	186	-11.7	10	2	14.6	4.32	5.7	26.3	29.9	80.3	189
NA0521	25783.1	5	Northern transitional alpine forests	NA	278	287	-127.87	-126.64	54.79	57.38	1.03237	-128.87	56.08	5	1	53	144	203	0	0	0	0	0	0	0	0	0	0	0	0	0	0	0	130	2602	2472	1213.48	359.582	1220	-14	8.3	-8.5	13.2	0.02	8.13	27.2	12.5	56	75.3
NA0522	53495.6	5	Okanagan dry forests	NA	316	491	-121.54	-117.19	47.5	51.93	1.5538	-119.36	49.72	8	14	76	199	297	0	0	0	0	0	0	0	0	0	0	0	0	0	0	0	208	2373	2165	1097.08	370.09	1124	-9.1	12.2	-2.4	20.7	4.57	8.2	29.8	6.5	26.4	71.2
NA0523	140797	5	Piney Woods forests	NA	418	522	-95.93	-91.5	30.03	34.73	1.2488	-93.71	32.38	33	56	61	205	355	0	0	0	0	0	0	0	0	0	0	0	0	0	0	0	1	243	242	72.98	33.6239	73	4.2	27	10.5	28.6	18.11	7.59	24.4	56.8	119.5	113.9
NA0524	22605.5	5	Puget lowland forests	NA	124	382	-122.53	-121.63	50.05	50.3	3.08065	-122.09	47.67	11	8	64	195	278	0	0	0	0	0	0	0	0	0	0	0	0	0	0	0	1	1219	1218	126.029	134.426	93	0.5	15.5	4.8	18.4	9.8	5.14	17.9	19.6	97.7	93.5
NA0525	9998.57	5	Queen Charlotte Islands	NA	106	127	-131.13	-130.94	54.19	54.26	1.19811	-132.07	53.1	1	0	19	143	163	0	0	0	0	0	0	0	0	0	0	0	#N/A	0	0	0	1	1066	1065	204.149	172.809	152	1.3	12.6	4.2	14.3	7.13	4.16	13	54.3	188.2	103.6
NA0526	4001.96	5	Sierra Juarez and San Pedro Martir pine-oak forests	NA	59	100	-115.13	-115.05	31.75	32.64	1.69492	-115.97	32.19	2	28	50	0	80	0	0	0	0	1	9	0	50	0	60	0.5	0.321429	0	#N/A	0.75	426	2910	2484	1584.53	374.879	1528	4.9	17.6	8.5	25.7	13.38	5.86	20.8	0.8	23.8	25.6
NA0527	52871.6	5	Sierra Nevada forests	NA	348	593	-121.95	-117.96	35.61	40.94	1.70402	-119.96	38.27	13	16	84	197	310	2	0	2	0	5	0	0	6	4	11	0.384615	0	0	0.0304569	0.0354839	183	4314	4131	1889.41	715.623	1828	-4.2	12.1	6.5	25.2	8.12	6.68	29.4	1.6	62.6	29.2
NA0528	159693	5	South Central Rockies forests	NA	314	579	-104.92	-103.39	46.64	47.13	1.84395	-109.87	44.53	6	8	87	201	302	0	0	0	0	0	0	0	1	0	1	0	0	0	0.00497512	0.00331126	605	3988	3383	2211.03	480.044	2203	-12.1	12.2	-5.1	22.3	3.6	8.86	34.4	6.3	32.5	48
NA0529	236352	5	Southeastern conifer forests	NA	1027	794	-80.09	-80.03	30.71	33.22	0.773126	-82.33	29.66	50	84	57	236	427	3	5	0	0	4	14	0	2	8	20	0.08	0.166667	0	0.00847458	0.0468384	1	183	182	41.8685	31.9781	35	7.2	26	17.9	28.3	19.87	6.06	21.1	34.9	117.5	119.4
NA0530	41508.5	5	Wasatch and Uinta montane forests	NA	280	567	-111.99	-109.26	37.74	42.63	2.025	-111.49	39.96	7	14	84	190	295	0	0	0	0	0	0	0	0	0	0	0	0	0	0	0	1340	4084	2744	2465.14	440.146	2443	-10.4	11.8	-2.6	22.3	4.25	8.64	32.7	11	22.8	43.3
NA0601	48043.3	6	Alaska Peninsula montane taiga	NA	568	477	-152.31	-152.15	58.05	59.42	0.839789	-153.91	57.22	1	0	34	102	137	0	0	0	0	0	0	0	0	0	0	0	#N/A	0	0	0	1	2511	2510	362.621	322.541	278	-9.5	6.6	-1	12.9	1.94	6.22	22.4	36.7	83.6	93
NA0602	463345	6	Central Canadian Shield forests	NA	1531	947	-85.95	-69.87	48.9	55.01	0.61855	-74.84	51.28	11	2	51	160	224	0	0	0	0	0	0	0	0	0	0	0	0	0	0	0	1	1109	1108	307.583	101.969	304	-24.6	12.5	-12.3	19	-0.74	13.24	43.6	18	73.8	74.8
NA0603	28015.2	6	Cook Inlet taiga	NA	210	304	-150.07	-148.66	61.12	62.98	1.44762	-150.6	61.37	1	0	38	116	155	0	0	0	0	0	0	0	0	0	0	0	#N/A	0	0	0	1	1767	1766	184.288	185.712	119	-15.7	10.2	-7.3	14.7	0.26	9.42	30.4	14.2	63.1	43
NA0604	17275.3	6	Copper Plateau taiga	NA	275	205	-147.38	-142.18	61	62.88	0.745455	-145.8	61.94	1	0	39	116	156	0	0	0	0	0	0	0	0	0	0	0	#N/A	0	0	0	175	1999	1824	663.16	169.738	670	-22.4	11.3	-15	14.2	-2.88	11.99	36.6	3.9	47.5	85.7
NA0605	488587	6	Eastern Canadian forests	NA	1297	778	-52.82	-52.63	54.34	54.57	0.599846	-63.5	50.31	11	1	49	159	220	0	0	1	0	0	0	0	1	1	1	0	0	0	0.00628931	0.00454545	1	1264	1263	337.954	198.225	312	-23.4	10.1	-3.7	18.7	-0.18	10.94	42.1	35.5	71.6	121.6
NA0606	757250	6	Eastern Canadian Shield taiga	NA	1511	896	-55.66	-55.58	58.79	59.49	0.592985	-67.67	55.46	5	1	37	99	142	0	0	0	0	0	0	0	0	0	0	0	0	0	0	0	1	1164	1163	361.435	163.754	335	-25.3	6.7	-11	14.5	-4.82	12.57	39.8	17.5	60.6	83.5
NA0607	446261	6	Interior Alaska-Yukon lowland taiga	NA	1367	1025	-163.1	-135.19	62.07	68.81	0.749817	-149.54	64.27	1	0	43	130	174	0	0	0	0	0	0	0	0	0	0	0	#N/A	0	0	0	1	1371	1370	256.618	166.193	236	-33.7	8	-8.1	16.4	-5.41	13.75	50.1	1.3	27.6	35.3
NA0608	369628	6	Mid-Continental Canadian forests	NA	1312	1005	-97.23	-96.61	53.33	61.48	0.766006	-112.63	56.53	6	3	59	183	251	0	0	0	0	0	0	1	0	0	1	0	0	0.0169492	0	0.00398406	156	1004	848	466.583	170.153	483	-26.4	14.8	-12.5	18.8	-0.4	13.57	45.2	9.7	39.9	24.5
NA0609	548394	6	Midwestern Canadian Shield forests	NA	1397	1111	-111.24	-88.71	49.88	59.35	0.795276	-95.52	54.61	7	3	52	177	239	0	0	0	0	0	0	0	0	0	0	0	0	0	0	0	66	689	623	329.59	102.54	317	-28.3	14.5	-18.4	19.5	-1.81	14.47	47.8	11.3	56.9	35.8
NA0610	263806	6	Muskwa-Slave Lake forests	NA	854	1075	-129.98	-113	57.02	66.48	1.25878	-121.49	61.75	3	0	57	158	218	0	0	0	0	0	0	1	0	0	1	0	#N/A	0.0175439	0	0.00458716	6	1554	1548	416.322	213.357	387	-30.3	12.8	-14	16.9	-3.02	14.71	47.2	11.3	39.6	27.3
NA0611	16390.6	6	Newfoundland Highland forests	NA	152	177	-57.73	-56.18	49.36	50.95	1.16447	-57.01	50.15	0	0	16	116	132	0	0	0	0	0	0	0	0	0	0	#N/A	#N/A	0	0	0	1	798	797	344.594	112.609	313	-11.6	13	-6.3	15.7	2.09	8.61	27.3	65.2	105.3	116.5
NA0612	617319	6	Northern Canadian Shield taiga	NA	1313	1140	-112.38	-94.17	62.87	67.01	0.868241	-106.52	61.81	3	0	48	131	182	0	0	0	0	0	0	0	0	0	0	0	#N/A	0	0	0	2	672	670	323.435	98.1923	315	-32.4	9.1	-23.8	16.7	-7.55	15.73	49.1	5.2	38.3	17.4
NA0613	264234	6	Northern Cordillera forests	NA	879	694	-138.03	-122.81	56.41	62.68	0.789534	-130.42	59.55	6	1	62	165	234	0	0	0	0	0	0	0	0	0	0	0	0	0	0	0	60	2773	2713	1261.3	370.195	1232	-27.1	7.3	-11.1	15.1	-3.17	11.05	42.2	0.4	29.7	81.1
NA0614	348147	6	Northwest Territories taiga	NA	1032	1031	-118	-114.57	68.65	69.01	0.999031	-121.51	64.61	2	0	54	131	187	0	0	0	0	0	0	0	0	0	0	0	#N/A	0	0	0	1	2231	2230	335.621	275.154	274	-30.6	9.1	-21.9	16.7	-7.52	15.98	47.3	6.9	32.9	29.8
NA0615	2035.36	6	South Avalon-Burin oceanic barrens	NA	49	39	-53.67	-53.02	46.85	47.06	0.795918	-53.35	46.78	0	0	15	111	126	0	0	0	0	0	0	0	0	0	0	#N/A	#N/A	0	0	0	1	251	250	66.2055	62.3995	45	-4.6	14.4	-3.5	15.1	4.75	6.66	19.7	89.4	131.3	107.3
NA0616	375339	6	Southern Hudson Bay taiga	NA	1259	1032	-79	-75.65	53.21	59.02	0.819698	-85.74	54.53	7	1	48	160	216	0	0	0	0	0	0	0	0	0	0	0	0	0	0	0	1	377	376	90.2787	56.8667	91	-27.4	11.8	-19	17.4	-3.26	13.88	44.8	11.9	59.9	47
NA0617	62742.2	6	Yukon Interior dry forests	NA	398	530	-138.76	-131.33	58.91	63.7	1.33166	-135.05	61.3	4	0	47	123	174	0	0	0	0	0	0	0	0	0	0	0	#N/A	0	0	0	479	2171	1692	957.444	251.797	914	-29.1	9	-16.7	14.8	-3.64	12.7	43.9	0.2	32.4	51.7
NA0701	80514.6	7	Western Gulf coastal grasslands	NA	761	716	-88.86	-88.81	30.05	30.81	0.940867	-97.77	27.65	28	84	85	339	536	0	0	1	0	1	1	3	2	1	7	0.0357143	0.0119048	0.0352941	0.00589971	0.0130597	1	98	97	12.1416	14.4839	7	9.1	27.2	15.3	29.7	20.94	6.22	20.6	15.5	113.3	109.7
NA0801	55084.3	8	California Central Valley grasslands	NA	327	633	-122.48	-118.76	34.98	40.68	1.93578	-120.62	37.83	6	13	58	184	261	0	0	1	0	0	0	0	4	1	4	0	0	0	0.0217391	0.0153257	-3	1186	1189	88.6413	90.5815	63	6.2	20.6	9	28.8	16.22	6.57	22.6	0.6	27.6	3.8
NA0802	399039	8	Canadian Aspen forests and parklands	NA	1197	775	-100.04	-96.16	54.37	58.99	0.647452	-103.48	51.89	9	9	73	206	297	0	0	0	0	0	0	0	0	0	0	0	0	0	0	0	216	1812	1596	573.108	178.723	579	-23.1	13.1	-8.9	20	1.39	12.61	43.1	9.6	51	51.5
NA0803	282267	8	Central and Southern mixed grasslands	NA	457	1246	-101.76	-96.54	30.76	41.96	2.72648	-99.15	36.36	17	67	86	228	398	0	0	0	0	0	2	0	1	0	3	0	0.0298507	0	0.00438596	0.00753769	243	1074	831	565.245	157.982	545	-7.6	23.1	6.9	29.3	13.43	9.87	36.9	8.6	58.6	33.5
NA0804	407235	8	Central forest-grasslands transition	NA	1157	1313	-86.39	-86.21	40.96	42.8	1.13483	-95.42	36.99	42	77	89	234	442	0	0	0	0	1	1	0	0	0	2	0.0238095	0.012987	0	0	0.00452489	91	671	580	246.972	72.1746	235	-8.7	21.7	7.1	29.6	12.98	9.84	38.3	21.4	77.2	70.4
NA0805	248867	8	Central tall grasslands	NA	618	790	-97.8	-90.14	39.13	46.2	1.27832	-93.97	42.67	18	39	72	228	357	0	0	0	0	0	0	0	0	0	0	0	0	0	0	0	160	639	479	366.292	80.3124	356	-14	21.5	-2.4	26.2	8.24	11.73	40.2	9.1	87	32.3
NA0806	61733.7	8	Edwards Plateau savanna	NA	341	322	-101.01	-97.44	29.04	31.94	0.944282	-99.22	30.49	15	62	57	191	325	1	0	0	1	1	3	1	0	2	5	0.0666667	0.0483871	0.0175439	0	0.0153846	137	762	625	494.836	149.476	489	5.9	27.2	11.5	30.3	18.89	7.39	24.4	17.1	68.1	49.5
NA0807	29632.1	8	Flint Hills tall grasslands	NA	127	369	-97.19	-95.72	36.47	39.78	2.90551	-96.46	38.13	14	42	60	199	315	0	0	0	0	0	0	0	0	0	0	0	0	0	0	0	225	505	280	380.848	50.6188	385	-3.5	25.7	1.3	28.3	13.1	10.16	31.8	18.2	112.5	32.4
NA0808	81929	8	Montana Valley and Foothill grasslands	NA	366	818	-108.8	-106.95	45.1	51.73	2.23497	-112.57	48.05	8	10	80	214	312	0	0	0	0	0	0	0	0	0	0	0	0	0	0	0	792	2912	2120	1405.32	337.998	1342	-13.3	15	-4.7	22.4	5.37	9.05	35.7	5.6	37.4	40.1
NA0809	61212.4	8	Nebraska Sand Hills mixed grasslands	NA	427	278	-103.25	-98.08	40.69	43.18	0.651054	-100.66	41.93	8	21	59	160	248	0	0	0	0	0	0	0	0	0	0	0	0	0	0	0	555	1335	780	940.394	172.435	937	-7.1	22.3	-4	24.2	8.64	10.46	31.3	7.9	74.7	12.5
NA0810	219614	8	Northern mixed grasslands	NA	1218	1265	-110.92	-96.99	49.33	52.66	1.03859	-98.27	47.23	13	18	87	222	340	0	0	0	0	0	0	0	0	0	0	0	0	0	0	0	307	1463	1156	590.049	184.879	541	-18.1	16.2	-5.9	24.2	4.15	12.35	42.3	5.1	52.8	24.4
NA0811	640109	8	Northern short grasslands	NA	1110	1130	-112.65	-98.24	41.94	52.04	1.01802	-105.45	46.99	8	19	89	231	347	0	0	0	1	0	0	1	0	1	1	0	0	0.011236	0	0.00288184	375	2743	2368	865.207	262.253	796	-17.8	17	-3	24.3	5.91	11.2	42.1	5.1	38.2	23.7
NA0812	76259.4	8	Northern tall grasslands	NA	354	678	-100.4	-95.42	45.65	51.72	1.91525	-97.17	48.69	12	13	66	212	303	0	0	0	0	0	0	0	0	0	0	0	0	0	0	0	214	428	214	282.115	36.1145	274	-19.9	18.4	-13.4	22.1	3.38	13.42	42	10	71.2	23.6
NA0813	46992.6	8	Palouse grasslands	NA	400	465	-121.07	-115.97	44.8	49.01	1.1625	-117.62	46.9	8	14	72	199	293	0	0	0	0	0	0	0	1	0	1	0	0	0	0.00502513	0.00341297	109	1950	1841	712.851	275.354	710	-6.6	16.1	1.4	23.6	8.55	7.87	30.2	5.2	28.6	25.2
NA0814	50214.8	8	Texas blackland prairies	NA	345	508	-97.73	-95.15	29.24	33.81	1.47246	-96.97	31.39	30	69	63	216	378	0	0	0	0	3	2	0	0	0	5	0.1	0.0289855	0	0	0.0132275	43	322	279	154.305	43.723	152	4.8	27.6	10.8	29.8	18.9	7.79	25	33.5	89.7	70.1
NA0815	435313	8	Western short grasslands	NA	604	1387	-105.3	-98.51	30.82	43.29	2.29636	-101.9	37.06	17	59	90	245	411	0	0	0	1	0	1	1	1	1	3	0	0.0169492	0.0111111	0.00408163	0.00729927	402	2609	2207	1198.47	346.414	1180	-6.1	17.9	7.1	29	12.38	9.01	35.1	4.8	33.2	20.7
NA1101	152718	11	Alaska-St. Elias Range tundra	NA	1012	572	-146.37	-136.82	62.7	64.22	0.565217	-141.12	61.71	2	0	45	153	200	0	0	0	0	0	0	0	0	0	0	0	#N/A	0	0	0	1	5149	5148	1197.2	588.91	1098	-26.5	0.3	-7.1	14.5	-4.94	10.92	41	0.1	53.4	102.9
NA1102	12141	11	Aleutian Islands tundra	NA	109	86	179.49	179.78	57.11	57.25	0.788991	-167.03	53.63	0	0	16	85	101	0	0	3	0	0	0	2	3	3	5	#N/A	#N/A	0.125	0.0352941	0.049505	1	2164	2163	255.112	248.295	184	-5	7.5	0	11.7	3.42	4.05	16.7	31.3	80.8	78.6
NA1103	98909.4	11	Arctic coastal tundra	NA	678	281	-124.37	-122.58	74.08	74.23	0.414454	-154.27	70.41	0	0	23	74	97	0	0	0	0	0	0	0	0	0	0	#N/A	#N/A	0	0	0	1	403	402	50.585	63.9997	30	-32.2	4.3	-24.4	13.5	-11.34	14.03	45.7	0.6	22.1	10.6
NA1104	130032	11	Arctic foothills tundra	NA	1219	483	-162.5	-135.72	68.37	70.18	0.396226	-164.63	68.58	0	0	32	64	96	0	0	0	0	0	0	0	0	0	0	#N/A	#N/A	0	0	0	1	1220	1219	228.79	155.885	193	-29.5	4.6	-20.8	12.5	-10.04	13.42	42	3.1	25.5	11.6
NA1105	9171.51	11	Baffin coastal tundra	NA	84	78	-67.64	-66.66	71.07	71.57	0.928571	-69.34	70.31	0	0	9	28	37	0	0	0	0	0	0	0	0	0	0	#N/A	#N/A	0	0	0	1	1164	1163	226.1	184.787	180	-30.6	2.3	-24.9	5.8	-12.81	12.44	36.4	0.7	26.3	14.6
NA1106	151820	11	Beringia lowland tundra	NA	376	498	-160.25	-154.23	66.59	67.08	1.32447	-163.67	60.87	1	0	39	111	151	0	0	0	0	0	0	2	1	0	3	0	#N/A	0.0512821	0.00900901	0.0198675	1	1382	1381	52.8091	86.3354	16	-24.3	7.8	-2.4	13.6	-1.33	9.54	37.9	8.1	54	49.5
NA1107	97952.5	11	Beringia upland tundra	NA	410	331	-160.21	-157.51	66.03	66.36	0.807317	-163.62	65.38	1	0	39	107	147	0	0	0	0	0	0	2	1	0	3	0	#N/A	0.0512821	0.00934579	0.0204082	1	1585	1584	233.236	206.61	183	-22.6	6.6	-10.2	13.6	-3.66	10.62	36.2	9	63.6	28.8
NA1108	160646	11	Brooks-British Range tundra	NA	1237	367	-163.87	-135	65.85	69.7	0.296686	-149.43	67.77	0	0	38	52	90	0	0	0	0	0	0	0	0	0	0	#N/A	#N/A	0	0	0	48	2621	2573	880.52	374.941	830	-33.2	0.2	-22.4	15	-11.59	13.99	48.2	0.1	25.6	16.8
NA1109	88523	11	Davis Highlands tundra	NA	357	363	-61.55	-61.27	72.81	73.73	1.01681	-65.46	67.19	0	0	9	35	44	0	0	0	0	0	0	0	0	0	0	#N/A	#N/A	0	0	0	1	2117	2116	715.376	416.067	682	-39	-1.9	-21.8	6.3	-14.71	12.55	45.3	0.3	23.9	43.9
NA1110	467509	11	High Arctic tundra	NA	757	779	-65.2	-61.13	82.89	83.12	1.02906	-75.87	70.16	0	0	10	44	54	0	0	0	0	0	0	1	0	0	1	#N/A	#N/A	0.1	0	0.0185185	1	1778	1777	301.208	246.976	267	-43.8	-2.9	-26.4	7.1	-18.31	14.8	50.9	0.1	9.1	34.7
NA1111	234132	11	Interior Yukon-Alaska alpine tundra	NA	907	673	-142.17	-130.04	67.47	68.73	0.742007	-145.89	64.46	1	0	50	121	172	0	0	0	0	0	0	0	0	0	0	0	#N/A	0	0	0	51	2745	2694	830.49	309.825	804	-30.6	6.7	-16.4	15.4	-6.24	14.18	46	0.1	26.8	36.5
NA1112	306129	11	Kalaallit Nunaat high arctic tundra	NA	788	1271	-17.4	-12.16	83.29	83.62	1.61294	-29.82	81.6	0	0	9	0	9	0	0	0	0	0	0	0	0	0	0	#N/A	#N/A	0	#N/A	0	1	3940	3939	515.864	503.976	411	-38.4	-9.3	-12.4	4.7	-16.92	11.91	43.1	0.1	0.1	47.5
NA1113	172182	11	Kalaallit Nunaat low arctic tundra	NA	291	535	-32.27	-32	74.7	74.74	1.83849	-50.15	63.5	0	0	4	0	4	0	0	0	0	0	0	0	0	0	0	#N/A	#N/A	0	#N/A	0	1	2669	2668	576.841	449.396	490	-29.9	-5.7	-3.4	9.7	-6.37	7.82	39.6	3.8	25.6	117.3
NA1114	801765	11	Low Arctic tundra	NA	1754	1466	-78.48	-69.1	68.62	69.83	0.835804	-100.95	62.75	0	0	34	71	105	0	0	0	0	0	0	0	0	0	0	#N/A	#N/A	0	0	0	1	864	863	221.65	154.646	182	-35.6	5.5	-22.1	12.5	-11.34	14.96	48.1	1.7	25.9	26.6
NA1115	1.04024e+06	11	Middle Arctic tundra	NA	984	1235	-63.07	-62.99	74.3	74.56	1.25508	-94.31	67.38	0	0	21	55	76	0	0	0	0	0	0	0	0	0	0	#N/A	#N/A	0	0	0	1	1320	1319	173.86	136.056	152	-35.8	2.2	-19.3	10.9	-13.95	14.26	46.7	0.5	17.7	30.6
NA1116	209808	11	Ogilvie-MacKenzie alpine tundra	NA	838	773	-143.28	-125.41	60.68	67.29	0.922434	-129.54	63.99	0	0	46	112	158	0	0	0	0	0	0	0	0	0	0	#N/A	#N/A	0	0	0	220	2939	2719	1242.33	416.973	1236	-33.4	8	-22.4	15	-8.12	14.49	48.4	0.2	34	34.3
NA1117	107362	11	Pacific Coastal Mountain icefields and tundra	NA	777	329	-129.75	-129.04	61.21	61.96	0.423423	-142.1	60.49	5	1	49	162	217	0	0	0	0	0	0	0	0	0	0	0	0	0	0	0	1	5800	5799	999.357	634.43	946	-22	-0.6	-0.1	14.3	-0.65	7.88	36.3	21.6	57.6	171.8
NA1118	32463	11	Torngat Mountain tundra	NA	211	354	-62.23	-61.88	60.29	60.48	1.67773	-63.71	58.83	0	0	17	41	58	0	0	0	0	0	0	0	0	0	0	#N/A	#N/A	0	0	0	1	1524	1523	495.939	251.373	535	-24.1	4.9	-19.2	8.7	-7.42	10.69	32.8	12.8	58.7	47.8
NA1201	36249.4	12	California coastal sage and chaparral	NA	376	410	-115.36	-115.15	34.01	34.5	1.09043	-116.63	32.67	20	66	77	294	457	0	2	2	1	6	18	1	5	5	30	0.3	0.272727	0.012987	0.0170068	0.0656455	1	2524	2523	579.54	438.013	480	5.3	16.9	14.9	26	15.74	4.66	20.7	0.7	27	14.7
NA1202	64627.4	12	California interior chaparral and woodlands	NA	416	713	-121.83	-118.6	38.03	40.83	1.71394	-120.17	37.64	15	31	74	231	351	1	0	2	0	5	1	0	5	3	11	0.333333	0.0322581	0	0.021645	0.031339	1	2236	2235	435.314	288.663	396	2.5	16.4	11.1	28.5	14.06	5.42	26	0.7	32.6	7.1
NA1203	20406.5	12	California montane chaparral and woodlands	NA	328	240	-120.11	-116.54	35.53	36.64	0.731707	-119.33	34.75	14	30	65	222	331	1	0	1	0	4	0	0	2	2	6	0.285714	0	0	0.00900901	0.0181269	1	3379	3378	1104.13	552.148	1077	2.3	16.1	10.2	26.5	12.93	5.75	24.2	1.3	46.4	14.4
NA1301	77590.5	13	Baja California desert	NA	569	855	-111.67	-110.89	27.9	31.71	1.50264	-113.79	27.86	8	63	60	0	131	1	1	3	0	3	27	0	60	5	90	0.375	0.428571	0	#N/A	0.687023	1	1908	1907	321.748	295.755	240	7.1	19.8	18.1	29.1	19.87	4.17	22	0.2	10.2	17.2
NA1302	59194.9	13	Central Mexican matorral	NA	576	432	-99.97	-98.21	19.12	23.01	0.75	-100.98	21.06	41	128	96	0	265	0	0	0	0	10	19	0	96	0	125	0.243902	0.148438	0	#N/A	0.471698	980	3200	2220	2074.98	239.659	2068	9.6	14.1	15.4	24.5	16.96	2.62	14.9	3.9	60.1	10.7
NA1303	508892	13	Chihuahuan desert	NA	1093	1131	-105.37	-100.35	31.72	34.36	1.03477	-105.99	29.27	33	191	161	332	717	0	7	0	1	3	51	2	4	8	60	0.0909091	0.267016	0.0124224	0.0120482	0.083682	215	2621	2406	1271.05	317.398	1287	0.4	20	13.6	31.7	17.66	6.82	31.3	1.3	28.8	40.3
NA1304	326501	13	Colorado Plateau shrublands	NA	896	819	-114.2	-104.31	33.5	40.91	0.914062	-109.26	37.21	12	55	128	222	417	0	1	0	0	0	2	0	0	1	2	0	0.0363636	0	0	0.00479616	516	3749	3233	1848.82	323.987	1828	-12.5	14.2	6.7	31	9.66	8.82	43.5	2.8	15.5	44.3
NA1305	336212	13	Great Basin shrub steppe	NA	761	797	-120.34	-111.23	36.39	43.49	1.04731	-115.79	39.94	9	27	103	204	343	0	0	0	0	0	0	0	2	0	2	0	0	0	0.00980392	0.0058309	335	4047	3712	1719.22	357.056	1705	-10	14.8	5.7	31.1	8.59	8.59	41.1	2.5	7.1	43
NA1306	23536.7	13	Gulf of California xeric scrub	NA	421	718	-110.72	-110.28	29.95	29.99	1.70546	-112.01	26.75	2	82	62	0	146	0	12	6	0	0	39	0	62	18	101	0	0.47561	0	#N/A	0.691781	1	1584	1583	298.379	235.285	248	12.5	24.3	18.3	30.6	21.38	4.63	18.1	0.1	10.1	9.4
NA1307	124975	13	Meseta Central matorral	NA	585	485	-99.26	-98.26	23.26	25.65	0.82906	-101.77	22.83	25	101	105	0	231	0	0	1	0	4	15	0	105	1	124	0.16	0.148515	0	#N/A	0.536797	458	3174	2716	1800.84	337.494	1881	9.6	17.7	18	27.8	18.15	3.62	18.2	2.2	32.4	31.2
NA1308	130647	13	Mojave desert	NA	502	500	-118.65	-113.1	33.69	38.18	0.996016	-115.88	35.93	8	40	84	230	362	0	1	1	0	1	2	0	1	2	4	0.125	0.05	0	0.00434783	0.0110497	-79	3505	3584	975.259	439.357	917	-0.1	21.5	11.5	37.8	17.08	8.56	37.9	0.6	5.4	11.6
NA1309	218533	13	Snake-Columbia shrub steppe	NA	846	578	-121.42	-110.96	44.98	47.83	0.683215	-116.25	42.7	8	21	101	207	337	0	0	0	0	0	0	0	2	0	2	0	0	0	0.00966184	0.00593472	22	3536	3514	1252.79	506.419	1374	-9.1	14.5	1.5	23.9	7.75	8.2	33	3.3	17.7	36.4
NA1310	222843	13	Sonoran desert	NA	650	825	-109.58	-109.42	29.72	35.03	1.26923	-113.09	31.3	29	129	154	246	558	0	5	1	0	5	41	0	7	6	53	0.172414	0.317829	0	0.0284553	0.0949821	-75	2039	2114	416.379	306.057	379	4.9	23.7	18.4	34.6	21.3	7.08	29.7	0.2	6.3	18.1
NA1311	16236.8	13	Tamaulipan matorral	NA	167	252	-98.33	-98.17	26.81	27.06	1.50898	-99.77	25.09	17	68	80	0	165	0	0	1	0	3	7	0	80	1	90	0.176471	0.102941	0	#N/A	0.545455	17	2149	2132	432.036	227.628	398	12.2	24.3	17.1	30.3	22.39	5.4	18.1	6.1	68.9	21
NA1312	141231	13	Tamaulipan mezquital	NA	457	652	-100.5	-97.35	26.14	29.77	1.4267	-99.67	26.83	28	100	100	342	570	1	1	0	1	3	16	3	1	3	23	0.107143	0.16	0.03	0.00292398	0.0403509	1	1359	1358	204.124	138.578	176	8.8	27.4	16.9	31.3	22.26	6.45	22.5	7.2	62.5	30.7
NA1313	132577	13	Wyoming Basin shrub steppe	NA	503	566	-106.58	-105.49	40.42	45.27	1.12525	-108.54	42.72	5	7	82	189	283	0	0	0	0	0	0	0	0	0	0	0	0	0	0	0	1097	3298	2201	1980.02	298.197	2046	-11.1	13.1	-4.2	23	5.27	9.6	34.1	2.7	26.7	39.6
NT0101	215673	1	Araucaria moist forests	NT	630	686	-52.68	-48.16	-27.56	-23.57	1.08889	-51.31	-26.65	45	68	131	482	726	0	0	1	1	0	0	18	131	2	149	0	0	0.137405	0.271784	0.205234	78	1795	1717	801.852	214.181	835	10.1	18.1	16.5	25.1	17.58	3.2	15	44.4	120.1	167.4
NT0102	7850.29	1	Atlantic Coast restingas	NT	159	267	-35.57	-35.04	-6.25	-5.13	1.67925	-50.19	-30.05	0	0	116	257	373	0	0	1	2	0	0	5	116	3	121	#N/A	#N/A	0.0431034	0.451362	0.324397	1	109	108	6.71354	9.31133	3	12.2	22.8	24.9	27.7	21.25	2.64	15.5	8.2	90	134.8
NT0103	109305	1	Bahia coastal forests	NT	447	1000	-38.63	-37.6	-12.75	-11.86	2.23714	-39.7	-16.45	0	0	136	466	602	0	0	2	4	0	0	30	136	6	166	#N/A	#N/A	0.220588	0.291845	0.275748	1	1972	1971	260.176	251.449	159	15.7	21.4	23.4	27.6	23.61	1.57	11.9	15.4	81.2	148.8
NT0104	229241	1	Bahia interior forests	NT	793	1165	-38.36	-37.56	-11.8	-11.51	1.4691	-41.85	-16.9	0	0	149	540	689	0	0	1	2	0	0	39	149	3	188	#N/A	#N/A	0.261745	0.275926	0.272859	1	1951	1950	605.007	286.055	610	14.2	20.5	22.2	27.1	21.88	1.9	12.9	1.6	63.5	97.1
NT0105	90229.2	1	Bolivian Yungas	NT	652	516	-69.47	-63.38	-18.01	-13.38	0.791411	-66.43	-15.69	57	43	165	539	804	0	8	3	5	6	12	30	165	16	213	0.105263	0.27907	0.181818	0.306122	0.264925	173	5133	4960	1421.51	909.713	1048	6.1	11.2	23.5	27.7	20.81	1.59	21.6	2.6	109.8	89.8
NT0106	4776.27	1	Caatinga Enclaves moist forests	NT	61	161	-39.04	-38.67	-3.77	-3.24	2.63934	-40.89	-3.96	0	0	0	0	0	0	0	0	0	0	0	0	0	0	0	#N/A	#N/A	#N/A	#N/A	#N/A	35	1040	1005	525.155	232.66	577	22.2	24.7	25.1	27.5	25.19	0.88	5.3	1	214.7	21.5
NT0107	183358	1	Caqueta moist forests	NT	685	492	-75.07	-68.91	1.94	2.85	0.718248	-72.04	0.64	63	130	189	469	851	0	1	0	1	4	10	2	189	2	205	0.0634921	0.0769231	0.010582	0.402985	0.240893	64	1541	1477	229.247	119.694	208	20.1	23.9	25.3	27.4	25.77	0.63	7.3	38.7	254.1	223.9
NT0108	22752.8	1	Catatumbo moist forests	NT	257	235	-70.85	-70.41	10.04	10.77	0.914397	-72.66	8.8	3	62	175	403	643	0	2	0	1	0	7	3	175	3	185	0	0.112903	0.0171429	0.434243	0.287714	1	1870	1869	228.274	263.105	129	22.1	24.3	27.5	28.6	26.65	0.5	6.5	11.3	127.9	122.2
NT0109	31915.3	1	Cauca Valley montane forests	NT	199	642	-76.91	-75.11	1.95	7.73	3.22613	-76.01	4.84	60	96	149	493	798	12	2	0	0	39	34	21	149	14	243	0.65	0.354167	0.14094	0.302231	0.304511	142	4655	4513	1886.61	706.073	1829	7.4	8.8	24.7	26.2	18.36	0.21	18.8	31.6	154.6	300.4
NT0110	94.8325	1	Cayos Miskitos-San AndrΘs and Providencia moist forests	NT	8	12	-81.4	-81.35	14.35	14.41	1.5	-81.7	12.54	0	13	0	29	42	0	2	0	0	0	5	0	0	2	5	#N/A	0.384615	#N/A	0	0.119048	3	28	25	8.25	7.80625	6	0	0	0	0	0	0	0	0	0	0
NT0111	89449.9	1	Central American Atlantic moist forests	NT	717	440	-83.63	-83.16	16.41	16.51	0.613668	-84.67	14.05	38	144	164	429	775	0	0	1	3	1	2	3	164	4	170	0.0263158	0.0138889	0.0182927	0.382284	0.219355	1	2119	2118	294.738	302.85	187	18.3	22.4	25.5	29	25.04	1.08	10.7	13.9	156.3	139.5
NT0112	13251.1	1	Central American montane forests	NT	125	61	-85.11	-85	15.59	15.68	0.488	-89.61	15.18	73	112	177	303	665	0	0	0	1	14	11	17	177	1	219	0.191781	0.0982143	0.0960452	0.584158	0.329323	20	4189	4169	1631.89	665.429	1525	9.3	15.1	22.2	25.8	20.1	1.34	16.5	0	161.3	110.1
NT0113	5758.94	1	Chiapas montane forests	NT	132	72	-91.24	-91.18	16.96	17.37	0.545455	-92.8	17.09	49	64	154	325	592	0	1	0	0	12	10	13	154	1	189	0.244898	0.15625	0.0844156	0.473846	0.319257	162	2808	2646	1287.22	412.754	1284	15.3	18.4	21.6	26.9	20.89	1.54	11.6	19.5	271.2	101.5
NT0114	2076.66	1	Chimalapas montane forests	NT	75	65	-94.54	-93.84	16.36	16.94	0.866667	-94.19	16.65	19	31	141	294	485	1	2	0	1	5	6	6	141	4	158	0.263158	0.193548	0.0425532	0.479592	0.325773	180	2227	2047	1070.91	328.049	1045	18.3	23.1	20.7	25.8	22.26	1.7	7.5	0.3	199.1	10.3
NT0115	73305.1	1	Choc≤-DariΘn moist forests	NT	320	903	-78.2	-76.19	8.44	9.57	2.82187	-76.97	5.51	145	206	209	600	1160	17	14	3	5	56	63	46	209	39	374	0.386207	0.305825	0.220096	0.348333	0.322414	1	1893	1892	147.031	151.641	107	22.1	23.2	26.5	28	25.98	0.3	5.9	31.8	232.6	522.3
NT0116	24.7648	1	Cocos Island moist forests	NT	7	6	-87.09	-87.03	5.5	5.56	0.857143	-87.06	5.53	1	0	0	8	9	0	0	0	0	0	0	3	0	0	3	0	#N/A	#N/A	0	0.333333							0	0	0	0	0	0	0	0	0	0
NT0117	14281.6	1	Cordillera La Costa montane forests	NT	120	41	-62.13	-61.94	10.63	10.76	0.341667	-66.22	9.99	38	54	173	584	849	17	6	1	4	26	14	23	173	28	236	0.684211	0.259259	0.132948	0.296233	0.277974	1	2682	2681	750.87	451.55	668	16.3	18.9	25.4	28	23.07	0.66	11.7	9.9	108	53.1
NT0118	67577.1	1	Cordillera Oriental montane forests	NT	474	1099	-76.07	-71.81	1.31	11.2	2.31857	-72.12	6.26	88	73	228	658	1047	15	6	0	10	57	28	41	228	31	354	0.647727	0.383562	0.179825	0.346505	0.338109	103	4209	4106	1485.31	823.387	1340	9	10.3	26	28.3	19.78	0.3	19.3	0.6	98.2	122.8
NT0119	10653.5	1	Costa Rican seasonal moist forests	NT	201	181	-85.24	-83.77	12.07	12.17	0.900498	-84.96	10.43	41	99	182	373	695	0	0	0	0	4	3	6	182	0	195	0.097561	0.030303	0.032967	0.487936	0.280576	1	3341	3340	583.097	538.258	402	16.1	17.7	26.6	28.8	24.76	0.73	12.7	0	237.3	94.4
NT0120	21339.3	1	Cuban moist forests	NT	199	87	-75.4	-74.2	22.98	23.11	0.437186	-75.44	20.42	0	0	37	251	288	0	0	0	1	0	0	9	37	1	46	#N/A	#N/A	0.243243	0.14741	0.159722	1	1731	1730	244.861	242.613	163	19.2	23.5	23.7	28.5	24.71	1.8	9.3	20.6	111	75.7
NT0121	102062	1	Eastern Cordillera real montane forests	NT	494	894	-80.48	-76.04	-6.06	1.97	1.80972	-78.26	-2.04	201	154	161	568	1084	54	5	3	7	123	41	36	161	69	361	0.61194	0.266234	0.223602	0.283451	0.333026	194	5072	4878	1736.33	880.918	1582	7.2	8.9	23.3	25.8	18.2	0.38	18.6	0	48.3	298
NT0122	3031.21	1	Eastern Panamanian montane forests	NT	57	81	-77.63	-77.12	9.4	9.51	1.42105	-77.38	8.34	30	102	186	327	645	0	1	0	5	6	9	17	186	6	218	0.2	0.0882353	0.0913978	0.568807	0.337984	46	1828	1782	628.115	282.857	610	22.8	24.2	24.9	26.2	24.4	0.53	3.4	51.8	267.1	113.5
NT0123	18.8245	1	Fernando de Noronha-Atol das Rocas moist forests	NT	10	5	-32.48	-32.39	-3.88	-3.83	0.5	-32.44	-3.86	0	0	0	9	9	0	0	0	1	0	0	2	0	1	2	#N/A	#N/A	#N/A	0	0.222222	1	77	76	13.6	21.4602	1	0	0	0	0	0	0	0	0	0	0
NT0124	145958	1	Guianan Highlands moist forests	NT	953	762	-53.1	-53	7.91	7.99	0.79958	-63.22	4	69	15	209	613	906	8	5	0	0	24	8	7	209	13	248	0.347826	0.533333	0.0334928	0.340946	0.273731	114	2973	2859	884.422	373.749	772	16.2	17.8	25.6	26.9	22.96	0.39	10.7	12.4	172.1	231.3
NT0125	476136	1	Guianan moist forests	NT	1333	842	-57.51	-50.97	7.03	8.66	0.631658	-56.99	4.89	124	195	228	685	1232	15	6	1	0	33	14	4	228	22	279	0.266129	0.0717949	0.0175439	0.332847	0.226461	1	1190	1189	173.772	121.181	153	23.2	25.1	26.9	28.3	26.05	0.54	5.1	18.1	153.4	181.5
NT0126	9880.95	1	Gurupa varzeß	NT	206	104	-53.7	-52.22	-2.01	-1.54	0.504854	-53.74	-2	0	0	148	558	706	0	0	0	0	0	0	1	148	0	149	#N/A	#N/A	0.00675676	0.265233	0.211048	1	100	99	24.8442	19.2312	21	25.8	27.3	26.4	28.2	26.89	0.63	2.4	36.1	290.8	58.9
NT0127	45813.5	1	Hispaniolan moist forests	NT	519	194	-68.64	-68.32	19.67	19.95	0.373796	-70.09	19.09	0	0	25	217	242	0	0	0	5	0	0	32	25	5	57	#N/A	#N/A	1.28	0.115207	0.235537	1	2178	2177	290.384	266.607	212	17	21.9	24.6	28.1	24.61	1.3	11.1	0.5	100.7	137.1
NT0128	114506	1	Iquitos varzeß	NT	421	415	-67.79	-66.77	-0.89	-0.67	0.985748	-74.28	-5.35	105	142	227	624	1098	1	1	0	1	2	3	5	227	3	237	0.0190476	0.0211268	0.0220264	0.363782	0.215847	84	1200	1116	163.021	61.5992	154	22.9	24.8	26.3	27.8	26.29	0.52	4.9	24.4	206.9	252
NT0129	58358.9	1	Isthmian-Atlantic moist forests	NT	860	511	-82.07	-77.65	9.36	12.54	0.594186	-83.65	10.22	120	168	184	518	990	2	2	0	3	25	18	14	184	7	241	0.208333	0.107143	0.076087	0.355212	0.243434	1	2499	2498	183.021	208.116	114	17.4	19.5	26.3	28.6	25.63	0.71	11.2	10.9	187.8	212.2
NT0130	29176	1	Isthmian-Pacific moist forests	NT	527	294	-81.83	-79.88	8.16	9.84	0.557875	-82.28	8.52	99	143	187	407	836	1	4	2	2	18	18	10	187	9	233	0.181818	0.125874	0.0534759	0.459459	0.278708	1	2379	2378	326.052	328.324	219	15	18	25.7	28.2	24.71	0.65	13.2	0	290.9	88.3
NT0131	8269.56	1	Jamaican moist forests	NT	219	64	-78.31	-76.24	17.89	18.47	0.292237	-77.28	18.18	0	0	25	207	232	0	0	0	2	0	0	29	25	2	54	#N/A	#N/A	1.16	0.120773	0.232759	1	2110	2109	376.808	269.912	340	21.4	24.4	27.7	30.3	24.89	1.05	8.9	49.1	201.9	102.3
NT0132	268444	1	Japurß-Solimoes-Negro moist forests	NT	1236	747	-62.34	-59.65	-1.56	2.93	0.604369	-65.21	-0.54	39	47	181	506	773	1	0	0	1	4	1	8	181	2	194	0.102564	0.0212766	0.0441989	0.357708	0.25097	20	565	545	80.026	58.5893	48	24.3	25.6	27.1	28.4	26.39	0.37	4.1	51.2	269.4	236.4
NT0133	241493	1	Juruß-Purus moist forests	NT	674	559	-62.98	-62.81	-4.09	-2.68	0.829377	-66.22	-5.88	0	0	171	554	725	0	0	0	0	0	0	1	171	0	172	#N/A	#N/A	0.00584795	0.308664	0.237241	36	219	183	81.5642	20.7378	84	23.5	25.8	26.5	27.4	26.11	0.4	3.9	31.2	245.3	157
NT0134	986.45	1	Leeward Islands moist forests	NT	25	47	-61.78	-61.55	18.4	18.45	1.88	-61.67	16.16	0	0	18	134	152	0	0	1	0	0	0	4	18	1	22	#N/A	#N/A	0.222222	0.134328	0.144737	1	1264	1263	254.793	274.427	150	21.8	24.7	23.9	27	24.36	1.13	5.2	108.4	297.8	152.6
NT0135	716682	1	Madeira-Tapaj≤s moist forests	NT	1234	1582	-55.63	-54.39	-11.46	-1.79	1.28201	-60.03	-8.9	0	0	183	621	804	0	0	0	2	0	0	6	183	2	189	#N/A	#N/A	0.0327869	0.294686	0.235075	8	1074	1066	165.542	91.5982	164	21.4	25.7	27.1	29.1	26.23	0.68	7.7	1.1	168.6	86.4
NT0136	104598	1	Magdalena Valley montane forests	NT	465	866	-76.6	-72.4	1.49	9.28	1.86237	-74.5	5.38	107	80	176	500	863	21	6	0	1	59	23	26	176	28	284	0.551402	0.2875	0.147727	0.352	0.329085	44	4924	4880	1654.53	894.551	1572	7.6	8.8	27.1	28.1	19.31	0.2	20.5	15.8	103.3	172.2
NT0137	76439.9	1	Magdalena-Urabß moist forests	NT	404	530	-76.94	-73.27	5.36	10.13	1.31188	-75.1	7.75	47	122	177	517	863	2	0	0	0	6	13	12	177	2	208	0.12766	0.106557	0.0677966	0.34236	0.24102	1	842	841	90.6638	72.5526	77	24	24.5	28.1	29.6	27.54	0.37	5.6	9.8	135.3	111.8
NT0138	88305	1	Maraj≤ varzeß	NT	479	250	-48.58	-48.36	2.13	4.34	0.521921	-50.51	-1.12	1	20	99	540	660	0	0	1	0	0	0	1	99	1	100	0	0	0.010101	0.183333	0.151515	1	407	406	7.62788	23.8121	1	24.5	26.1	26.7	28.5	26.88	0.53	4	6	320	84.9
NT0139	141635	1	Maranhπo Babaτu forests	NT	678	394	-44.38	-40.85	-2.64	-2.45	0.581121	-43.91	-4.26	0	0	112	268	380	0	0	0	0	0	0	1	112	0	113	#N/A	#N/A	0.00892857	0.41791	0.297368	1	917	916	116.065	101.902	98	22.7	25.2	26.9	29.4	26.98	0.74	6.7	1.9	180.9	37.6
NT0140	412314	1	Mato Grosso seasonal forests	NT	924	798	-47.44	-47.24	-5.6	-5.2	0.863636	-52.68	-10.02	0	0	140	476	616	0	0	0	2	0	0	3	140	2	143	#N/A	#N/A	0.0214286	0.294118	0.232143	45	775	730	302.056	91.5455	300	22.3	24.7	26.7	28.6	25.51	0.65	6.3	0.8	227.1	31.4
NT0141	66506.1	1	Monte Alegre varzeß	NT	414	370	-55.97	-54.71	-1.11	-0.05	0.89372	-61.65	-6	0	0	200	681	881	0	0	0	2	0	0	4	200	2	204	#N/A	#N/A	0.02	0.293686	0.231555	4	412	408	48.194	40.758	38	24.9	26.7	27.1	28.9	26.82	0.46	4	16.6	208.3	141.7
NT0142	250591	1	Napo moist forests	NT	600	792	-78.43	-73.02	-5.08	2.04	1.32	-75.73	-1.52	181	218	219	649	1267	20	5	0	3	33	21	9	219	28	282	0.18232	0.0963303	0.0410959	0.337442	0.222573	105	1161	1056	243.176	116.582	201	21.1	22.3	25.9	27.5	25.68	0.59	6.4	93.8	196.6	296.1
NT0143	200932	1	Negro-Branco moist forests	NT	1225	673	-72.83	-61.81	-1.13	4.92	0.549388	-66.26	1.89	53	120	194	486	853	5	3	0	2	8	7	7	194	10	216	0.150943	0.0583333	0.0360825	0.399177	0.253224	25	2015	1990	146.715	89.6144	120	22.5	23.8	27	29.4	26.56	0.59	6.9	34.4	300	214.8
NT0144	10010.9	1	Northeastern Brazil restingas	NT	219	94	-41.32	-39.67	-3.02	-2.33	0.429224	-42.98	-2.75	0	0	105	276	381	0	0	0	0	0	0	2	105	0	107	#N/A	#N/A	0.0190476	0.380435	0.28084	1	109	108	26.2031	23.2362	22	26.1	27.7	26.6	28.2	27.1	0.57	2.1	0.8	283	15.3
NT0145	80806.1	1	Northwestern Andean montane forests	NT	468	1297	-79.76	-75.54	-3.32	8.34	2.77137	-77.11	2.51	227	146	166	567	1106	71	13	1	12	147	69	57	166	97	439	0.647577	0.472603	0.343373	0.292769	0.396926	98	4848	4750	1645.2	956.399	1523	8.5	9.6	25.9	26.5	18.91	0.19	18	0	82.8	475.6
NT0146	7576.92	1	Oaxacan montane forests	NT	152	219	-95.53	-95.22	18.9	19.96	1.44079	-96.74	17.82	51	92	119	323	585	1	3	1	0	18	17	3	119	5	157	0.352941	0.184783	0.0252101	0.368421	0.268376	217	3300	3083	1467.84	481.674	1450	11.8	17.4	20.2	25.5	18.17	1.85	13.7	18.1	181.8	102.8
NT0147	28028.2	1	Orinoco Delta swamp forests	NT	433	325	-61.45	-59.13	10.78	10.81	0.750577	-61.1	9.06	10	23	178	405	616	0	1	1	0	0	3	0	178	2	181	0	0.130435	0	0.439506	0.293831	1	751	750	11.3151	28.35	1	24.9	26.7	26.1	27.8	26.57	0.58	2.9	33.8	195.2	115
NT0148	17152.9	1	Pantanos de Centla	NT	251	140	-93.48	-91.09	17.54	18.79	0.557769	-92.28	18.16	18	45	120	360	543	0	0	0	0	0	6	0	120	0	126	0	0.133333	0	0.333333	0.232044	1	300	299	13.8701	18.0056	8	22.6	28.1	24.4	30	26.88	2.05	7.4	27.4	254.2	78.8
NT0149	7690.31	1	Guianan freshwater swamp forests	NT	345	56	-57.13	-54.02	5.47	5.97	0.162319	-55.58	5.72	33	70	106	565	774	0	0	0	0	0	1	0	106	0	107	0	0.0142857	0	0.187611	0.138243	1	41	40	9.39614	8.15071	7	25.7	27.5	26.4	28.1	26.98	0.6	2.4	47.4	242.7	86.6
NT0150	482879	1	Alto Paranß Atlantic forests	NT	968	1192	-41.76	-41.01	-15.71	-14.97	1.2314	-52.62	-23.25	60	86	194	564	904	0	0	0	0	0	0	16	194	0	210	0	0	0.0824742	0.343972	0.232301	1	2703	2702	424.495	230.626	365	9.5	16.9	23.7	28.1	21.66	2.78	18.6	6.9	108.2	160.6
NT0151	17501.7	1	Pernambuco coastal forests	NT	172	302	-35.82	-34.94	-7.12	-6.62	1.75581	-35.72	-8.73	0	0	107	407	514	0	0	0	5	0	0	17	107	5	124	#N/A	#N/A	0.158879	0.262899	0.241245	1	663	662	173.381	135.28	150	20.7	24.3	23.6	27	24.25	1.21	6.3	7.7	95.2	54
NT0152	22597.1	1	Pernambuco interior forests	NT	170	193	-35.33	-34.79	-6.29	-5.8	1.13529	-36.34	-8.79	0	0	106	343	449	0	0	0	0	0	0	8	106	0	114	#N/A	#N/A	0.0754717	0.309038	0.253898	1	926	925	250.354	242.258	148	19	23.3	24	27.8	24.39	1.39	8.8	3.9	79.7	62.5
NT0153	185961	1	Peruvian Yungas	NT	807	688	-75.41	-69.38	-8.8	-4.99	0.85254	-73.49	-11.89	104	72	164	645	985	41	12	4	17	71	35	81	164	74	351	0.682692	0.486111	0.493902	0.254264	0.356345	212	5622	5410	2557.5	1182.69	2691	1.1	3	24.7	26.1	14.91	0.77	25	0.7	66.8	228.5
NT0154	148595	1	PetΘn-Veracruz moist forests	NT	941	463	-88.36	-88.23	17.65	19.13	0.49203	-90.33	17.1	111	257	186	468	1022	6	9	2	0	40	54	1	186	17	281	0.36036	0.210117	0.00537634	0.397436	0.274951	1	2444	2443	255.408	299.036	155	15.8	20.1	24.4	29.8	24.94	1.94	14	6.7	177.4	170.8
NT0155	7504.11	1	Puerto Rican moist forests	NT	173	63	-65.56	-65.42	18.08	18.52	0.364162	-66.34	18.24	1	0	21	181	203	0	0	0	2	0	0	16	20	2	36	0	#N/A	0.761905	0.110497	0.17734	1	1210	1209	265.207	228.553	200	20.4	24	23.5	27	24.06	1.3	6.6	62.6	176	118.5
NT0156	176760	1	Purus varzeß	NT	1130	615	-63.61	-62.59	1.64	1.89	0.544248	-69.45	-3.99	84	141	199	623	1047	0	0	0	0	1	4	2	199	0	206	0.0119048	0.0283688	0.0100503	0.319422	0.196753	36	929	893	85.8625	44.4131	78	23.2	25.5	26.5	27.5	26.1	0.41	4.3	28.4	178	267.2
NT0157	173261	1	Purus-Madeira moist forests	NT	920	738	-60.37	-59.19	-3.62	-3.27	0.802174	-63.36	-6.58	0	0	165	572	737	0	0	0	0	0	0	0	165	0	165	#N/A	#N/A	0	0.288462	0.223881	15	529	514	87.8343	41.881	95	24.4	26.4	26.8	28.2	26.46	0.49	3.8	18.8	254.8	73.4
NT0158	95986.1	1	Rio Negro campinarana	NT	228	218	-60.89	-60.61	4.62	5.05	0.95614	-68.78	0.81	13	0	153	358	524	0	0	0	0	0	0	6	153	0	159	0	#N/A	0.0392157	0.427374	0.303435	36	1840	1804	136.336	177.391	92	20.2	21.9	26.4	28.7	26.35	0.5	8.5	48.4	313	240.2
NT0159	4765.53	1	Santa Marta montane forests	NT	114	110	-74.15	-73.11	10.25	11.24	0.964912	-73.89	10.74	20	38	156	459	673	5	6	1	6	15	12	24	156	18	207	0.75	0.315789	0.153846	0.339869	0.307578	275	3838	3563	1738.65	644.311	1621	7.5	15.3	21.8	23.9	18.9	0.82	16.4	17.3	264	36.8
NT0160	104610	1	Serra do Mar coastal forests	NT	893	911	-42.01	-41.56	-22.22	-21.58	1.02016	-48.74	-25.75	0	0	151	628	779	0	0	2	7	0	0	57	151	9	208	#N/A	#N/A	0.377483	0.240446	0.267009	1	2276	2275	503.134	374.88	518	9.5	17.2	21.2	26.8	19.59	2.68	17.3	17.7	101.6	145
NT0161	3890.16	1	Sierra de los Tuxtlas	NT	100	83	-95.41	-94.46	17.97	18.71	0.83	-94.94	18.34	41	83	115	436	675	5	4	0	0	14	17	2	115	9	148	0.341463	0.204819	0.0173913	0.263761	0.219259	1	1600	1599	312.435	303.195	218	19	25.6	22	28.9	24.1	2.38	9.9	23.7	340.6	32.9
NT0162	11217.9	1	Sierra Madre de Chiapas moist forests	NT	434	274	-93.8	-89.77	13.92	16.38	0.631336	-92.28	15.15	46	131	145	315	637	5	0	0	0	14	25	7	145	5	191	0.304348	0.19084	0.0482759	0.460317	0.299843	3	3832	3829	629.454	552.686	461	15.3	19.6	26.1	28.4	23.99	0.91	13.1	0	222.8	41.5
NT0163	166931	1	Solim⌡es-Japurß moist forests	NT	969	456	-69.41	-65.95	-1.48	-0.22	0.470588	-70.32	-2.28	122	203	189	542	1056	1	1	0	0	6	11	2	189	2	208	0.0491803	0.0541872	0.010582	0.348708	0.19697	55	583	528	103.272	25.4959	100	24.2	25.9	25.8	27.4	26.22	0.5	3.2	126.7	261	250.6
NT0164	2070.85	1	South Florida rocklands	NT	48	64	-80.23	-80.15	25.88	26.22	1.33333	-80.39	25.66	15	52	29	176	272	0	1	0	0	0	3	0	0	1	3	0	0.0576923	0	0	0.0110294	1	4	3	2.00498	0.736527	2	17.8	27.4	19.8	28.2	23.65	3.44	10.4	37.1	220.2	52.1
NT0165	75150	1	Southern Andean Yungas	NT	231	496	-64.03	-63.42	-18.83	-18.04	2.14719	-64.96	-23.59	41	41	120	343	545	4	3	1	5	10	4	18	120	13	152	0.243902	0.097561	0.15	0.349854	0.278899	250	4787	4537	1375.81	750.694	1221	2.5	13.3	17.8	27.3	18.56	3.79	24.8	0.7	81.7	16.9
NT0166	746653	1	Southwest Amazon moist forests	NT	1348	1575	-64.97	-62.92	-7.45	-3.42	1.1684	-69.17	-10.48	147	227	257	782	1413	10	24	2	8	12	50	17	257	44	336	0.0816327	0.220264	0.0661479	0.328645	0.237792	59	5648	5589	249.601	240.438	200	6.1	14.4	26.2	28.6	25.49	0.79	22.5	3.8	119.1	216.1
NT0167	16274.4	1	Talamancan montane forests	NT	429	172	-80.11	-80.04	10.88	10.99	0.400932	-82.77	9.11	130	132	204	450	916	24	9	7	25	59	32	60	204	65	355	0.453846	0.242424	0.294118	0.453333	0.387555	65	3688	3623	1428.07	651.26	1308	13.9	15.5	24	26.4	19.71	0.54	12.5	4.7	295.8	196.1
NT0168	335099	1	Tapaj≤s-Xingu moist forests	NT	729	969	-58.2	-51.61	-10.52	-1.8	1.32922	-54.9	-6.16	0	0	161	556	717	0	0	0	1	0	0	2	161	1	163	#N/A	#N/A	0.0124224	0.289568	0.227336	4	619	615	204.77	117.012	194	23.5	24.9	26.4	28.2	25.75	0.44	4.7	0.8	269.9	89.7
NT0169	50675.2	1	Pantepui	NT	177	234	-56.59	-56.37	7.29	7.33	1.32203	-65.46	5.63	40	23	186	628	877	18	3	1	14	26	9	41	186	36	262	0.65	0.391304	0.22043	0.296178	0.298746	160	2949	2789	1390.9	467.727	1328	15.9	16.8	23.9	25.7	20.4	0.42	9.8	14.8	304	228.2
NT0170	192766	1	Tocantins/Pindare moist forests	NT	582	516	-44.67	-44.49	-2.94	-0.72	0.886598	-47.11	-3.04	0	0	149	517	666	0	0	1	0	0	0	0	149	1	149	#N/A	#N/A	0	0.288201	0.223724	1	392	391	90.573	71.9373	81	25	26.3	26.9	28.1	26.71	0.36	3.1	3.9	253.5	101.2
NT0171	4721.99	1	Trinidad and Tobago moist forests	NT	106	88	-60.84	-60.53	11.13	11.32	0.830189	-61.21	10.69	0	0	83	308	391	0	0	0	1	0	0	2	83	1	85	#N/A	#N/A	0.0240964	0.269481	0.217391	1	887	886	92.6747	100.547	64	23.9	25.9	25.3	27	25.97	0.64	3.1	40.2	203.3	64.5
NT0172	9.2554	1	Trindade-Martin Vaz Islands tropical forests	NT	4	4	-29.85	-29.84	-20.5	-20.48	1	-30.32	-20.5	0	0	0	0	0	0	0	0	0	0	0	0	0	0	0	#N/A	#N/A	#N/A	#N/A	#N/A							0	0	0	0	0	0	0	0	0	0
NT0173	470048	1	Uatuma-Trombetas moist forests	NT	1310	775	-54.65	-50.89	-2.22	3.28	0.591603	-56.78	-0.2	51	113	175	482	821	0	0	0	0	0	0	0	175	0	175	0	0	0	0.363071	0.213155	1	605	604	167.739	98.4586	162	24.3	26.3	27.3	28.9	26.62	0.58	4.6	25.6	205.2	144.6
NT0174	114443	1	Ucayali moist forests	NT	427	629	-75.79	-73.84	-4.97	-3.86	1.47307	-76.19	-7.38	110	129	188	603	1030	5	4	1	0	14	7	2	188	10	211	0.127273	0.0542636	0.0106383	0.311774	0.204854	134	4520	4386	499.995	312.677	417	16.6	18.6	26.2	27.7	25.09	0.48	11.1	33.8	123.1	158.6
NT0175	29268.9	1	Venezuelan Andes montane forests	NT	357	274	-72.46	-69.21	7.56	10.03	0.767507	-70.41	8.8	50	35	202	473	760	24	2	1	3	34	9	21	202	30	266	0.68	0.257143	0.10396	0.427061	0.35	121	4020	3899	1341.82	747.928	1247	7.7	9.1	26.2	28.1	20.71	0.4	20.4	6.3	83.5	71.4
NT0176	68946.4	1	Veracruz moist forests	NT	378	605	-97.43	-96.39	21.72	24.51	1.60053	-98.21	21.79	60	146	119	341	666	2	2	2	1	18	25	3	119	7	165	0.3	0.171233	0.0252101	0.348974	0.247748	1	2206	2205	235.906	268.821	139	15.6	21.8	20	30.9	23.92	3.7	15.3	4.8	99.2	95.3
NT0177	4942.45	1	Veracruz montane forests	NT	176	163	-99.12	-97.43	19.91	21.37	0.926136	-98.39	20.64	27	48	98	328	501	1	0	1	0	9	5	3	98	2	115	0.333333	0.104167	0.0306122	0.29878	0.229541	207	2657	2450	1221.1	422.48	1207	12.3	19.3	16.9	25.9	19.31	2.69	13.6	18.9	263.9	82.3
NT0178	33954.3	1	Western Ecuador moist forests	NT	278	497	-80.77	-78.26	-2.77	1.7	1.78777	-79.52	-0.53	96	160	127	490	873	6	9	0	1	41	45	49	127	16	262	0.427083	0.28125	0.385827	0.259184	0.300115	1	1214	1213	182.349	128.994	157	20.5	21.8	25.4	27.4	24.68	0.63	6.9	0.1	137.4	183.8
NT0179	2013.65	1	Windward Islands moist forests	NT	40	46	-61.05	-60.85	15.23	15.59	1.15	-61.03	14.66	0	0	13	158	171	0	0	0	8	0	0	23	13	8	36	#N/A	#N/A	1.76923	0.0822785	0.210526	1	1104	1103	171.377	179.194	126	23.3	26	24.7	27.2	25.48	0.95	3.9	61.6	270.4	111.8
NT0180	265072	1	Xingu-Tocantins-Araguaia moist forests	NT	582	1023	-49.9	-47.67	-6.89	-1.18	1.75773	-50.3	-5.78	0	0	153	527	680	0	0	0	1	0	0	1	153	1	154	#N/A	#N/A	0.00653595	0.290323	0.226471	1	875	874	192.396	130.487	198	23.3	24.6	26.7	28.1	26.04	0.39	4.8	2.8	275.9	97.8
NT0181	69482	1	Yucatßn moist forests	NT	477	420	-87.02	-86.73	20.26	21.56	0.880503	-89.02	19.67	35	148	116	359	658	0	2	0	2	2	22	4	116	4	144	0.0571429	0.148649	0.0344828	0.32312	0.218845	1	360	359	81.2474	77.8354	50	20.6	26.9	23.9	29	25.62	2.05	8.4	15.9	183.2	39.9
NT0182	229836	1	Guianan piedmont and lowland moist forests	NT	797	866	-60.63	-60.1	6.38	7.69	1.08657	-63.97	3.79	0	0	0	0	0	0	0	0	0	0	0	0	0	0	0	#N/A	#N/A	#N/A	#N/A	#N/A	1	2720	2719	537.602	377.838	452	17.4	19.2	27	29.1	24.74	0.42	11.7	9.2	179.8	198.7
NT0201	68245.5	2	Apure-Villavicencio dry forests	NT	515	512	-73.04	-68.37	4.69	9.24	0.994175	-71.48	6.94	48	67	156	474	745	2	0	0	0	5	4	0	156	2	165	0.104167	0.0597015	0	0.329114	0.221477	43	1818	1775	199.609	136.878	148	20.3	22.8	26.2	29.3	26.61	0.64	9	1.6	146.7	83.4
NT0202	114660	2	Atlantic dry forests	NT	300	887	-41.52	-40.12	-8.5	-7.21	2.95667	-43.44	-12.95	0	0	107	311	418	0	0	0	2	0	0	6	107	2	113	#N/A	#N/A	0.0560748	0.344051	0.270335	175	1477	1302	547.223	144.479	539	18.4	22.4	26.4	29.6	24.53	1.03	11.2	0.7	88.8	34.3
NT0204	37383.7	2	Bajφo dry forests	NT	386	194	-104.05	-100.34	19.63	21.38	0.502591	-102.2	20.51	33	70	124	278	505	0	0	0	0	7	4	0	124	0	135	0.212121	0.0571429	0	0.446043	0.267327	1230	2802	1572	1782.11	196.597	1787	12.8	19.6	17.9	25.1	18.8	2.55	12.3	2.7	108.6	7.6
NT0205	62246.6	2	Balsas dry forests	NT	610	277	-97.4	-96.8	19.73	19.85	0.454098	-100.01	18.44	43	142	138	264	587	0	6	0	1	11	41	9	138	7	199	0.255814	0.288732	0.0652174	0.522727	0.339012	72	2800	2728	946.003	460.27	921	13.9	18.4	26.2	32.3	24.39	1.73	18.4	0.8	114.8	27.7
NT0206	72779.6	2	Bolivian montane dry forests	NT	334	342	-66.1	-63.53	-14.69	-14.19	1.02395	-66.29	-18.11	24	29	129	222	404	0	6	0	1	0	6	9	129	7	144	0	0.206897	0.0697674	0.581081	0.356436	529	5107	4578	2590.27	782.117	2649	3.5	10.6	19.4	25.8	15.41	2.13	22.3	0.6	56.3	59.3
NT0207	7312.8	2	Cauca Valley dry forests	NT	144	477	-76.66	-75.36	3	7.29	3.3125	-75.69	5.15	7	35	107	311	460	0	0	0	0	1	2	1	107	0	111	0.142857	0.0571429	0.00934579	0.344051	0.241304	333	1878	1545	826.031	201.975	834	20.2	21	24.6	25.8	23.42	0.35	5.6	48.5	148.2	141.3
NT0209	67773.1	2	Central American dry forests	NT	645	508	-74.86	-74.83	15.13	15.75	0.787597	-86.48	12.04	36	100	183	330	649	0	0	0	1	0	1	6	183	1	190	0	0.01	0.0327869	0.554545	0.292758	1	1658	1657	244.489	249.991	141	19.3	23.5	27.6	30.4	25.8	0.9	11.1	0	151.7	91.1
NT0210	786790	7	Dry Chaco	NT	972	1822	-67.72	-57.99	-33.87	-17.54	1.87449	-62.86	-25.7	50	125	140	357	672	0	9	1	0	0	17	2	140	10	159	0	0.136	0.0142857	0.392157	0.236607	45	3433	3388	315.755	288.795	215	5.7	18.9	22	29.3	22.19	4.15	23.6	1.3	56.9	47.4
NT0211	13973.6	2	Chiapas Depression dry forests	NT	252	186	-94.06	-91.7	15.45	17.12	0.738095	-92.88	16.28	33	111	148	188	480	0	2	1	0	5	19	3	148	3	175	0.151515	0.171171	0.0202703	0.787234	0.364583	178	3510	3332	754.289	298.046	684	17.7	21.3	22.6	26.9	23.31	1.41	9.2	0	185.1	89.3
NT0212	229767	2	Chiquitano dry forests	NT	804	781	-61.15	-56.67	-12.59	-12.18	0.971393	-61.98	-15.94	29	35	141	457	662	0	0	0	0	0	1	2	141	0	144	0	0.0285714	0.0141844	0.308534	0.217523	50	1131	1081	301.213	109.603	281	19.9	25.1	23.9	28.8	25.43	1.77	8.9	6.7	123.5	68.8
NT0213	65744.6	2	Cuban dry forests	NT	969	375	-75.07	-74.5	22.43	23.17	0.386997	-77.9	21.51	0	0	36	246	282	0	0	0	0	0	0	5	36	0	41	#N/A	#N/A	0.138889	0.146341	0.14539	1	1045	1044	66.815	73.3831	47	20.5	25.8	23.7	28.5	25.22	1.95	8	15.8	120.7	73.6
NT0214	21187.1	2	Ecuadorian dry forests	NT	149	253	-79.62	-79.26	0.41	0.45	1.69799	-80.14	-1.3	13	31	76	338	458	0	0	0	0	3	4	37	76	0	120	0.230769	0.129032	0.486842	0.224852	0.262009	1	853	852	200.796	122.469	163	21.2	23.6	24.4	26.8	24.34	0.9	5.6	0.3	64.3	29.9
NT0215	15445.9	2	Hispaniolan dry forests	NT	356	261	-71.55	-70.06	19.99	20.09	0.733146	-71.12	18.77	0	0	27	214	241	0	0	0	0	0	0	23	27	0	50	#N/A	#N/A	0.851852	0.126168	0.207469	1	1568	1567	209.517	227.696	135	18.3	21.3	25.8	29	25.33	1.31	10.7	0.8	87	97.7
NT0216	213.396	2	Islas Revillagigedo dry forests	NT	17	17	-110.84	-110.79	19.27	19.34	1	-110.99	18.79	0	5	0	34	39	0	2	0	1	0	4	4	0	3	8	#N/A	0.8	#N/A	0	0.205128	1	53	52	1.28108	3.81277	1	0	26.2	0	26.2	21.68	7.05	26.2	0	0	0
NT0217	26050.2	2	Jalisco dry forests	NT	375	417	-105.7	-102.13	21.74	21.82	1.112	-103.92	19.8	26	121	138	326	611	0	1	1	0	7	23	6	138	2	174	0.269231	0.190083	0.0434783	0.423313	0.284779	1	2223	2222	535.041	454.096	404	15.5	22.1	25.7	29.5	24.44	1.81	14	1.7	148.9	11.6
NT0218	2309.51	2	Jamaican dry forests	NT	101	38	-76.32	-76.18	18.43	18.53	0.376238	-77.35	17.87	0	0	27	200	227	0	0	0	0	0	0	24	27	0	51	#N/A	#N/A	0.888889	0.135	0.22467	1	852	851	187.315	210.69	104	23.8	26.8	26.3	29	26.47	1.02	5.2	18.5	197.5	54.4
NT0219	16869.9	2	Lara-Falc≤n dry forests	NT	203	163	-70.16	-68.3	10.07	11.53	0.802956	-69.23	10.8	10	9	140	334	493	0	1	0	0	2	3	5	140	1	150	0.2	0.333333	0.0357143	0.419162	0.30426	1	1472	1471	329.943	290.741	235	22.6	24.1	26.9	29.3	26.02	0.76	6.7	9.6	72.7	27.3
NT0220	907.006	2	Lesser Antillean dry forests	NT	31	41	-60.55	-60.52	18.23	18.26	1.32258	-61.4	10.61	0	0	13	132	145	0	0	0	0	0	0	1	13	0	14	#N/A	#N/A	0.0769231	0.0984848	0.0965517	1	467	466	76.6879	83.7116	52	24.6	26.7	25.2	27.8	26.22	0.83	3.2	34.6	139.6	76.4
NT0221	19548.7	2	Magdalena Valley dry forests	NT	185	378	-75.97	-74.3	1.99	5.4	2.04324	-75.14	3.7	19	51	113	348	531	0	0	0	0	0	6	3	113	0	122	0	0.117647	0.0265487	0.324713	0.229755	131	2006	1875	611.815	266.547	598	19.2	22.1	27.4	29.5	25.71	0.4	10.3	23.7	143.7	103
NT0222	30084.6	2	Maracaibo dry forests	NT	302	297	-72.79	-70.04	8.47	11.14	0.983444	-72.46	9.81	9	12	151	397	569	2	0	0	0	4	0	6	151	2	161	0.444444	0	0.0397351	0.380353	0.282953	1	1304	1303	211.422	234.629	111	22.9	25	27.9	29.5	27.33	0.52	6.6	2.3	107.8	91
NT0223	11322.3	2	Mara±≤n dry forests	NT	214	362	-79.33	-77.4	-8.34	-5.08	1.69159	-78.1	-6.71	4	35	91	156	286	0	5	0	1	1	19	11	91	6	122	0.25	0.542857	0.120879	0.583333	0.426573	231	4079	3848	1610.77	746.588	1539	13	14.4	21.3	24.4	17.7	0.57	11.4	9	102.6	143.3
NT0224	5087.43	2	Panamanian dry forests	NT	115	130	-78.45	-78.21	8.88	9.12	1.13043	-80.67	8.08	22	59	142	273	496	0	0	0	0	0	1	1	142	0	144	0	0.0169492	0.00704225	0.520147	0.290323	1	1129	1128	80.8254	101.354	51	21	26.7	26.1	28.2	26.47	0.77	7.2	1.3	227.6	68.2
NT0225	2260.58	2	Patφa Valley dry forests	NT	98	121	-77.67	-76.79	1.29	2.38	1.23469	-77.23	1.83	0	13	105	124	242	0	0	0	0	0	2	0	105	0	107	#N/A	0.153846	0	0.846774	0.442149	181	1602	1421	819.942	221.057	835	18.3	23.2	24.6	25.8	23.81	0.54	7.5	46.9	270.1	126.2
NT0226	1271.29	2	Puerto Rican dry forests	NT	120	21	-65.31	-65.24	18.29	18.39	0.175	-66.65	18.02	0	0	20	181	201	0	0	0	1	0	0	13	19	1	32	#N/A	#N/A	0.65	0.104972	0.159204	1	470	469	75.0865	86.2635	45	22.4	25.7	22.4	25.7	24.23	1.28	3.3	49.3	175.3	62.3
NT0227	3975.05	2	Sierra de la Laguna dry forests	NT	63	151	-109.65	-109.44	23.19	24.26	2.39683	-110.11	23.58	2	45	40	194	281	0	1	0	0	0	16	2	40	1	58	0	0.355556	0.05	0.206186	0.206406	1	1331	1330	420.75	208.359	402	15.4	26	17.7	29.3	21.95	4.25	13.9	0.7	51.8	2.1
NT0228	77361.7	2	Sinaloan dry forests	NT	655	874	-104.94	-102.91	22.77	28.29	1.33435	-107.22	24.35	39	131	132	325	627	1	2	3	1	9	32	5	132	7	178	0.230769	0.244275	0.0378788	0.406154	0.283892	1	2598	2597	539.409	477.003	393	11.2	21.4	21.4	30.7	23.02	3.7	19.5	0.6	129.7	13.4
NT0229	24879.3	2	Sin· Valley dry forests	NT	236	277	-74.03	-73.09	10.99	11.27	1.17373	-74.17	9.94	42	134	151	396	723	2	3	1	0	11	20	3	151	6	185	0.261905	0.149254	0.0198675	0.381313	0.255878	1	2102	2101	172.168	241.78	92	19	20.7	28	29.5	27.13	0.48	10.5	1.9	144.9	31.7
NT0230	42281.7	2	Southern Pacific dry forests	NT	942	287	-102.23	-93.4	15.64	18.23	0.304671	-99.6	16.94	68	217	148	299	732	1	5	1	2	25	66	6	148	9	245	0.367647	0.304147	0.0405405	0.494983	0.334699	1	2500	2499	409.615	446.189	259	14.9	18.9	26.9	29.7	25.37	1.21	14.8	0	139.2	17.5
NT0232	41100.2	2	Tumbes-Piura dry forests	NT	277	531	-81.33	-78.82	-7.57	-2.79	1.91697	-80.07	-5.18	10	58	71	295	434	1	3	1	2	3	17	52	71	7	143	0.3	0.293103	0.732394	0.240678	0.329493	1	4031	4030	448.616	612.638	203	12	12.8	23.4	27.4	22.72	1.68	15.4	0	5.9	20.6
NT0233	6615.68	2	Veracruz dry forests	NT	86	130	-96.82	-96.01	18.53	19.69	1.51163	-96.42	19.11	26	70	100	295	491	0	1	1	0	2	7	1	100	2	110	0.0769231	0.1	0.01	0.338983	0.224033	1	893	892	156.541	166.635	88	18.9	25.5	22.4	29.3	25.22	2.39	10.4	8.1	226.7	46
NT0235	49623.2	2	Yucatßn dry forests	NT	367	289	-87.38	-87.18	21.21	21.61	0.787466	-89.12	20.31	19	97	96	295	507	1	4	0	0	4	31	2	96	5	133	0.210526	0.319588	0.0208333	0.325424	0.262327	1	304	303	43.569	42.6128	28	22	27.2	23.6	30	26.08	2.18	8	9.4	104.4	34.6
NT0301	6869.81	3	Bahamian pine mosaic	NT	90	83	-71.15	-71.12	26.95	27.03	0.922222	-77.97	24.8	0	0	9	214	223	0	0	0	3	0	0	7	9	3	16	#N/A	#N/A	0.777778	0.0420561	0.0717489	1	40	39	4.80197	4.94313	3	18.7	27.6	23.2	28.2	24.52	2.74	9.5	23.8	102.2	56.2
NT0302	2821.95	3	Belizian pine forests	NT	52	49	-88.33	-88.25	17.9	17.95	0.942308	-88.5	17.73	14	40	130	272	456	0	0	0	0	0	0	0	130	0	130	0	0	0	0.477941	0.285088	1	979	978	155.45	244.046	35	19.6	26.1	23.6	28.2	25.25	1.84	8.6	47.1	232.6	70.2
NT0303	110942	3	Central American pine-oak forests	NT	843	500	-85.18	-84.75	17.07	17.2	0.59312	-89.17	14.96	114	214	207	349	884	2	3	2	1	31	38	19	207	8	295	0.27193	0.17757	0.0917874	0.593123	0.33371	32	3699	3667	1114.35	574.429	975	9.4	14.9	26.2	28.9	21.37	1.25	19.5	0	157.9	153.3
NT0304	6404.75	3	Cuban pine forests	NT	108	97	-74.63	-74.32	22.55	22.87	0.898148	-83.87	22.43	0	0	33	249	282	0	0	0	0	0	0	5	33	0	38	#N/A	#N/A	0.151515	0.13253	0.134752	1	889	888	112.007	156.037	44	20.7	24.9	23.3	28.2	24.93	1.98	7.5	33.6	154.7	65.7
NT0305	11560	3	Hispaniolan pine forests	NT	169	119	-72.04	-70.43	18.55	19.56	0.704142	-71.24	19.02	0	0	24	214	238	0	0	0	0	0	0	23	24	0	47	#N/A	#N/A	0.958333	0.11215	0.197479	80	2928	2848	1161.57	480.218	1100	11.9	15.4	22.9	26.4	19.77	1.28	14.5	19.8	212.3	89.8
NT0306	18853.8	3	Miskito pine forests	NT	159	206	-83.26	-83.23	15.71	15.79	1.2956	-83.97	14.84	0	0	128	240	368	0	0	0	0	0	0	0	128	0	128	#N/A	#N/A	0	0.533333	0.347826	1	262	261	38.685	38.703	25	23.4	26.1	25.7	28.2	26.2	0.88	4.8	35.7	311.2	67
NT0307	1061.07	3	Sierra de la Laguna pine-oak forests	NT	25	72	-110.05	-109.81	23.1	23.75	2.88	-109.93	23.43	3	12	39	171	225	0	0	0	1	0	2	3	39	1	44	0	0.166667	0.0769231	0.22807	0.195556	382	2041	1659	1043.04	323.92	998	13.2	23.1	14.9	24.8	18.99	3.73	11.6	2.1	136.1	9.7
NT0308	14298.3	3	Sierra Madre de Oaxaca pine-oak forests	NT	244	274	-94.7	-94.39	18.25	18.9	1.12295	-96.69	17.67	48	95	309	466	918	1	1	2	2	23	19	13	154	6	209	0.479167	0.2	0.0420712	0.330472	0.227669	135	3303	3168	1644.94	724.202	1741	10.8	15.7	22.1	27.6	18.73	1.68	16.8	0.9	130.4	47.7
NT0309	60973.5	3	Sierra Madre del Sur pine-oak forests	NT	392	247	-95.84	-95.45	18.61	19.1	0.630102	-97.56	17.03	69	168	142	330	709	12	6	1	3	35	50	13	142	22	240	0.507246	0.297619	0.0915493	0.430303	0.338505	96	3700	3604	1563.52	586.19	1568	12.1	14.8	24.4	28.4	20.33	1.28	16.3	0	119.5	12.8
NT0310	92025.5	3	Trans-Mexican Volcanic Belt pine-oak forests	NT	685	236	-98.17	-96.94	22.44	22.59	0.344526	-100.22	19.37	79	169	173	335	756	5	4	3	0	35	42	7	173	12	257	0.443038	0.248521	0.0404624	0.516418	0.339947	85	5500	5415	2074.74	629.371	2159	7	10.9	23.7	29	17.05	1.98	22	1	72.7	86.2
NT0401	145.857	4	Juan Fernßndez Islands temperate forests	NT	23	10	-79.01	-78.76	-33.68	-33.59	0.434783	-78.88	-33.63	0	0	1	12	13	0	0	1	3	0	0	3	1	4	4	#N/A	#N/A	3	0.0833333	0.307692	1	1592	1591	214.076	317.526	56	0	14.3	0	14.3	1.19	4.13	14.3	27.5	165.8	27.5
NT0402	164642	4	Magellanic subpolar forests	NT	329	851	-64.18	-63.81	-47.17	-46.25	2.58663	-73.2	-50.08	9	2	42	130	183	0	1	1	1	1	1	4	42	3	48	0.111111	0.5	0.0952381	0.323077	0.262295	1	3712	3711	373.606	351.253	256	-4.6	5	5.9	14.4	5.63	3.1	19	19.5	35.8	328.1
NT0403	6.4882	4	San FΘlix-San Ambrosio Islands temperate forests	NT	3	2	-79.92	-79.88	-26.26	-26.25	0.666667	-79.9	-26.36	0	0	0	0	0	0	0	0	0	0	0	0	0	0	0	#N/A	#N/A	#N/A	#N/A	#N/A	1	421	420	145.6	151.758	56	0	0	0	0	0	0	0	0	0	0
NT0404	248398	4	Valdivian temperate forests	NT	487	1577	-72.51	-69.92	-36.65	-32.79	3.23819	-72.81	-39.89	32	13	47	167	259	9	2	5	2	20	7	12	47	18	86	0.625	0.538462	0.255319	0.281437	0.332046	1	4722	4721	813.232	684.664	668	-3.3	8.3	10.2	21	8.62	3.66	24.3	0.5	76.4	249.1
NT0702	125589	7	Beni savanna	NT	541	488	-65.17	-62.45	-11.17	-10.77	0.902033	-65.7	-13.58	28	24	146	509	707	1	0	0	0	1	1	1	146	1	149	0.0357143	0.0416667	0.00684932	0.286837	0.21075	92	529	437	195.793	33.207	200	22	26.5	25.5	28.6	26.44	1.32	6.6	13.1	231.9	74.9
NT0703	26313	7	Campos Rupestres montane savanna	NT	154	140	-41.39	-41.21	-11.56	-11.27	0.909091	-44.87	-22.17	0	0	129	334	463	0	0	0	1	0	0	5	129	1	134	#N/A	#N/A	0.0387597	0.386228	0.289417	404	2863	2459	1109.61	262.923	1103	10.8	17.6	22	25.6	19.29	2.01	14.8	0.8	113.8	39.6
NT0704	1.91004e+06	7	Cerrado	NT	2142	2308	-43.44	-41.37	-6.35	-4.71	1.0775	-51.91	-15.12	47	60	198	571	876	0	3	8	6	0	3	14	198	17	215	0	0.05	0.0707071	0.34676	0.245434	58	1735	1677	514.82	225.879	492	13	20.6	27.2	29.9	24.28	1.24	16.9	0.6	93.6	87.3
NT0705	28.7698	7	Clipperton Island shrub and grasslands	NT	8	7	-109.26	-109.18	10.27	10.34	0.875	-109.25	10.31	0	0	0	0	0	0	0	0	0	0	0	0	0	0	0	#N/A	#N/A	#N/A	#N/A	#N/A	1	1	0	1	0	1	0	0	0	0	0	0	0	0	0	0
NT0707	104494	7	Guianan savanna	NT	334	494	-51.54	-50.59	6.5	6.64	1.47904	-60.59	3.75	45	41	177	444	707	1	0	0	1	8	2	2	177	2	189	0.177778	0.0487805	0.0112994	0.398649	0.267327	1	2691	2690	353.138	407.06	200	14.8	16	26.7	28.7	25.63	0.54	13.9	16.2	223.9	219.5
NT0708	291590	7	Humid Chaco	NT	658	1017	-58.96	-55.76	-21.54	-20.99	1.54559	-59.1	-25.82	55	106	145	404	710	1	0	4	0	1	0	2	145	5	148	0.0181818	0	0.0137931	0.358911	0.208451	13	538	525	71.2009	28.5616	65	13.1	26	21.1	29	22.27	3.95	15.9	6.3	95.8	101.1
NT0709	375787	7	Llanos	NT	1328	822	-62.98	-61.88	6.36	9.96	0.618976	-67.88	6.27	40	95	175	430	740	2	4	2	0	5	13	2	175	8	195	0.125	0.136842	0.0114286	0.406977	0.263514	1	1022	1021	142.338	119.531	106	22.4	24.8	27.8	30.3	27.19	0.71	7.9	0.6	150	81.7
NT0710	352496	7	Uruguayan savanna	NT	780	838	-50.64	-50.18	-28.28	-27.44	1.07436	-54.31	-31.21	37	52	92	350	531	2	0	1	1	3	0	1	92	4	96	0.0810811	0	0.0108696	0.262857	0.180791	1	758	757	141.795	118.714	115	10.5	21.7	15.8	26.6	18.35	4.31	16.1	57.8	89.2	162.3
NT0801	298735	8	Espinal	NT	648	1296	-60.65	-57.52	-32.09	-28.66	2	-65.33	-35.23	33	50	49	284	416	0	0	1	0	0	0	0	49	1	49	0	0	0	0.172535	0.117788	1	1617	1616	190.293	172.38	136	6.6	21.3	15.2	26.6	17.19	5.25	20	2.3	39.8	69.4
NT0802	353640	8	Low Monte	NT	622	1428	-70.18	-62.89	-44.23	-31.37	2.29582	-66.53	-37.8	10	65	74	204	353	0	11	4	0	0	17	0	74	15	91	0	0.261538	0	0.362745	0.25779	1	2173	2172	421.746	292.101	367	1.1	16.2	10.6	27	14.75	5.79	25.9	0.5	7.4	39.4
NT0803	398555	8	Humid Pampas	NT	749	817	-60.6	-56.67	-33.54	-31.67	1.09079	-60.79	-35.34	30	42	64	262	398	0	0	3	1	0	0	1	64	4	65	0	0	0.015625	0.244275	0.163317	1	1069	1068	97.7079	76.0375	86	5.8	19.5	12.2	25.6	15.94	5.1	19.8	13.1	72.3	68.8
NT0805	576599	8	Patagonian steppe	NT	586	2153	-58.54	-57.71	-37.94	-33.37	3.67406	-69.05	-43.05	10	44	56	172	282	2	13	3	4	7	19	8	56	22	90	0.7	0.431818	0.142857	0.325581	0.319149	1	3893	3892	637.67	467.517	584	-4.4	6.7	7	22.6	8.71	4.85	27	0.3	7.1	224.1
NT0902	5646.5	9	Cuban wetlands	NT	267	112	-77.04	-76.97	22.91	23.08	0.419476	-78.48	21.22	0	0	36	250	286	0	0	0	0	0	0	7	36	0	43	#N/A	#N/A	0.194444	0.144	0.15035	1	119	118	3.77846	5.02365	3	20.9	27	23.6	28.1	25.02	2.13	7.2	15.2	168.3	38
NT0903	628.437	9	Enriquillo wetlands	NT	35	21	-68.74	-68.61	18.47	18.66	0.6	-71.66	18.49	0	0	24	206	230	0	0	0	0	0	0	18	24	0	42	#N/A	#N/A	0.75	0.116505	0.182609	1	835	834	33.699	95.5848	1	22.8	28.6	24.4	28.6	26.91	1.58	5.8	23.8	254	29.3
NT0904	20028.3	9	Everglades	NT	170	232	-80.04	-80.03	26.55	27.21	1.36471	-80.91	26.16	18	45	35	210	308	0	0	0	0	0	1	0	1	0	2	0	0.0222222	0	0.0047619	0.00649351	1	9	8	2.95469	1.58107	3	16.8	27.2	19.1	28.1	23.27	3.65	11.3	35.9	183.7	61.3
NT0905	2923.88	9	Guayaquil flooded grasslands	NT	49	150	-79.86	-79.42	-2.91	-1.56	3.06122	-79.64	-2.23	8	10	67	165	250	0	0	0	0	2	0	1	67	0	70	0.25	0	0.0149254	0.406061	0.28	1	610	609	77.9491	80.5704	45	23.4	25.8	24.6	27.2	25.36	0.94	3.8	0.3	266.6	5.6
NT0906	5988.45	9	Orinoco wetlands	NT	100	137	-61.76	-61.35	10.1	10.37	1.37	-62.45	9.28	0	14	143	303	460	0	0	0	0	0	0	0	143	0	143	#N/A	0	0	0.471947	0.31087	1	152	151	7.40834	13.1518	1	25.5	27.2	26.1	27.8	26.8	0.57	2.3	26.4	183.7	52.8
NT0907	170501	9	Pantanal	NT	568	641	-55.27	-54.8	-15.57	-15.01	1.12852	-57.95	-18.33	24	36	128	423	611	0	3	0	1	0	4	1	128	4	133	0	0.111111	0.0078125	0.3026	0.217676	54	1040	986	146.967	68.5283	123	20.5	26.4	23.4	28.9	26.03	2.05	8.4	8.4	144.9	48.2
NT0908	37099.3	9	Paranß flooded savanna	NT	323	989	-60.85	-57.56	-34.3	-25.39	3.06192	-59.71	-29.85	29	27	76	325	457	0	0	1	0	0	0	0	76	1	76	0	0	0	0.233846	0.166302	1	85	84	19.7097	16.0647	16	10.4	24.1	18.2	28.3	19.11	4.61	17.9	29.9	121.2	60.2
NT0909	26866.6	9	Southern Cone Mesopotamian savanna	NT	235	320	-57.72	-55.3	-30.18	-27.31	1.3617	-56.51	-28.75	35	57	71	329	492	0	0	0	0	0	0	1	71	0	72	0	0	0.0140845	0.215805	0.146341	22	293	271	71.6748	30.0243	62	14.1	26.2	16.5	26.6	20.91	4.13	12.5	65.3	139.5	122
NT1001	254929	10	Central Andean dry puna	NT	412	1147	-65.39	-65.14	-23.01	-16.66	2.78398	-67.45	-21.82	12	27	70	124	233	4	11	2	1	9	19	5	70	18	103	0.75	0.703704	0.0714286	0.564516	0.44206	2166	6634	4468	3987.24	533.223	3952	-3.7	3.8	8.7	16.3	6.54	2.64	20	0.2	8.9	11.4
NT1002	211478	10	Central Andean puna	NT	681	1443	-65.89	-64.16	-16.59	-13.08	2.11894	-65.73	-23.29	23	28	115	203	369	5	5	0	6	10	14	34	115	16	173	0.434783	0.5	0.295652	0.566502	0.468835	725	6343	5618	3946.17	648.67	3991	-4.5	2.8	15	25	7.22	2.63	29.5	0.3	14	21.9
NT1003	116874	10	Central Andean wet puna	NT	624	625	-67.4	-67.3	-13.86	-8.23	1.0016	-70.44	-15.03	30	19	132	242	423	7	1	2	7	17	8	50	132	17	207	0.566667	0.421053	0.378788	0.545455	0.489362	1329	6710	5381	4201.51	495.826	4144	-1.2	1.7	15.4	19.6	6.57	1.27	20.8	0.7	96	62.8
NT1004	12119.7	10	Cordillera Central pßramo	NT	168	309	-77.78	-76.51	-4.35	-4.09	1.83929	-77.45	-7.79	14	1	83	152	250	5	0	0	1	13	1	10	83	6	107	0.928571	1	0.120482	0.546053	0.428	1081	5050	3969	3528.91	638.564	3664	6.8	8	18.7	20.2	11.32	0.39	13.4	5.4	115.7	60.1
NT1005	2797.6	10	Cordillera de Merida pßramo	NT	102	95	-70.15	-70.1	9.48	9.62	0.931373	-71.04	8.79	3	0	164	77	244	1	0	0	2	1	0	8	164	3	173	0.333333	#N/A	0.0487805	2.12987	0.709016	1830	4991	3161	3480.72	470.539	3512	7.6	8.8	13	15	10.95	0.31	7.4	4.2	85.1	23.1
NT1006	29810.5	10	Northern Andean pßramo	NT	107	232	-72.45	-72.02	10.07	10.39	2.16822	-72.25	6.45	93	50	203	157	503	24	3	0	3	74	34	11	203	30	322	0.795699	0.68	0.0541872	1.29299	0.640159	743	6251	5508	3590.15	492.102	3650	5.1	6	14.7	16.8	10.33	0.25	11.7	3.7	55.6	134.8
NT1007	1238.66	10	Santa Marta pßramo	NT	67	41	-73.95	-73.34	10.63	11	0.61194	-73.65	10.81	4	0	140	56	200	1	0	0	0	4	0	3	140	1	147	1	#N/A	0.0214286	2.5	0.735	1849	5421	3572	3734.2	623.84	3716	6.4	9.9	11.4	13.6	10.28	0.75	7.2	33.2	274.9	34.7
NT1008	124779	10	Southern Andean steppe	NT	477	1365	-69.31	-66.06	-31.36	-24.3	2.86164	-69.84	-30.45	9	53	58	135	255	3	26	1	0	4	34	2	58	30	98	0.444444	0.641509	0.0344828	0.42963	0.384314	967	6795	5828	3594.9	979.554	3715	-10.1	0.3	8.1	23.9	4.35	3.9	34	0.6	6.1	35.1
NT1010	116569	10	High Monte	NT	393	929	-65.54	-65.23	-24.02	-23.1	2.36387	-67.45	-28.04	0	0	0	0	0	0	0	0	0	0	0	0	0	0	0	#N/A	#N/A	#N/A	#N/A	#N/A	505	6106	5601	1819.83	916.287	1676	-1.2	9.5	11.2	27	14.35	5.27	28.2	0.8	19.8	31.7
NT1201	148381	12	Chilean matorral	NT	380	1837	-71.59	-69.09	-29.04	-22.96	4.83421	-71.12	-31.22	6	24	51	131	212	0	11	2	0	1	18	7	51	13	77	0.166667	0.75	0.137255	0.389313	0.363208	1	4829	4828	977.784	978.039	582	-1.7	7.5	13.8	21.5	12.96	3.33	23.2	0	1.4	70.8
NT1301	5260.18	13	Araya and Paria xeric scrub	NT	242	47	-61.96	-61.84	11.35	11.39	0.194215	-63.23	10.54	1	3	141	339	484	0	0	0	0	0	1	0	141	0	142	0	0.333333	0	0.415929	0.293388	1	933	932	175.992	158.888	132	23.4	25.7	25.7	28.4	26.06	0.74	5	9.7	81.5	36.8
NT1303	104903	13	Atacama desert	NT	201	881	-70.39	-68.43	-26.31	-18.39	4.38308	-69.41	-22.35	0	1	33	97	131	0	0	0	1	0	1	3	33	1	37	#N/A	1	0.0909091	0.340206	0.282443	1	4678	4677	1690.96	757.113	1508	2.1	8.3	15	22.2	13.54	2.34	20.1	0	0.4	1.5
NT1304	731320	13	Caatinga	NT	1034	1468	-41.86	-34.98	-6.44	-2.9	1.41973	-39.73	-9.77	0	0	122	320	442	0	0	1	4	0	0	11	122	5	133	#N/A	#N/A	0.0901639	0.38125	0.300905	1	1734	1733	422.608	225.257	428	17.7	21.4	26.9	29.7	25.33	1.08	12	0.7	45.9	89.7
NT1305	3117.97	13	Caribbean shrublands	NT	43	48	-59.65	-59.42	18.7	18.76	1.11628	-69.05	12.21	0	0	8	152	160	0	0	0	0	0	0	3	8	0	11	#N/A	#N/A	0.375	0.0526316	0.06875	1	642	641	48.0693	69.4655	22	21.3	25.7	26.5	29.1	26.1	1.02	7.8	12.6	94.7	67.8
NT1306	3255.7	13	Cuban cactus scrub	NT	148	48	-75.44	-74.13	23.14	23.21	0.324324	-74.79	20.1	0	0	30	244	274	0	0	0	0	0	0	5	30	0	35	#N/A	#N/A	0.166667	0.122951	0.127737	1	699	698	86.8868	119.509	38	20.7	25	24.6	28.6	25.19	1.62	7.9	26.1	163.6	38.8
NT1307	7978.25	13	Galßpagos Islands scrubland mosaic	NT	90	135	-89.62	-89.24	0.54	0.65	1.5	-91.19	-0.44	1	26	12	92	131	0	9	2	7	0	18	23	12	18	53	0	0.692308	1.91667	0.130435	0.40458	1	1669	1668	286.822	296.194	198	19.2	24.1	22.3	26.6	22.85	1.72	7.4	5.4	50.4	46.3
NT1308	31477.4	13	Guajira-Barranquilla xeric scrub	NT	273	291	-73.61	-71.11	10.87	12.46	1.06593	-72.86	11.16	8	51	152	387	598	0	1	0	0	0	7	6	152	1	165	0	0.137255	0.0394737	0.392765	0.27592	1	1526	1525	101.807	140.36	58	20.8	24.8	28.2	30	27.77	0.66	9.2	0.6	128.7	24.3
NT1309	68181.5	13	La Costa xeric shrublands	NT	690	225	-64.67	-62.98	10.27	10.75	0.326087	-66.14	9.74	13	11	162	395	581	0	1	0	1	1	2	5	162	2	170	0.0769231	0.181818	0.0308642	0.410127	0.292599	1	1900	1899	286.2	249.976	181	18.3	21	26.8	29.6	25.78	0.64	11.3	1.4	98	55.4
NT1311	7.6556	13	Malpelo Island xeric scrub	NT	4	4	-81.62	-81.58	3.96	3.99	1	-81.6	3.98	0	4	0	0	4	0	2	0	0	0	3	0	0	2	3	#N/A	0.75	#N/A	#N/A	0.75	1	35	34	14.6	16.2555	2	0	0	0	0	0	0	0	0	0	0
NT1312	2328.41	13	Motagua Valley thornscrub	NT	111	62	-90.21	-89.18	14.73	15.28	0.558559	-89.7	15	23	89	128	115	355	0	0	1	0	0	1	0	128	1	129	0	0.011236	0	1.11304	0.36338	117	2218	2101	650.011	412.809	537	16.2	21.3	23.1	27.4	23.73	1.59	11.2	8.2	190.7	56.6
NT1313	15909.2	13	Paraguana xeric scrub	NT	256	288	-71.59	-69.25	9.61	12.2	1.125	-71.09	10.91	2	7	145	316	470	0	2	0	0	0	3	6	145	2	154	0	0.428571	0.0413793	0.458861	0.32766	1	1650	1649	363.036	332.856	264	22	23.5	27.4	30.2	26.76	0.79	8.2	3.1	66.7	32.2
NT1314	3867.26	13	San Lucan xeric scrub	NT	95	166	-109.82	-109.4	24.53	24.59	1.74737	-109.64	23.61	2	48	48	190	288	0	0	0	0	0	19	2	48	0	69	0	0.395833	0.0416667	0.252632	0.239583	1	720	719	162.253	110.568	150	16.7	27.2	18.4	30.3	22.64	4.08	13.6	0.5	64.6	2.3
NT1315	184213	13	Sechura desert	NT	1246	1502	-76.22	-69.63	-6.47	-5.04	1.20546	-76.79	-11.76	6	57	53	168	284	2	14	2	2	4	38	17	53	20	112	0.666667	0.666667	0.320755	0.315476	0.394366	1	6297	6296	1861.01	1412.97	1591	0	2.9	20.9	27.1	14.63	1.51	27.1	0	0	11.1
NT1316	9861.78	13	Tehuacßn Valley matorral	NT	98	177	-97.95	-97.15	18.05	19.64	1.80612	-97.61	18.81	28	66	95	169	358	1	1	0	0	7	10	1	95	2	113	0.25	0.151515	0.0105263	0.56213	0.315642	871	3362	2491	2139.69	372.147	2215	10.1	14.6	19.1	25.5	16.68	1.83	15.4	1.1	105.3	12.4
NT1318	6.0422	13	St. Peter and St. Paul rocks	NT	4	2	-29.3	-29.28	0.92	0.92	0.5	-29.3	0.91	0	0	0	0	0	0	0	0	0	0	0	0	0	0	0	#N/A	#N/A	#N/A	#N/A	#N/A							0	0	0	0	0	0	0	0	0	0
NT1401	40894.4	14	Amazon-Orinoco-Southern Caribbean mangroves	NT	313	151	-42.57	-41.82	12.41	12.63	0.482428	-46.17	-1.18	0	0	2	82	84	0	0	0	0	0	0	0	2	0	2	#N/A	#N/A	0	0.0243902	0.0238095	1	510	509	5.43753	17.6478	1	24.7	26.4	27.9	30.1	26.96	0.41	5.4	0.6	20.4	252.8
NT1402	17859.4	14	Bahamian-Antillean mangroves	NT	181	112	-61.03	-60.98	26.86	26.88	0.618785	-73.06	21.2	0	0	2	84	86	0	0	0	0	0	0	0	2	0	2	#N/A	#N/A	0	0.0238095	0.0232558	1	1144	1143	13.0408	54.8897	2	19.1	26	25.9	28.6	25.32	2.05	9.5	16.8	81.4	96
NT1403	26658.3	14	Mesoamerican Gulf-Caribbean mangroves	NT	163	154	-77.86	-77.82	22.35	22.96	0.944785	-92.1	18.66	0	0	1	142	143	0	0	0	0	0	0	0	1	0	1	#N/A	#N/A	0	0.00704225	0.00699301	1	596	595	6.42709	15.1048	2	18.5	26.3	25.9	29.5	26	1.8	11	9.6	115.1	179.5
NT1404	8174.09	14	Northern Mesoamerican Pacific mangroves	NT	106	120	-95.59	-95.51	29.31	29.37	1.13208	-107.55	24.53	0	0	1	69	70	0	0	0	0	0	0	0	1	0	1	#N/A	#N/A	0	0.0144928	0.0142857	1	322	321	4.67791	11.9389	2	17.2	26.5	27.4	31.3	24.63	3.4	14.1	0.5	12.3	2.8
NT1405	13460.9	14	South American Pacific mangroves	NT	117	164	-77.18	-77.13	8.75	9.15	1.40171	-80.08	-2.9	29	113	3	92	237	0	0	0	0	0	1	0	3	0	4	0	0.00884956	0	0.0326087	0.0168776	1	564	563	33.1875	59.2049	6	23	25.4	26.1	28.2	25.73	0.57	5.2	0.4	32.5	399.9
NT1406	10025.3	14	Southern Atlantic mangroves	NT	79	127	-34.96	-34.8	-2.93	-2.85	1.60759	-36.93	-10.75	0	0	2	92	94	0	0	0	0	0	0	0	2	0	2	#N/A	#N/A	0	0.0217391	0.0212766	1	981	980	25.7254	53.2334	6	15.9	23.2	26	27.9	24.19	1.65	12	1	94.1	149.3
NT1407	7826.6	14	Southern Mesoamerican Pacific mangroves	NT	145	103	-80.94	-80.89	16.29	16.37	0.710345	-93.06	15.36	31	73	3	85	192	0	0	0	0	3	5	0	3	0	11	0.0967742	0.0684932	0	0.0352941	0.0572917	1	612	611	14.3618	32.9818	4	25.1	27	27.6	30.2	27.35	0.76	5.1	0.3	278.4	56.3
OC0101	577.762	1	Carolines tropical moist forests	OC	25	22	163.02	163.03	8.99	8.99	0.88	158.22	6.88	0	0	7	55	62	0	0	2	4	0	0	16	6	6	22	#N/A	#N/A	2.28571	0.109091	0.354839	1	655	654	144.219	144.177	103	26.2	26.8	26.2	26.8	26.53	0.2	0.6	255.3	460.7	255.3
OC0102	611.856	1	Central Polynesian tropical moist forests	OC	44	40	-150.22	-150.21	16.73	16.74	0.909091	-157.66	1.88	0	0	0	17	17	0	0	0	1	0	0	1	0	1	1	#N/A	#N/A	#N/A	0	0.0588235	1	19	18	1.28125	1.55089	1	0	0	0	0	0	0	0	0	0	0
OC0103	211.971	1	Cook Islands tropical moist forests	OC	11	11	-157.35	-157.31	-18.87	-18.83	1	-159.77	-21.23	0	0	1	22	23	0	0	0	4	0	0	8	0	4	8	#N/A	#N/A	8	0	0.347826	1	602	601	69.6867	111.299	22	0	0	0	0	0	0	0	0	0	0
OC0104	530.166	1	Eastern Micronesia tropical moist forests	OC	22	27	176.79	176.85	19.3	19.32	1.22727	173.02	1.83	0	0	0	32	32	0	0	0	1	0	0	4	0	1	4	#N/A	#N/A	#N/A	0	0.125	1	4	3	1.05351	0.33294	1	0	0	0	0	0	0	0	0	0	0
OC0105	11571.8	1	Fiji tropical moist forests	OC	146	96	179.98	180	-12.52	-12.48	0.657534	179.31	-16.58	0	0	7	73	80	0	0	1	9	0	0	31	3	10	34	#N/A	#N/A	4.42857	0.0410959	0.425	1	2732	2731	216.859	200.408	159	20	24.3	24	27.3	24.24	1.38	7.3	59.4	334	91.3
OC0106	6717.54	1	Hawaii tropical moist forests	OC	105	99	-155.71	-154.81	21.92	22.23	0.942857	-155.31	19.77	0	0	1	75	76	0	0	0	5	0	0	31	0	5	31	#N/A	#N/A	31	0	0.407895	1	2179	2178	660.254	463.764	591	18.4	21.4	21.7	26.1	22.05	1.35	7.7	48	174.1	254.2
OC0107	33.7356	1	Kermadec Islands subtropical moist forests	OC	9	7	-177.98	-177.88	-29.3	-29.24	0.777778	-177.93	-29.27	0	0	0	16	16	0	0	0	0	0	0	0	0	0	0	#N/A	#N/A	#N/A	0	0	1	466	465	173.773	126.154	202	0	0	0	0	0	0	0	0	0	0
OC0108	1074.15	1	Marquesas tropical moist forests	OC	39	20	-138.67	-138.59	-7.83	-7.83	0.512821	-138.98	-9.78	0	0	0	23	23	0	0	0	8	0	0	11	0	8	11	#N/A	#N/A	#N/A	0	0.478261	1	1224	1223	253.731	283.708	144	0	0	0	0	0	0	0	0	0	0
OC0109	96.2475	1	Ogasawara subtropical moist forests	OC	6	11	153.97	153.99	27.67	27.68	1.83333	142.15	26.66	0	0	2	1	3	0	0	2	0	0	0	0	2	2	2	#N/A	#N/A	0	2	0.666667	1	391	390	43.9604	70.2154	4	0	0	0	0	0	0	0	0	0	0
OC0110	459.749	1	Palau tropical moist forests	OC	20	45	134.72	134.72	8.07	8.09	2.25	134.56	7.53	0	3	3	75	81	0	0	0	4	0	0	15	2	4	17	#N/A	0	5	0.0266667	0.209877	1	228	227	47.3406	55.7532	22	27.2	27.9	27.2	27.9	27.53	0.24	0.7	187.6	425.8	187.6
OC0111	178.038	1	Rapa Nui subtropical broadleaf forests	OC	22	16	-109.46	-109.23	-27.2	-27.06	0.727273	-109.34	-27.13	0	0	0	1	1	0	0	0	0	0	0	0	0	0	0	#N/A	#N/A	#N/A	0	0	1	466	465	114	113.162	69	0	20.1	0	20.1	1.68	5.8	20.1	71.4	147.2	71.4
OC0112	3082.52	1	Samoan tropical moist forests	OC	69	41	-169.52	-169.42	-13.8	-13.43	0.594203	-172.48	-13.62	0	0	4	48	52	0	0	1	5	0	0	17	2	6	19	#N/A	#N/A	4.25	0.0416667	0.365385	1	1811	1810	355.452	376.992	247	0	0	0	0	0	0	0	0	0	0
OC0113	1620.46	1	Society Islands tropical moist forests	OC	52	42	-148.09	-148.06	-15.82	-15.79	0.807692	-149.38	-17.69	0	0	0	24	24	0	0	0	2	0	0	9	0	2	9	#N/A	#N/A	#N/A	0	0.375	1	1680	1679	326.034	277.998	279	0	0	0	0	0	0	0	0	0	0
OC0114	937.766	1	Tongan tropical moist forests	OC	33	23	-169.95	-169.78	-15.64	-15.56	0.69697	-175.2	-21.17	0	0	4	33	37	0	0	0	1	0	0	9	2	1	11	#N/A	#N/A	2.25	0.0606061	0.297297	1	1261	1260	36.3393	109.29	1	0	0	0	0	0	0	0	0	0	0
OC0115	943.127	1	Tuamotu tropical moist forests	OC	24	30	-128.35	-128.29	-14.11	-14.09	1.25	-146.36	-16.18	0	0	0	25	25	0	0	0	6	0	0	12	0	6	12	#N/A	#N/A	#N/A	0	0.48	1	390	389	4.91819	26.018	1	0	0	0	0	0	0	0	0	0	0
OC0116	141.631	1	Tubuai tropical moist forests	OC	9	10	-144.38	-144.3	-21.8	-21.78	1.11111	-144.36	-27.61	0	0	0	12	12	0	0	0	1	0	0	3	0	1	3	#N/A	#N/A	#N/A	0	0.25	1	554	553	121	132.179	50	0	0	0	0	0	0	0	0	0	0
OC0117	92.7339	1	Western Polynesian tropical moist forests	OC	12	12	179.85	179.86	0.8	0.81	1	-171.63	-2.82	0	0	1	23	24	0	0	0	0	0	0	0	0	0	0	#N/A	#N/A	0	0	0	1	9	8	1.5	1.47834	1	0	0	0	0	0	0	0	0	0	0
OC0201	6889.81	2	Fiji tropical dry forests	OC	145	98	178.48	179.84	-16.86	-16.19	0.675862	177.81	-17.75	0	0	6	0	6	0	0	0	0	0	0	0	2	0	2	#N/A	#N/A	0	#N/A	0.333333	1	1133	1132	168.238	171.822	125	19.8	24	24.5	27.9	24.5	1.24	8.1	43.1	324.4	73.5
OC0202	6614.43	2	Hawaii tropical dry forests	OC	112	147	-156.03	-154.97	21.87	22.2	1.3125	-155.8	19.61	0	0	1	68	69	0	0	0	0	0	0	24	0	0	24	#N/A	#N/A	24	0	0.347826	1	3050	3049	820.169	715.21	578	19.6	23	22	26.5	23.24	1.59	6.9	8.2	119.7	192.5
OC0203	1032.12	2	Marianas tropical dry forests	OC	36	46	146.06	146.08	20.53	20.54	1.27778	144.79	13.45	0	0	2	59	61	0	0	0	3	0	0	13	1	3	14	#N/A	#N/A	6.5	0.0169492	0.229508	1	903	902	84.0228	117.112	31	26.6	28	26.7	28.1	27.44	0.45	1.5	74	325.3	89.3
OC0204	101.452	2	Yap tropical dry forests	OC	16	22	140.51	140.53	9.9	9.92	1.375	138.12	9.54	0	0	2	49	51	0	0	1	1	0	0	7	2	2	9	#N/A	#N/A	3.5	0.0408163	0.176471	1	115	114	22.8142	23.766	15	0	0	0	0	0	0	0	0	0	0
OC0701	1847.59	7	Hawaii tropical high shrublands	OC	42	66	-155.56	-155.39	20.66	20.77	1.57143	-155.59	19.46	0	0	1	20	21	0	0	0	0	0	0	14	0	0	14	#N/A	#N/A	14	0	0.666667	1574	4148	2574	2663.78	594.741	2542	15.3	18.1	15.3	18.1	16.96	1	2.8	105.1	303.2	105.1
OC0702	1517.52	7	Hawaii tropical low shrublands	OC	41	66	-155.77	-155.6	22.02	22.11	1.60976	-155.87	19.94	0	0	1	58	59	0	0	0	0	0	0	13	0	0	13	#N/A	#N/A	13	0	0.220339	1	784	783	136.291	148.469	82	20.2	23.6	21.4	25	22.7	1.39	4.8	0	88.9	59.6
OC0703	14.738	7	Northwestern Hawaii scrub	OC	3	3	-161.93	-161.91	28.39	28.4	1	-177.38	28.21	0	0	0	47	47	0	0	0	3	0	0	5	0	3	5	#N/A	#N/A	#N/A	0	0.106383	1	277	276	32.5556	86.4344	1	0	0	0	0	0	0	0	0	0	0
PA0101	269132	1	Guizhou Plateau broadleaf and mixed forests	PA	836	663	103.68	112.27	24.95	30.91	0.793062	107.97	27.93	87	115	142	482	826	2	0	0	0	8	0	0	1	2	9	0.091954	0	0	0.00207469	0.0108959	11	4685	4674	920.075	453.834	911	-0.4	17.9	10.5	29.2	15	7.45	29.6	8.4	144.2	46.5
PA0102	239854	1	Yunnan Plateau subtropical evergreen forests	PA	751	645	99.15	106.6	23.21	29.02	0.858855	102.87	26.11	110	137	174	664	1085	1	1	0	0	9	4	0	0	2	13	0.0818182	0.0291971	0	0	0.0119816	152	4672	4520	1829.84	578.598	1878	-3.1	12.2	15	28.4	15.24	4.98	31.5	3.6	145.5	20.8
PA0401	16147.2	4	Appenine deciduous montane forests	PA	155	192	12.82	14.68	44.08	44.75	1.23871	13.43	42.14	18	15	63	156	252	0	0	0	0	1	0	0	2	0	3	0.0555556	0	0	0.0128205	0.0119048	188	2689	2501	1014.52	390.501	967	-1	16	4.6	21.6	9.66	6.51	22.6	32.3	82.4	72.1
PA0402	400447	4	Atlantic mixed forests	PA	1222	1515	8.76	12.56	55.33	56.7	1.23977	3.72	49.88	23	17	77	273	390	0	0	0	0	0	0	0	0	0	0	0	0	0	0	0	-6	832	838	82.4258	68.9306	69	-0.6	15.1	8.1	21.4	10.33	5.54	22	31.6	45.5	96.2
PA0403	2616.87	4	Azores temperate mixed forests	PA	65	23	-25.2	-25.01	39.65	39.73	0.353846	-25.5	37.81	0	0	2	29	31	0	0	1	0	0	0	1	1	1	2	#N/A	#N/A	0.5	0.0344828	0.0645161	1	2260	2259	327.912	273.69	293	9.8	18.8	13.6	21.7	15.37	3.05	11.9	34.7	121.9	55.3
PA0404	224768	4	Balkan mixed forests	PA	863	532	18.68	29.12	40.44	45.21	0.616454	22.07	42.83	18	37	97	285	437	0	0	0	0	0	0	0	5	0	5	0	0	0	0.0175439	0.0114416	1	2626	2625	393.288	354.771	268	-6.1	11.3	5.3	25.2	10.79	7.83	31.3	10.1	40.5	81.5
PA0405	117107	4	Baltic mixed forests	PA	399	496	14.7	18.82	57.22	57.75	1.24311	11.56	54.82	15	6	62	225	308	0	0	0	0	0	0	0	0	0	0	0	0	0	0	0	-2	309	311	59.3114	48.6525	48	-5.1	15.1	0.6	19.4	7.91	6.96	24.5	23.4	55.2	49.7
PA0406	79846.5	4	Cantabrian mixed forests	PA	737	394	-8.89	-0.21	42.52	43.78	0.5346	-8.41	42.01	21	33	77	220	351	0	1	0	0	0	2	0	3	1	5	0	0.0606061	0	0.0136364	0.014245	1	2420	2419	574.195	403.125	503	-0.3	14.3	10	21.8	11.66	4.7	22.1	8.5	83.1	62.1
PA0407	55131.8	4	Caspian Hyrcanian mixed forests	PA	839	391	47.2	56.65	38.15	39.3	0.466031	56.12	37.66	7	30	68	296	401	0	0	0	1	0	0	1	0	1	1	0	0	0.0147059	0	0.00249377	-28	4670	4698	1018.8	851.389	948	-11.9	15.8	7.9	29.9	13.34	8.65	41.8	0.2	24	42.7
PA0408	170538	4	Caucasus mixed forests	PA	783	622	39.12	48.85	38.91	44.24	0.794381	47.39	41.57	12	60	97	258	427	0	0	5	0	0	0	1	6	5	7	0	0	0.0103093	0.0232558	0.0163934	-28	5483	5511	1639.87	827.849	1669	-17.4	8.6	6	26.1	6.39	8.89	43.5	13.3	33.1	138.5
PA0409	210027	4	Celtic broadleaf forests	PA	495	705	-2.37	1.76	55.77	57.72	1.42424	-2.02	54.55	6	5	46	210	267	0	0	0	0	0	0	0	0	0	0	0	0	0	0	0	1	1068	1067	138.974	116.366	99	0	11.6	6.3	16.5	8.68	4.23	16.5	32.5	50.8	172.7
PA0410	101493	4	Central Anatolian steppe and woodlands	PA	590	418	30.96	37.82	36.77	40.52	0.708475	34.39	38.64	0	0	51	244	295	0	0	0	0	0	0	0	1	0	1	#N/A	#N/A	0	0.00409836	0.00338983	392	3661	3269	1230.29	280.714	1166	-6.8	15.5	1.8	23.4	9.86	7.82	30.2	3.5	37.7	18.1
PA0411	359867	4	Central China loess plateau mixed forests	PA	1581	1082	119.63	122.45	41.48	43.94	0.684377	113.3	38.96	16	49	110	576	751	0	0	0	0	0	1	2	0	0	3	0	0.0204082	0.0181818	0	0.00399467	2	2988	2986	980.847	494.87	1026	-19.7	14.4	0.6	27.7	8.18	10.91	47.4	1.2	88.4	9.1
PA0412	733978	4	Central European mixed forests	PA	1715	1204	30.69	35.39	50.22	56.01	0.702041	22.58	50.09	18	14	102	259	393	0	0	0	0	0	0	0	0	0	0	0	0	0	0	0	-30	1425	1455	168.893	83.6858	156	-10	15.9	0.4	22.6	7.57	8.58	32.6	20.8	53.4	50.8
PA0413	104602	4	Central Korean deciduous forests	PA	437	615	126.36	129.59	37.59	40.44	1.40732	127.12	37.68	0	0	71	99	170	0	0	0	0	0	0	0	1	0	1	#N/A	#N/A	0	0.010101	0.00588235	-40	1732	1772	227.137	220.863	159	-10	19.4	1.1	26.4	10.69	10.17	36.4	12	179.3	40
PA0414	93437.5	4	Changbai Mountains mixed forests	PA	466	486	128.81	130.27	44.99	45.74	1.04292	127.48	42.09	12	16	82	389	499	0	0	0	0	0	0	0	0	0	0	0	0	0	0	0	10	2565	2555	898.465	393.762	827	-22.9	13.7	-6.9	23.3	2.51	13.24	46.2	3.7	133.4	25.8
PA0415	437582	4	Changjiang Plain evergreen forests	PA	1094	821	122.07	122.33	32.07	33.94	0.750457	116.48	30.27	65	97	115	551	828	0	0	0	0	7	3	0	0	0	10	0.107692	0.0309278	0	0	0.0120773	1	1713	1712	113.487	164.246	50	0	23.8	7.1	30.2	16.23	8.99	30.2	10.2	96.9	52.5
PA0416	30214.6	4	Crimean Submediterranean forest complex	PA	372	154	37.31	42	44.38	45.26	0.413978	39.66	44.45	11	24	77	202	314	0	0	0	0	0	0	0	0	0	0	0	0	0	0	0	1	1927	1926	387.762	315.685	288	-3.9	17.9	3.5	23.3	10.65	7.92	27.2	27.6	51.6	77.9
PA0417	168170	4	Daba Mountains evergreen forests	PA	887	454	103.58	112.88	29.26	33.35	0.511838	108.23	31.31	56	78	141	460	735	0	0	0	0	0	2	1	1	0	4	0	0.025641	0.0070922	0.00217391	0.00544218	19	3435	3416	793.654	485.146	694	-3.3	18	8.1	29.2	14.41	8.02	32.5	2.7	126	26.4
PA0418	58285.5	4	Dinaric Mountains mixed forests	PA	588	485	19.25	20.62	45.6	46.45	0.82483	16.9	44.27	18	29	79	233	359	0	0	0	0	2	3	0	1	0	6	0.111111	0.103448	0	0.00429185	0.0167131	44	2631	2587	972.037	374.682	942	-5.5	12.3	2.1	20.6	7.66	7.03	26.1	54.2	81.1	142
PA0419	730128	4	East European forest steppe	PA	1902	826	57.65	59.08	56.55	57.47	0.43428	44.22	52.55	16	21	116	249	402	0	0	0	0	0	0	0	1	0	1	0	0	0	0.00401606	0.00248756	1	1006	1005	182.026	76.0152	174	-17.8	17.6	1.7	22.6	5.14	11.34	40.4	20.5	41.3	40.9
PA0420	81627.5	4	Eastern Anatolian deciduous forests	PA	467	397	40.34	41.91	37.21	40.44	0.850107	38.96	38.66	0	0	36	185	221	0	0	0	0	0	0	0	1	0	1	#N/A	#N/A	0	0.00540541	0.00452489	377	3292	2915	1436.38	478.652	1433	-8.3	15.2	4.5	31.1	10.65	9.38	39.4	0.1	55.2	23
PA0421	45769.9	4	English Lowlands beech forests	PA	335	233	-1.51	1.77	50.58	52.6	0.695522	-0.67	51.56	6	5	42	199	252	0	0	0	0	0	0	0	0	0	0	0	0	0	0	0	1	408	407	76.6348	47.0534	75	3.1	15.7	4.9	17.4	9.67	4.78	14.3	30.8	48.2	64.3
PA0422	74512.6	4	Euxine-Colchic broadleaf forests	PA	1192	316	36.03	43.08	41.19	42.96	0.265101	35.34	41.45	12	30	96	231	369	0	0	0	0	0	0	0	2	0	2	0	0	0	0.00865801	0.00542005	1	2825	2824	631.389	535.437	513	-7.1	16	7.1	23.5	11.47	6.7	30.6	5.9	49.5	113.5
PA0423	25583	4	Hokkaido deciduous forests	PA	296	317	142.36	144.73	43.62	45.13	1.07095	142.14	43.35	4	6	37	216	263	0	0	0	0	0	0	0	0	0	0	0	0	0	0	0	1	1785	1784	166.057	163.102	111	-9.8	17.7	-4.2	22.2	6.21	9.73	32	33.2	114.2	93.7
PA0424	434240	4	Huang He Plain mixed forests	PA	1482	913	106.22	122.69	32.07	40.26	0.616059	114.46	36.16	21	40	92	551	704	0	0	0	0	0	1	0	1	0	2	0	0.025	0	0.00181488	0.00284091	1	2680	2679	148.296	269.199	43	-7.7	18.3	2.8	28.3	13.53	10.18	36	1.6	92.7	29.6
PA0425	814.234	4	Madeira evergreen forests	PA	54	26	-16.39	-16.28	33.03	33.11	0.481481	-16.77	32.76	0	1	0	29	30	0	0	0	3	0	0	4	0	3	4	#N/A	0	#N/A	0	0.133333	3	1622	1619	665.701	388.235	641	12.1	19.6	14.4	21.2	16.05	2.73	9.1	8.6	111.7	9.4
PA0426	505287	4	Manchurian mixed forests	PA	1041	1184	121.7	135.09	46.01	53.25	1.13737	127.61	45.16	5	6	111	279	401	0	0	0	0	0	0	0	1	0	1	0	0	0	0.00358423	0.00249377	1	2083	2082	377.758	193.714	346	-33.5	15.6	-2.2	24.7	1.6	15	58.2	2.2	92.6	34
PA0427	21637.2	4	Nihonkai evergreen forests	PA	701	488	138.21	140.03	37.79	39.38	0.696148	136.79	37.16	24	14	39	241	318	2	0	2	0	7	0	0	2	4	9	0.291667	0	0	0.00829876	0.0283019	1	2258	2257	213.708	219.608	137	-4.4	21.6	3.9	26.9	12.89	8.63	31.3	41.4	165.3	148.7
PA0428	82360	4	Nihonkai montane deciduous forests	PA	529	656	139.77	141.9	42.05	42.89	1.24008	140.4	38.54	28	14	62	251	355	1	0	0	0	8	0	0	5	1	13	0.285714	0	0	0.0199203	0.0366197	1	2953	2952	518.259	415.375	421	-11.5	14.2	2.1	26.5	9.35	9.06	38	29.9	143.4	154.2
PA0429	38835.4	4	North Atlantic moist mixed forests	PA	215	227	4.81	5.22	61.77	61.9	1.05581	-8.48	54.35	5	2	36	174	217	0	0	0	0	0	0	0	0	0	0	0	0	0	0	0	1	1051	1050	144.786	117.422	115	0.6	11.1	5.8	15.2	8.06	3.66	14.6	47.4	99.5	131.1
PA0430	232909	4	Northeast China Plain deciduous forests	PA	934	1068	121.26	130.91	41.68	48.39	1.14347	124.38	43.55	14	25	85	454	578	1	2	0	0	1	2	0	0	3	3	0.0714286	0.08	0	0	0.00519031	1	1547	1546	185.445	151.575	166	-22.8	18.9	-4.2	25.1	5.75	13.95	47.9	0.9	109.2	11.6
PA0431	307716	4	Pannonian mixed forests	PA	951	668	14.03	26.37	43.98	49.95	0.702419	20.2	46.96	19	17	92	248	376	0	0	0	0	0	0	0	1	0	1	0	0	0	0.00403226	0.00265957	21	1698	1677	234.315	173.35	172	-5.8	14.5	0.8	21.8	9.87	7.93	27.6	22.3	62.1	101.4
PA0432	42460.9	4	Po Basin mixed forests	PA	489	263	13.25	13.63	45.69	46.4	0.537832	10.5	45.22	16	18	73	231	338	0	0	0	0	1	0	0	0	0	1	0.0625	0	0	0	0.00295858	1	1726	1725	75.5636	117.707	32	-0.3	19	4.3	24	12.66	7.56	24.3	31.3	71.7	103.2
PA0433	25930.1	4	Pyrenees conifer and mixed forests	PA	325	164	-1.34	2.64	42	43.48	0.504615	0.65	42.74	16	26	73	181	296	0	2	0	0	2	2	0	1	2	5	0.125	0.0769231	0	0.00552486	0.0168919	189	3153	2964	1335.91	596.668	1270	-4.1	11	5.5	21.3	7.59	5.91	25.4	41.3	84.2	83.9
PA0434	123278	4	Qin Ling Mountains deciduous forests	PA	870	260	103.86	113.32	32.29	34.62	0.298851	108.59	33.46	53	83	145	552	833	1	1	0	0	1	2	3	2	2	8	0.0188679	0.0240964	0.0206897	0.00362319	0.00960384	52	4035	3983	1225	669.436	1159	-8.9	12.5	4.6	28	11.12	8.49	36.9	1.8	103.3	15.9
PA0435	31685.3	4	Rodope montane mixed forests	PA	376	282	22.4	27.04	41.45	43.76	0.75	23.56	42.49	15	25	76	258	374	0	0	0	0	0	0	0	0	0	0	0	0	0	0	0	87	2816	2729	957.621	451.932	896	-6	11.4	2.2	22.6	8.35	7.41	28.6	24.2	54.2	59
PA0436	850317	4	Sarmatic mixed forests	PA	1590	844	53.09	58.89	60.89	61	0.530818	32.72	56.73	15	7	92	243	357	0	0	0	0	0	0	0	0	0	0	0	0	0	0	0	1	720	719	137.066	67.7679	141	-17	12	-0.4	19.9	4.73	9.59	36.9	20.9	48.6	77.3
PA0437	98008.8	4	Sichuan Basin evergreen broadleaf forests	PA	444	370	103.03	107.66	28.47	31.8	0.833333	105.34	30.14	48	61	112	585	806	0	1	0	0	1	1	2	1	1	5	0.0208333	0.0163934	0.0178571	0.0017094	0.00620347	184	1732	1548	438.266	123.629	424	5.2	24.4	8.4	29	17.27	7.34	23.8	4.9	158.6	25.8
PA0438	12562.5	4	South Sakhalin-Kurile mixed forests	PA	161	210	146.85	148.89	45.91	47.8	1.30435	147.56	44.95	5	9	41	173	228	0	0	0	0	0	0	0	0	0	0	0	0	0	0	0	1	1637	1636	224.323	182.754	190	-16.3	11	-5.4	17.4	2.61	8.99	33.7	32.9	105.3	48.3
PA0439	14724.5	4	Southern Korea evergreen forests	PA	293	148	128.49	129.48	34.7	35.61	0.505119	127.86	34.95	0	0	44	90	134	0	0	1	0	0	0	0	1	1	1	#N/A	#N/A	0	0.0111111	0.00746269	1	1824	1823	143.855	177.254	86	-1.5	23.2	4.8	27	13.34	8.81	28.5	17.8	216.8	48.7
PA0440	138266	4	Taiheiyo evergreen forests	PA	1008	642	139.74	141.96	34.67	39.25	0.636905	135.28	35.12	29	22	49	264	364	3	3	0	1	12	3	1	4	7	20	0.413793	0.136364	0.0204082	0.0151515	0.0549451	1	2500	2499	244.056	245.756	174	-3.6	21.5	8	28.8	14.35	8.06	32.4	21	158.1	139.6
PA0441	41912.9	4	Taiheiyo montane deciduous forests	PA	432	651	137.24	142.07	35.36	40.81	1.50694	140.63	37.88	26	15	48	237	326	0	0	0	0	8	0	0	5	0	13	0.307692	0	0	0.021097	0.0398773	1	3056	3055	667.578	468.047	575	-8.5	16.1	3.9	26.1	10.45	8.54	34.6	19.8	159.3	113.5
PA0442	54532.6	4	Tarim Basin deciduous forests and steppe	PA	694	384	82.64	87.71	37.99	41.38	0.553314	80.85	39.69	2	29	12	175	218	0	0	0	0	0	0	0	0	0	0	0	0	0	0	0	813	1441	628	1001.95	125.515	957	-8.3	25.1	-5.6	26.6	11.72	12.26	34.9	0	7.3	1.3
PA0443	197954	4	Ussuri broadleaf and mixed forests	PA	605	867	131.76	139.62	42.93	50.51	1.43306	135.5	46.6	9	14	67	216	306	0	0	0	0	0	0	0	0	0	0	0	0	0	0	0	1	1783	1782	366.281	285.108	305	-29.4	12.6	-10.2	21.7	1.11	13.48	51.1	5.2	107	30.5
PA0444	224488	4	Western Siberian hemiboreal forests	PA	1918	722	61.09	92	52.16	57.59	0.376434	84.01	54.88	9	6	71	209	295	0	0	0	0	0	0	0	0	0	0	0	0	0	0	0	36	735	699	148.224	80.016	126	-19.5	17.5	-14.4	20.4	0.82	13.6	39.9	12.1	61	23.4
PA0445	493836	4	Western European broadleaf forests	PA	1358	1034	0.25	18.11	42.89	52.42	0.761414	9.18	47.65	22	18	89	252	381	0	0	0	0	0	0	0	0	0	0	0	0	0	0	0	37	1923	1886	432.061	225.086	394	-5.3	13.1	5.9	21.8	8.68	6.54	27.1	22.7	53.4	106.8
PA0446	397569	4	Zagros Mountains forest steppe	PA	1488	1145	55.8	57.51	27.96	38.34	0.769489	49.47	32.96	0	0	86	294	380	0	0	1	0	0	0	1	2	1	3	#N/A	#N/A	0.0116279	0.00680272	0.00789474	16	4405	4389	1624.85	665.736	1704	-9.7	17.8	14.1	36.2	14.66	9.15	45.9	0	20.3	22.9
PA0501	149871	5	Alps conifer and mixed forests	PA	864	468	5.05	16.27	44.03	48.16	0.541667	10.66	46.09	24	19	86	241	370	0	0	3	0	3	1	0	3	3	7	0.125	0.0526316	0	0.0124481	0.0189189	22	4536	4514	1421.9	723.57	1354	-9.2	4.5	3.9	23.2	4.84	6.47	32.4	21.7	61	123.8
PA0502	142875	5	Altai montane forest and forest steppe	PA	906	481	95.17	98.47	49.58	51.7	0.530905	90.58	48.1	4	6	97	113	220	0	0	0	0	0	0	0	0	0	0	0	0	0	0	0	337	4280	3943	1979.58	650.3	2054	-26.5	8.4	-13	21.7	-1.92	12.36	48.2	0.5	20.2	27.9
PA0503	22112.4	5	Caledon conifer forests	PA	196	211	-5.6	-2.33	56.34	58.24	1.07653	-3.96	57.29	5	2	31	145	183	0	0	0	0	0	0	0	0	0	0	0	0	0	0	0	1	1326	1325	387.88	194.365	376	-1.7	10.2	3.1	13.9	6.08	4.27	15.6	42	80.5	149.6
PA0504	125335	5	Carpathian montane forests	PA	678	569	22.5	26.87	46.09	50.19	0.839233	24.87	47.66	18	13	95	211	337	1	0	1	0	1	0	0	2	2	3	0.0555556	0	0	0.00947867	0.00890208	128	2442	2314	743.71	368.139	696	-7.4	10.6	-2.8	19.3	6.35	7.82	26.7	25.1	76	66.7
PA0505	249275	5	Da Hinggan-Dzhagdy Mountains conifer forests	PA	829	865	126.64	131.98	51.34	54.53	1.04343	123.03	50.62	2	5	66	361	434	0	0	0	0	0	0	0	0	0	0	0	0	0	0	0	152	1702	1550	617.636	253.207	597	-32.6	13.9	-19.8	19.9	-4.18	17.02	52.5	2.5	99.1	5.5
PA0506	20071.1	5	East Afghan montane conifer forests	PA	183	248	70.01	70.94	34.86	35.65	1.35519	69.2	33.32	37	70	53	65	225	1	13	0	0	5	30	0	0	14	35	0.135135	0.428571	0	0	0.155556	307	5441	5134	2487.98	659.763	2441	-15.5	7.3	8.5	31.2	9.65	8.78	46.7	0.8	27.2	25.7
PA0507	63287.3	5	Elburz Range forest steppe	PA	963	296	48.36	59.13	37.68	38.93	0.307373	49.73	36.7	0	0	57	184	241	0	0	0	0	0	0	0	0	0	0	#N/A	#N/A	0	0	0	58	5587	5529	1884.33	636.839	1799	-10.1	18.7	4	30.7	10.93	9.6	40.8	0.2	23	36.6
PA0508	24704	5	Helanshan montane conifer forests	PA	157	250	105.01	106.81	37.45	39.7	1.59236	105.91	38.57	3	18	38	232	291	0	0	0	0	0	0	0	0	0	0	0	0	0	0	0	1076	3430	2354	1382.2	292.461	1329	-13	17	-6.4	24.9	8.22	11.51	37.9	0.3	39	1.5
PA0509	99290.9	5	Hengduan Mountains subalpine conifer forests	PA	441	661	97.86	102.43	26.55	32.5	1.49887	99.24	29.53	70	67	137	673	947	1	0	1	0	5	0	3	2	2	10	0.0714286	0	0.0218978	0.00297177	0.0105597	1169	5807	4638	3671.21	848.703	3791	-14.8	4.8	9.7	22.4	5.29	5.93	37.2	1.4	122.4	9.7
PA0510	45852.8	5	Hokkaido montane conifer forests	PA	338	388	141.57	145.82	45.26	45.51	1.14793	143.14	43.77	4	7	44	223	278	0	0	0	0	0	0	0	0	0	0	0	0	0	0	0	1	2119	2118	395.143	323.781	314	-15.3	12.8	-5.8	20.5	4.47	9.69	35.8	33.1	113.6	91.5
PA0511	11504.5	5	Honshu alpine conifer forests	PA	66	69	141.43	141.62	42.44	42.67	1.04545	138.58	36.72	20	14	57	195	286	0	0	0	0	3	0	0	4	0	7	0.15	0	0	0.0205128	0.0244755	1	3690	3689	911.762	522.853	826	-8.1	17.3	-1.1	24.7	7.33	9.1	32.8	20.8	151	101.4
PA0512	2901.9	5	Khangai Mountains conifer forests	PA	157	34	97.87	100	48.24	48.54	0.216561	98.93	48.39	2	1	0	161	164	0	0	0	0	0	0	0	0	0	0	0	0	#N/A	0	0	1673	2869	1196	2183.44	193.828	2174	-29.7	10.4	-25.2	12.4	-6.78	14.97	42.1	1.9	58.3	2.3
PA0513	23091.1	5	Mediterranean conifer and mixed forests	PA	198	108	8.23	9.33	36.65	37.09	0.545455	5.77	36.7	3	27	60	234	324	0	0	0	1	0	1	1	0	1	2	0	0.037037	0.0166667	0	0.00617284	1	3329	3328	1015.28	761.453	840	0.8	20.7	12.4	26.4	14.48	6.1	25.6	1.7	42.9	16.3
PA0514	46220.2	5	Northeastern Himalayan subalpine conifer forests	PA	448	287	96.27	97.59	28.64	30.87	0.640625	94.58	29.58	0	0	88	280	368	0	0	0	0	0	0	0	1	0	1	#N/A	#N/A	0	0.00357143	0.00271739	412	6923	6511	3865.85	884.988	3969	-14.4	4.2	7.9	22.7	3.94	6.34	37.1	1.4	79.1	9.2
PA0515	101410	5	Northern Anatolian conifer and deciduous forests	PA	974	302	30.26	41.76	39.14	41.84	0.310062	35.97	40.37	0	0	66	200	266	0	0	0	0	0	0	0	0	0	0	#N/A	#N/A	0	0	0	59	3703	3644	1323.31	501.838	1266	-11	12.9	3.7	22.9	8.78	7.73	33.9	2.1	50.1	59.5
PA0516	82699	5	Nujiang Langcang Gorge alpine conifer and mixed forests	PA	721	839	93.46	100.6	30.94	32.52	1.16366	98.81	28.75	0	0	169	430	599	0	0	2	0	0	0	0	4	2	4	#N/A	#N/A	0	0.00930233	0.0066778	685	6494	5809	3672.57	959.593	3820	-14.3	5.9	8	20.3	5.08	6.02	34.6	2.5	115.8	19
PA0517	16653.1	5	Qilian Mountains conifer forests	PA	213	200	103.77	104.3	38.51	38.72	0.938967	103.14	34.59	11	26	48	485	570	0	0	0	0	0	0	2	1	0	3	0	0	0.0416667	0.00206186	0.00526316	1388	4712	3324	3236.9	490.65	3247	-19.2	6.5	-6	15.2	0.5	8.14	34.4	0.5	65.9	2.7
PA0518	80133.7	5	Qionglai-Minshan conifer forests	PA	341	715	103.5	104.6	33.11	33.87	2.09677	102.04	30.66	56	62	155	653	926	0	1	1	1	2	1	7	1	3	11	0.0357143	0.016129	0.0451613	0.00153139	0.011879	286	5750	5464	2595.02	1098.12	2603	-11	6.8	6.4	25.9	7.86	6.47	36.9	2	103.6	18.9
PA0519	358833	5	Sayan montane conifer forests	PA	1478	749	101.01	106.67	53.65	56.19	0.506766	95.45	52.92	7	6	92	300	405	0	0	0	0	0	0	0	0	0	0	0	0	0	0	0	110	3261	3151	1248.8	574.643	1249	-33.8	7.6	-14.6	20.2	-3.66	14.36	54	1.1	54.6	42.1
PA0520	19401.4	5	Scandinavian coastal conifer forests	PA	81	127	18.85	19	69.62	69.7	1.5679	5.64	60.54	4	4	38	188	234	0	0	0	0	0	0	0	0	0	0	0	0	0	0	0	1	1360	1359	232.265	220.345	177	-7.8	9.5	1.7	14	4.6	5.32	21.8	47.2	127.1	135.3
PA0521	27567.8	5	Tian Shan montane conifer forests	PA	298	153	94.07	94.29	43.87	44.23	0.513423	72.26	42.71	5	22	57	370	454	0	0	0	0	0	0	0	1	0	1	0	0	0	0.0027027	0.00220264	562	4625	4063	2427.44	829.256	2420	-25.7	7.2	-8	24.9	0.89	11.37	50.6	1.5	24.9	38
PA0601	3.92255e+06	6	East Siberian taiga	PA	2950	2267	131.9	142.57	55.23	71.42	0.768475	114.46	61.38	7	6	71	268	352	0	0	0	0	0	0	0	0	0	0	0	0	0	0	0	1	2728	2727	458.054	284.266	392	-46.5	8.2	-16.9	19.5	-8.66	18.04	66	1.9	33.5	32.1
PA0602	92077.4	6	Iceland boreal birch forests and alpine tundra	PA	513	353	-13.54	-13.5	66.53	66.56	0.688109	-19.02	64.93	0	1	4	70	75	0	0	0	0	0	0	0	0	0	0	#N/A	0	0	0	0	1	1971	1970	446.159	299.611	439	-8.2	4.7	0.2	11.4	1.1	4.68	19.6	26.3	63.7	123.8
PA0603	147064	6	Kamchatka-Kurile meadows and sparse forests	PA	424	868	167.42	168.04	59.8	60.37	2.04717	158.75	52.97	1	0	28	152	181	0	0	0	0	0	0	0	0	0	0	0	#N/A	0	0	0	1	3314	3313	278.531	305.197	167	-20.9	6.3	-3.8	13.3	-1.58	9.21	34.2	11.9	61.4	81.9
PA0604	15293.7	6	Kamchatka-Kurile taiga	PA	184	275	158.94	161.87	54.86	57.34	1.49457	160.41	56.1	1	0	22	105	128	0	0	0	0	0	0	0	0	0	0	0	#N/A	0	0	0	3	4263	4260	352.345	508.124	162	-26	0.6	-13	14.6	-2.24	10.6	40.6	27.7	72.7	56
PA0605	1.13326e+06	6	Northeast Siberian taiga	PA	1962	1382	150.41	169.92	59	70.4	0.704383	147.46	64.6	3	0	38	160	201	0	0	0	0	0	0	0	0	0	0	0	#N/A	0	0	0	1	2501	2500	496.442	385.106	422	-50.6	3.4	-17.4	17.1	-13.72	19.21	67.7	4.7	28.9	28.1
PA0606	403504	6	Okhotsk-Manchurian taiga	PA	723	1442	137.26	141.6	54.9	58.44	1.99447	136.2	51.99	7	7	52	213	279	0	0	0	0	0	0	0	0	0	0	0	0	0	0	0	1	2107	2106	501.113	339.074	460	-36.8	8.3	-14.9	20.2	-3.71	15.63	57	4.5	76.3	28
PA0607	68943.7	6	Sakhalin Island taiga	PA	222	938	141.66	144.79	46.03	54.47	4.22523	143.22	50.25	4	1	32	164	201	0	0	0	0	0	0	0	0	0	0	0	0	0	0	0	1	1483	1482	196.039	207.604	112	-21.5	11.3	-11.5	16.8	-0.64	12.04	38.3	18.3	77.3	57.1
PA0608	2.17029e+06	6	Scandinavian and Russian taiga	PA	2903	1480	52.66	62.55	67.15	69.98	0.509817	34.91	63.17	11	6	79	270	366	0	0	0	0	0	0	0	0	0	0	0	0	0	0	0	1	1600	1599	180.234	131.038	152	-24.6	8.1	-0.9	19.3	0.84	10.43	43.9	13.8	50.7	108.6
PA0609	201186	6	Trans-Baikal conifer forests	PA	757	806	112.05	114.57	48.87	55.34	1.06473	109.11	51.72	5	6	65	244	320	0	0	0	0	0	0	0	0	0	0	0	0	0	0	0	403	2599	2196	1151.72	350.171	1116	-30.2	9.5	-20.4	18.9	-3.51	14.62	49.1	1.7	73.1	19.4
PA0610	175548	6	Ural montane forests and tundra	PA	425	1543	53.89	62.38	51.89	65.7	3.63059	58.13	58.8	10	7	62	218	297	0	0	0	0	0	0	0	0	0	0	0	0	0	0	0	76	1655	1579	382.505	184.768	344	-26.4	10.2	-15.1	20.2	-0.82	12.49	46.6	18.5	51.5	32
PA0611	1.68024e+06	6	West Siberian taiga	PA	2141	1441	58.97	93.47	54.38	68.33	0.67305	76.22	61.35	8	5	72	226	311	0	0	0	0	0	0	0	0	0	0	0	0	0	0	0	1	1418	1417	94.431	58.8092	86	-28.2	12.7	-14.6	19.6	-2.73	13.99	47.8	13.4	50.5	27.7
PA0801	127683	8	Alai-Western Tian Shan steppe	PA	640	760	65.06	72.64	37.74	44.62	1.1875	68.85	41.18	2	42	70	247	361	0	0	0	0	0	0	0	0	0	0	0	0	0	0	0	153	2415	2262	475.34	271.4	398	-10.6	21.2	3.9	30.2	13.83	10.01	40.8	0	24.8	8.2
PA0802	83191.9	8	Altai steppe and semi-desert	PA	538	398	79.98	87.31	46.73	50.31	0.739777	81.88	48.52	5	12	90	133	240	0	0	0	0	0	0	0	1	0	1	0	0	0	0.0075188	0.00416667	195	3408	3213	824.974	376.433	753	-20.8	11.4	-12.8	23.5	1.91	13.7	44.3	6.6	21.8	30.8
PA0803	24934.2	8	Central Anatolian steppe	PA	183	233	33.97	34.81	39.97	40.25	1.27322	33.76	39.11	0	0	6	192	198	0	0	0	0	0	0	0	0	0	0	#N/A	#N/A	0	0	0	575	1518	943	936.762	102.508	941	-1	20.8	1	23.2	11.36	7.91	24.2	3.1	39.6	12.4
PA0804	209634	8	Daurian forest steppe	PA	1127	641	104.44	120.05	47.18	53.18	0.568767	114.29	50.18	4	6	63	150	223	0	0	0	0	0	0	0	0	0	0	0	0	0	0	0	446	2280	1834	964.88	299.832	887	-31.6	13.3	-20	20.4	-2.22	15.41	52	1.1	69.1	5.7
PA0805	168382	8	Eastern Anatolian montane steppe	PA	719	629	45.59	48.78	37.71	41.73	0.874826	44.68	38.89	9	42	107	299	457	0	0	0	1	0	0	1	2	1	3	0	0	0.00934579	0.00668896	0.00656455	274	4938	4664	1808.39	492.117	1785	-12.8	13.6	1.5	28.6	8	9.84	41.4	0.6	34.7	65.3
PA0806	65134.5	8	Emin Valley steppe	PA	514	295	80.18	86.93	44.95	47.59	0.57393	83.56	46.27	6	24	65	311	406	0	0	0	0	0	0	0	0	0	0	0	0	0	0	0	229	3186	2957	930.242	567.767	787	-20.9	12.2	-11	28.7	4.71	13.47	49.6	1.8	17.3	24.2
PA0807	1456.79	8	Faroe Islands boreal grasslands	PA	28	40	-6.4	-6.26	62.28	62.39	1.42857	-6.88	61.89	0	1	3	42	46	0	0	0	0	0	0	0	0	0	0	#N/A	0	0	0	0	1	882	881	181.514	128.702	155	2.1	9.6	3.2	10.7	5.85	2.89	8.6	71.4	185.8	83.3
PA0808	168156	8	Gissaro-Alai open woodlands	PA	673	784	66.62	74.44	36.73	43.78	1.16493	70.53	40.25	5	44	84	243	376	0	0	0	0	0	0	0	1	0	1	0	0	0	0.00411523	0.00265957	280	5245	4965	1717.65	937.091	1533	-16.5	9.7	3.5	30.8	8.26	9.67	47.3	0	28.3	20.1
PA0809	422308	8	Kazakh forest steppe	PA	2074	792	57.69	87.76	49.94	56.56	0.381871	59.91	53.25	10	9	98	243	360	0	0	0	0	0	0	0	0	0	0	0	0	0	0	0	46	2885	2839	250.046	270.088	161	-19.5	11.2	-13.7	22.2	1.61	13.66	41.7	8.2	35.2	36.1
PA0810	807557	8	Kazakh steppe	PA	2260	829	51.15	83.78	47.81	55.42	0.366814	67.47	51.61	9	16	85	208	318	0	0	0	0	0	0	0	0	0	0	0	0	0	0	0	-3	1240	1243	254.522	153.334	221	-18.5	18.2	-10.8	25.1	3.03	14.05	43.6	9.1	19.4	35.5
PA0811	72199.5	8	Kazakh upland	PA	413	254	77.77	79.86	52.19	53.65	0.615012	75.75	48.47	3	9	57	164	233	0	0	0	0	0	0	0	0	0	0	0	0	0	0	0	131	1484	1353	649.055	261.226	737	-18.3	18.3	-14.3	22	1.94	13.74	40.3	4.9	21	16.5
PA0812	132288	8	Middle East steppe	PA	971	824	35.22	45.77	29.76	37.01	0.84861	36.25	33.38	0	0	65	264	329	0	0	0	0	0	0	0	1	0	1	#N/A	#N/A	0	0.00378788	0.00303951	-405	1741	2146	467.814	236.604	385	3.2	22.9	12.2	35	18.61	8.77	31.8	0	10.4	2.2
PA0813	889460	8	Mongolian-Manchurian grassland	PA	1890	1451	101.95	127.23	38.67	51.64	0.767725	114.59	45.15	10	19	98	458	585	0	0	0	0	0	0	1	0	0	1	0	0	0.0102041	0	0.0017094	88	2693	2605	935.508	409.7	969	-28.9	13.7	-8.8	24.1	1.32	14.5	53	0.8	47.7	6.1
PA0814	997073	8	Pontic steppe	PA	2362	1493	32.62	58.6	46.54	54.87	0.632091	42.67	48.37	17	48	134	305	504	0	0	2	0	0	0	0	4	2	4	0	0	0	0.0131148	0.00793651	-35	2629	2664	120.01	127.268	101	-16.3	17.7	1.6	25.7	8.11	11.03	42	9.7	21.6	59.3
PA0815	34057	8	Sayan Intermontane steppe	PA	530	157	90.65	98.24	51.07	52.02	0.296226	95.62	50.87	1	5	55	233	294	0	0	0	0	0	0	0	0	0	0	0	0	0	0	0	493	2760	2267	1254.78	426.362	1202	-32.8	10	-20.7	19.2	-4.16	16.39	52	3.5	71.5	30.8
PA0816	228369	8	Selenge-Orkhon forest steppe	PA	1071	784	95.6	110.83	49.2	52.73	0.732026	101.78	49.29	4	8	57	261	330	0	0	0	0	0	0	0	0	0	0	0	0	0	0	0	480	3494	3014	1668.14	506.118	1717	-33.3	7.5	-14.6	19.4	-3.49	14.13	52.7	0.7	36.8	11.3
PA0817	162600	8	South Siberian forest steppe	PA	788	497	102.05	105.43	54.47	57.02	0.630711	90.2	54.82	6	5	67	215	293	0	0	0	0	0	0	0	0	0	0	0	0	0	0	0	50	1767	1717	376.753	166.16	353	-24.3	15.4	-15.9	19.8	-0.03	13.77	44.1	6.8	61.6	38.8
PA0818	129231	8	Tian Shan foothill arid steppe	PA	897	578	71.02	82.1	40.83	46.13	0.64437	79.41	43.48	5	32	89	366	492	0	0	0	0	0	0	0	0	0	0	0	0	0	0	0	356	4244	3888	1639.72	850.861	1531	-22.9	7.4	-4.4	25.5	4.75	11.21	48.4	1.1	26.7	43.4
PA0901	123622	9	Amur meadow steppe	PA	490	345	129.42	135.98	48.82	51.92	0.704082	132.7	47.65	6	5	71	221	303	0	0	0	0	0	0	0	0	0	0	0	0	0	0	0	17	888	871	125.552	82.3791	93	-28.5	19.7	-18.2	22.3	1.05	16.19	50.8	3.2	113.2	11.4
PA0902	11564.9	9	Bohai Sea saline meadow	PA	204	220	117.63	119.81	39.04	39.43	1.07843	118.65	37.86	9	21	14	369	413	0	0	0	0	0	0	0	0	0	0	0	0	0	0	0	1	95	94	10.0524	7.98531	8	-5.4	25.1	-2.5	26.5	12.23	10.91	31.9	3.5	183.3	7.9
PA0903	23259.8	9	Nenjiang River grassland	PA	189	270	123.64	125.3	45.47	47.89	1.42857	124.06	46.32	7	10	40	340	397	0	0	0	0	0	0	0	0	0	0	0	0	0	0	0	94	284	190	139.669	18.4593	135	-19.2	22.2	-15.5	23.9	4.25	15.01	43.1	1	127.4	1.7
PA0904	50952.5	9	Nile Delta flooded savanna	PA	298	895	32.31	33.08	31.53	31.6	3.00336	30.89	27.57	7	42	56	217	322	0	0	0	0	0	0	0	1	0	1	0	0	0	0.00460829	0.00310559	-5	685	690	69.4251	84.8664	30	11.7	26.1	16.1	33.3	22.1	5.79	21.6	0	0	0.4
PA0905	53853.7	9	Saharan halophytics	PA	272	180	26.31	29.13	35.79	35.96	0.661765	27.72	29.59	4	30	65	139	238	0	0	0	0	0	1	0	0	0	1	0	0.0333333	0	0	0.00420168	-174	601	775	22.9889	109.124	1	10.3	26.7	21.9	37.4	22.09	6.33	27.1	0	1.1	9.9
PA0906	35572.8	9	Tigris-Euphrates alluvial salt marsh	PA	289	290	48.47	49.55	32.49	33.13	1.00346	46.88	31.83	0	0	39	240	279	0	0	0	0	0	0	1	0	0	1	#N/A	#N/A	0.025641	0	0.00358423	1	177	176	11.5116	11.0346	9	10.2	35.3	12.9	36.6	24.49	8.97	26.4	0	20	0
PA0907	33836.4	9	Suiphun-Khanka meadows and forest meadows	PA	278	346	130.68	134.26	43.26	46.36	1.2446	132.47	44.81	9	12	117	214	352	0	0	0	0	0	0	0	0	0	0	0	0	0	0	0	1	574	573	99.8949	61.1684	76	-19.8	20.1	-12.1	21.9	4.04	13.88	41.7	4	119.4	13.7
PA0908	5319.73	9	Yellow Sea saline meadow	PA	129	217	119.5	120.91	32.69	34.64	1.68217	120.39	33.66	12	15	16	323	366	0	0	0	0	0	0	0	1	0	1	0	0	0	0.00309598	0.00273224	1	75	74	9.0086	8.97035	5	0.4	26.5	2.2	27.2	14.24	9.38	26.8	14	224.5	24
PA1001	90434.4	10	Altai alpine meadow and tundra	PA	446	208	91.22	93.44	49.31	50.59	0.466368	86.61	49.65	0	11	84	125	220	0	0	0	0	0	0	0	1	0	1	#N/A	0	0	0.008	0.00454545	378	4205	3827	2295.54	589.817	2352	-25.6	6.6	-14.5	20.2	-3.45	11.9	45.8	1	26.8	25.3
PA1002	629190	10	Central Tibetan Plateau alpine steppe	PA	2049	1036	84.99	101.75	34.43	38.31	0.505612	89.81	33.75	0	1	60	168	229	0	0	0	0	0	0	0	0	0	0	#N/A	0	0	0	0	2402	6683	4281	4793.9	595.971	4906	-22.4	1.9	-8.4	17.8	-3.58	8.85	40.2	0.1	8.3	11.9
PA1003	121014	10	Eastern Himalayan alpine shrub and meadows	PA	659	283	96.75	98.3	29.09	30.01	0.429439	90.99	28.59	6	16	116	347	485	1	1	0	0	2	5	1	2	2	10	0.333333	0.3125	0.00862069	0.00576369	0.0206186	1091	7529	6438	4535.31	779.633	4672	-15.1	2.9	8	21.6	0.71	6.47	36.7	0.2	41.9	22.8
PA1004	66482	10	Ghorat-Hazarajat alpine meadow	PA	605	340	69.32	69.5	34.74	35.7	0.561983	65.95	34.07	0	0	41	103	144	0	0	0	0	0	0	0	0	0	0	#N/A	#N/A	0	0	0	1254	4975	3721	2970.21	535.769	2997	-16.2	6.7	0.1	25.6	5.04	8.55	41.8	0	55.3	9.3
PA1005	28268.5	10	Hindu Kush alpine meadow	PA	174	221	70.42	71.48	36.67	38.3	1.27011	70.3	35.86	0	0	45	124	169	0	0	0	0	0	0	0	0	0	0	#N/A	#N/A	0	0	0	1072	6516	5444	3618.14	862.504	3690	-18.3	4.8	3.6	26.6	1.26	8.47	44.9	1.3	93.9	33.2
PA1006	143265	10	Karakoram-West Tibetan Plateau alpine steppe	PA	854	658	72.68	80.64	36.88	37.4	0.770492	75.95	34.4	0	0	66	93	159	0	0	1	0	0	0	0	4	1	4	#N/A	#N/A	0	0.0430108	0.0251572	1181	7861	6680	4497.12	796.536	4599	-23	2.8	-2.4	21.7	-1.71	8.73	44.7	0.9	12.1	32.3
PA1007	37167.8	10	Khangai Mountains alpine meadow	PA	386	271	97.08	102.19	48.04	48.49	0.702073	100.46	47.29	0	0	0	162	162	0	0	0	0	0	0	0	0	0	0	#N/A	#N/A	#N/A	0	0	1812	3793	1981	2564.88	291.838	2566	-29	7.4	-17.5	13.1	-6.62	13.27	42.1	1.2	47.3	3.4
PA1008	58318.6	10	Kopet Dag woodlands and forest steppe	PA	581	394	54.94	61.53	39.52	40.08	0.678141	57.85	37.92	3	50	69	207	329	0	0	0	0	0	0	0	0	0	0	0	0	0	0	0	7	3091	3084	784.226	606.309	555	-6.9	19.5	4.9	31.6	14.26	9.91	38.5	0	21.5	6.3
PA1009	126224	10	Kuh Rud and Eastern Iran montane woodlands	PA	744	700	60.96	63.8	35.44	35.96	0.94086	53.96	31.45	0	0	38	128	166	0	0	0	0	0	0	1	0	0	1	#N/A	#N/A	0.0263158	0	0.0060241	532	4468	3936	1793.19	522.765	1749	-3.4	19.1	14.1	33.5	15.84	8.45	36.9	0	15.5	12.3
PA1010	6327.65	10	Mediterranean High Atlas juniper steppe	PA	126	92	-3.99	-3.78	33.66	33.73	0.730159	-6.17	31.72	4	27	36	125	192	0	1	0	0	0	4	0	0	1	4	0	0.148148	0	0	0.0208333	1487	4057	2570	2704.47	371.334	2708	0.1	18.7	4.1	22.8	9.94	7.1	22.7	10.7	77.1	19.7
PA1011	374494	10	North Tibetan Plateau-Kunlun Mountains alpine desert	PA	1619	545	75.77	93.87	33.98	38.8	0.336628	84.82	36.39	0	0	43	85	128	0	0	1	0	0	0	0	1	1	1	#N/A	#N/A	0	0.0117647	0.0078125	1508	6619	5111	4692.46	718.219	4928	-24.2	1.2	-6.8	23.3	-5.09	9.76	47.5	0.1	5.4	7
PA1012	49389.8	10	Northwestern Himalayan alpine shrub and meadows	PA	295	226	76.17	78.77	35.61	36.21	0.766102	73.55	34.57	10	5	71	139	225	0	1	0	0	2	3	0	0	1	5	0.2	0.6	0	0	0.0222222	1021	6572	5551	4095.15	930.56	4156	-17.2	4.4	2.5	24.5	1.56	7.76	41.7	2.8	28.9	42.8
PA1013	215604	10	Ordos Plateau steppe	PA	683	633	104.3	112.15	34.91	40.65	0.926794	108.22	37.78	12	27	91	402	532	0	0	0	0	0	0	1	0	0	1	0	0	0.010989	0	0.0018797	682	2881	2199	1414.53	275.7	1363	-12.5	15.9	-4.2	24.3	7.38	10.98	36.8	0.3	45.2	4.6
PA1014	118025	10	Pamir alpine desert and tundra	PA	772	381	75.6	76.74	38.84	40.13	0.493523	74.58	38.4	2	9	49	164	224	1	0	0	0	1	0	1	1	1	3	0.5	0	0.0204082	0.00609756	0.0133929	1210	7321	6111	4033.32	740.563	4123	-23.6	3.7	-7.2	23.3	-2.61	9.68	46.9	1	11.5	21.1
PA1015	73285.5	10	Qilian Mountains subalpine meadows	PA	562	343	94.95	101.43	36.86	39.93	0.61032	98.19	38.4	0	0	64	104	168	0	0	0	0	0	0	0	0	0	0	#N/A	#N/A	0	0	0	1982	5713	3731	3873.72	542.075	3968	-22.1	3.7	-11.5	19.2	-4.23	9.78	41.3	0.4	17.7	1.8
PA1016	81212.7	10	Sayan Alpine meadows and tundra	PA	364	335	100.07	103.51	52.39	54.55	0.92033	89.52	50.94	2	6	67	292	367	0	0	0	0	0	0	0	0	0	0	0	0	0	0	0	434	3821	3387	1895.67	494.494	1943	-34.2	6.8	-16.6	17	-6.86	14.2	51.2	1	41.6	26.2
PA1017	460542	10	Southeast Tibet shrublands and meadows	PA	1032	861	100.69	105.24	34.4	38.27	0.834302	97.92	33.06	0	0	158	412	570	0	0	1	0	0	0	2	4	1	6	#N/A	#N/A	0.0126582	0.00970874	0.0105263	1200	7213	6013	4078.37	817.348	4262	-19.3	3.4	1	21.4	-0.16	7.52	40.7	0.6	52	7.6
PA1018	23849.6	10	Sulaiman Range alpine meadows	PA	263	118	69.9	71.29	33.56	34.13	0.448669	67.77	31.12	0	2	66	0	68	0	0	0	0	0	0	0	1	0	1	#N/A	0	0	#N/A	0.0147059	794	4603	3809	2209.39	382.634	2190	-6	16.7	7.3	28.9	13.05	8.35	34.9	0.1	25.6	27.8
PA1019	280611	10	Tian Shan montane steppe and meadows	PA	1536	782	91.86	95.17	42.89	45.77	0.509115	82.12	42.16	6	23	103	386	518	0	0	1	0	0	0	0	2	1	2	0	0	0	0.00518135	0.003861	174	7456	7282	2745.93	1010.27	2909	-29.2	-0.4	-7	26.9	-1.04	11.53	56.1	0.2	10.8	45.9
PA1020	271999	10	Tibetan Plateau alpine shrublands and meadows	PA	1396	825	87.74	102.9	29.3	36.46	0.590974	93.22	32.88	0	0	66	189	255	0	0	0	0	0	0	0	0	0	0	#N/A	#N/A	0	0	0	1823	6276	4453	4560.11	593.365	4671	-19.1	3.7	-7.1	16.9	-3.01	8.36	36	0.6	46.1	4.5
PA1021	70090.4	10	Western Himalayan alpine shrub and Meadows	PA	583	438	83.6	84.06	29.26	32.44	0.751286	81.02	30.47	2	11	54	344	411	0	1	0	0	0	2	9	0	1	11	0	0.181818	0.166667	0	0.026764	1395	8081	6686	4652.81	646.339	4698	-17.5	4.4	1.3	17.1	-0.86	7.7	34.6	2.3	21.9	18.4
PA1022	59380.7	10	Yarlung Tsangpo arid steppe	PA	708	246	90.25	92.94	29.69	30.2	0.347458	89.29	28.97	0	0	30	216	246	0	0	0	0	0	0	0	0	0	0	#N/A	#N/A	0	0	0	3103	6244	3141	4534.94	441.53	4556	-14.2	5.4	-3.7	14.5	0.99	6.97	28.7	0	40.2	11.5
PA1101	162810	11	Arctic desert	PA	389	435	106.56	107.86	81.72	81.9	1.11825	58.76	75.17	0	0	5	45	50	0	0	0	0	0	0	0	0	0	0	#N/A	#N/A	0	0	0	1	2104	2103	338.89	251.483	300	-35.3	-2.8	-7.6	6.8	-12.5	9.87	42.1	3.7	18.9	60.4
PA1102	477269	11	Bering tundra	PA	1209	880	156.27	180	65.07	67.54	0.727874	168.14	63.67	1	0	35	131	167	0	0	0	0	0	0	0	0	0	0	0	#N/A	0	0	0	1	2295	2294	323.331	269.52	261	-34.3	6.1	-13.7	14.1	-8.83	13.9	48.4	10.4	43	34.5
PA1103	560461	11	Cherskii-Kolyma mountain tundra	PA	866	878	157.61	170.18	69.54	71.73	1.01386	148.25	65.43	1	0	35	148	184	0	0	0	0	0	0	0	0	0	0	0	#N/A	0	0	0	1	2822	2821	859.467	447.816	844	-51.6	3.9	-21.7	16	-16.09	19.87	67.6	4.9	32.3	19.5
PA1104	300485	11	Chukchi Peninsula tundra	PA	755	523	167.82	180	69.55	70.13	0.692715	171.02	67.76	1	0	21	106	128	0	0	0	0	0	0	0	0	0	0	0	#N/A	0	0	0	1	1706	1705	363.686	273.552	318	-36.5	1.5	-16	13	-11.94	13.42	49.5	4.8	24	23
PA1105	119889	11	Kamchatka Mountain tundra and forest tundra	PA	446	823	161.32	164.63	56.46	61.14	1.84529	160.89	57.43	1	0	26	118	145	0	0	0	0	0	0	0	0	0	0	0	#N/A	0	0	0	1	4588	4587	554.132	384.582	487	-27.7	-1.5	-6.2	14.1	-4.03	10.16	41.8	14.4	55.3	69.4
PA1106	59185.4	11	Kola Peninsula tundra	PA	483	411	40.45	41.36	70.15	70.92	0.850932	34.95	68.6	1	1	24	120	146	0	0	0	0	0	0	0	0	0	0	0	0	0	0	0	1	1115	1114	206.702	81.9762	213	-13.8	8.5	-6.3	13.4	-0.89	8.26	27.2	17.5	54	40.3
PA1107	224278	11	Northeast Siberian coastal tundra	PA	1191	421	161.41	161.85	71.43	72.92	0.353484	146.06	70.75	2	0	25	70	97	0	0	0	0	0	0	0	0	0	0	0	#N/A	0	0	0	1	878	877	31.0691	42.2192	18	-43	3.8	-30.7	12.2	-14.26	17.17	55.2	3.6	25.4	8.8
PA1108	286282	11	Northwest Russian-Novaya Zemlya tundra	PA	1018	705	59.82	68.17	73.63	74	0.692534	55.75	67.29	2	3	24	136	165	0	0	0	0	0	0	0	0	0	0	0	0	0	0	0	1	1775	1774	147.057	166.14	103	-28	3.7	-11.1	16.3	-5.6	11.37	44.3	12.7	44.3	34.1
PA1109	37247.3	11	Novosibirsk Islands arctic desert	PA	239	176	148.49	150.89	76.64	76.79	0.736402	143.14	74.99	0	0	8	27	35	0	0	0	0	0	0	0	0	0	0	#N/A	#N/A	0	0	0	1	360	359	36.0544	37.951	25	-35.6	1.1	-31.1	5.9	-15.66	13.8	41.5	3.3	19.5	7.9
PA1110	244865	11	Scandinavian Montane Birch forest and grasslands	PA	803	747	27.08	30.78	71.05	71.21	0.930262	18.44	67.84	4	2	47	208	261	0	0	0	0	0	0	0	0	0	0	0	0	0	0	0	1	2292	2291	699.564	376.905	684	-17.7	5.5	1.1	13.8	-0.65	7.43	31.5	15.4	47.9	124
PA1111	962154	11	Taimyr-Central Siberian tundra	PA	1702	1423	129.06	130.34	77.22	77.76	0.836075	104.72	71.26	1	0	30	93	124	0	0	0	0	0	0	0	0	0	0	0	#N/A	0	0	0	1	1646	1645	215.558	263.106	100	-42.8	1.1	-26.6	15.2	-13.74	16.03	58	7.9	21.8	33.9
PA1112	218608	11	Trans-Baikal Bald Mountain tundra	PA	485	328	139.83	140.66	59.23	59.8	0.676289	112.03	55.03	2	2	45	198	247	0	0	0	0	0	0	0	0	0	0	0	0	0	0	0	207	2825	2618	1181.64	371.092	1145	-39.9	7.9	-23.6	18.1	-9.13	17.14	58	2	64.6	17.3
PA1113	7599.86	11	Wrangel Island arctic desert	PA	92	82	178.62	180	70.9	71.58	0.891304	-178.72	71.24	0	0	5	24	29	0	0	0	0	0	0	0	0	0	0	#N/A	#N/A	0	0	0	1	1009	1008	158.637	147.349	126	-29.6	1.3	-25.6	3.9	-12.76	11.53	33.5	6.5	29.4	10.8
PA1114	415131	11	Yamal-Gydan tundra	PA	604	816	78.63	86.35	73.45	73.58	1.35099	75.81	69.56	3	1	26	82	112	0	0	0	0	0	0	0	0	0	0	0	0	0	0	0	1	409	408	36.1808	27.1232	31	-28.7	5.4	-24.3	15.6	-9.52	13.62	44.3	8.6	33.7	32.7
PA1201	133558	12	Aegean and Western Turkey sclerophyllous and mixed forests	PA	573	463	29.54	30.53	40.75	41.77	0.808028	22.43	39.71	16	41	90	272	419	1	4	0	0	1	6	0	1	5	8	0.0625	0.146341	0	0.00367647	0.0190931	1	2710	2709	347.548	329.722	245	-1	18.3	11.5	27.3	14.68	6.69	28.3	0.8	57.4	51.6
PA1202	86392.7	12	Anatolian conifer and deciduous mixed forests	PA	498	414	28.78	32.02	40.58	40.75	0.831325	30.11	38.69	0	0	64	247	311	0	0	0	0	0	0	0	0	0	0	#N/A	#N/A	0	0	0	1	2458	2457	833.32	422.077	899	-1.6	15.5	7.6	25.8	11.96	7.11	27.4	5.4	42.7	39.7
PA1203	4966.86	12	Canary Islands dry woodlands and forests	PA	78	66	-15.42	-15.36	28.44	28.85	0.846154	-16.77	28.25	2	10	10	103	125	0	4	0	3	1	7	8	2	7	18	0.5	0.7	0.8	0.0194175	0.144	1	3701	3700	702.021	568.296	576	6.2	18.2	16.7	23.3	16.85	2.87	17.1	0.2	32.4	3.6
PA1204	3633.65	12	Corsican montane broadleaf and mixed forests	PA	57	114	8.65	9.34	41.54	42.56	2	9	42.05	7	10	34	130	181	1	0	0	0	3	3	1	0	1	7	0.428571	0.3	0.0294118	0	0.038674	19	2463	2444	939.579	462.76	873	1.7	16.4	7.7	21.4	11.2	5.35	19.7	15.7	99.4	31.9
PA1205	8192.5	12	Crete Mediterranean forests	PA	255	82	26.16	26.32	35.6	35.65	0.321569	24.92	35.29	5	15	32	116	168	1	0	0	0	1	0	0	2	1	3	0.2	0	0	0.0172414	0.0178571	1	2429	2428	516.151	429.255	402	4.9	19.8	11.9	25.3	16.1	5.26	20.4	0.5	127.7	8
PA1206	9272.64	12	Cyprus Mediterranean forests	PA	211	127	32.27	34.6	34.56	35.7	0.601896	33.44	35.13	3	19	20	140	182	0	4	0	0	1	8	0	0	4	9	0.333333	0.421053	0	0	0.0494505	1	1971	1970	305.461	303.99	202	5.3	23.4	11.6	28.2	18.06	6.24	22.9	0.3	79.1	7.5
PA1207	143853	12	Eastern Mediterranean conifer-sclerophyllous-broadleaf forests	PA	764	796	41.44	42.68	36.65	38.43	1.04188	36.54	34.86	0	0	121	337	458	0	0	2	1	0	0	1	4	3	5	#N/A	#N/A	0.00826446	0.0118694	0.010917	-405	2443	2848	525.766	328.563	492	0.5	19.6	12.9	33.4	17.32	7.93	32.9	0	8.2	17.9
PA1208	34460.9	12	Iberian conifer forests	PA	261	249	-1.31	-0.09	40.33	42	0.954023	-2.99	40.88	11	28	60	194	293	0	1	0	0	1	1	0	1	1	3	0.0909091	0.0357143	0	0.00515464	0.0102389	220	3450	3230	1220.11	301.242	1163	-1.2	17.6	7.6	24.1	10.63	6.59	25.3	11.4	48.7	40
PA1209	297956	12	Iberian sclerophyllous and semi-deciduous forests	PA	875	704	-8.36	2.04	36.57	42.9	0.804571	-3.16	39.73	16	32	65	229	342	0	0	0	0	1	1	0	1	0	3	0.0625	0.03125	0	0.00436681	0.00877193	1	2127	2126	631.811	285.278	645	0	17	11.4	27.3	13.83	6.43	27.3	1.5	30.8	65.6
PA1210	40638.9	12	Illyrian deciduous forests	PA	618	769	13.37	21.08	39.15	45.98	1.24434	18.7	42.56	20	35	78	255	388	1	0	0	0	3	3	0	3	1	9	0.15	0.0857143	0	0.0117647	0.0231959	1	2238	2237	396.654	339.995	314	-1.3	17.5	8.4	25.5	12.66	6.69	26.8	9.5	105.8	135.4
PA1211	102225	12	Italian sclerophyllous and semi-deciduous forests	PA	824	556	6.87	16.85	40.08	45.11	0.674757	11.86	42.59	22	25	72	242	361	1	0	0	0	3	0	0	1	1	4	0.136364	0	0	0.00413223	0.0110803	1	2088	2087	358.011	270.24	296	0	15.8	9.3	25.2	13.01	6.41	25.2	13.4	51.4	67.4
PA1212	99975	12	Mediterranean acacia-argania dry woodlands and succulent thickets	PA	704	658	-9.79	-6.21	31.49	33	0.934659	-8.68	30.01	7	46	75	249	377	0	3	2	1	1	10	6	3	6	20	0.142857	0.217391	0.08	0.0120482	0.0530504	1	2736	2735	576.743	445.391	455	5.4	20	17.3	28.4	18.07	4.38	23	0	9.2	8.6
PA1213	292082	12	Mediterranean dry woodlands and steppe	PA	1686	569	29.11	30.97	31.24	36.03	0.337485	1.66	33.33	5	58	80	262	405	0	0	0	0	0	3	0	0	0	3	0	0.0517241	0	0	0.00740741	-21	2446	2467	846.499	450.407	973	3.7	23.7	13.7	32.6	17.21	7.11	28.9	0	9.8	14.9
PA1214	358243	12	Mediterranean woodlands and forests	PA	1862	907	19.94	22.32	37.51	37.54	0.487111	-5.83	33.74	4	65	90	301	460	0	3	0	0	0	14	0	1	3	15	0	0.215385	0	0.00332226	0.0326087	-2	3246	3248	690.066	552.647	593	0.8	18.7	13.4	29.5	16.38	6.15	28.7	0	19.4	20.4
PA1215	90850.9	12	Northeastern Spain and Southern France Mediterranean forests	PA	779	786	6.43	7.8	43.02	45.6	1.00899	3.11	42.05	24	37	79	279	419	0	2	0	0	1	2	0	1	2	4	0.0416667	0.0540541	0	0.00358423	0.00954654	1	2571	2570	419.913	373.277	312	-3	12.4	11.1	25.2	12.74	5.88	28.2	5	54.8	79.5
PA1216	57405.9	12	Northwest Iberian montane forests	PA	496	183	-4.86	-1.93	41.17	42.88	0.368952	-2.7	42.03	17	32	72	214	335	0	0	0	0	0	1	0	3	0	4	0	0.03125	0	0.0140187	0.0119403	160	2421	2261	892.401	304.281	857	-0.1	15.6	9	24.2	11	5.93	24.3	4.6	42.2	44.6
PA1217	39583.8	12	Pindus Mountains mixed forests	PA	232	435	22.62	22.8	38.54	42.46	1.875	21.26	39.66	14	32	75	229	350	0	0	0	0	0	2	0	3	0	5	0	0.0625	0	0.0131004	0.0142857	48	2461	2413	967.363	406.516	920	-2.8	15.9	6.8	24	10.37	6.93	26.8	12.8	58	60
PA1218	13094.8	12	South Appenine mixed montane forests	PA	150	161	16.34	16.84	40.7	40.95	1.07333	15.84	40.23	12	16	53	167	248	0	0	0	0	0	0	0	2	0	2	0	0	0	0.011976	0.00806452	62	3226	3164	908.451	343.2	874	2	17.8	8.6	23.8	12.24	6.07	21.8	8.6	63.3	25.5
PA1219	2867.85	12	Southeastern Iberian shrubs and woodlands	PA	205	121	-1.3	-0.69	37.65	37.92	0.590244	-1.85	37.3	7	24	39	194	264	0	0	0	0	1	0	0	0	0	1	0.142857	0	0	0	0.00378788	1	1281	1280	189.788	182.124	146	8.4	23.9	11.4	25.5	16.93	5.35	17.1	2.1	31.9	8.2
PA1220	76475.4	12	Southern Anatolian montane conifer and deciduous forests	PA	597	269	36.19	37.28	36.75	38.54	0.450586	34.68	37.33	0	0	81	241	322	0	0	0	0	0	0	0	2	0	2	#N/A	#N/A	0	0.00829876	0.00621118	1	3627	3626	1307.22	565.414	1319	-9	13.4	10	28.1	11.31	7.6	37.1	0	44.1	16.8
PA1221	71123.3	12	Southwest Iberian Mediterranean sclerophyllous and mixed forests	PA	502	519	-9.49	-3.83	36.02	40.72	1.03386	-8.27	38.37	17	28	61	245	351	0	0	0	0	0	0	0	1	0	1	0	0	0	0.00408163	0.002849	1	1857	1856	177.267	163.865	136	7.2	20.7	12.5	26.9	16.61	5.03	19.7	0.5	78.8	15.2
PA1222	85084	12	Tyrrhenian-Adriatic Sclerophyllous and mixed forests	PA	282	297	17.83	18.52	44.95	45.24	1.05319	16.05	39.23	21	38	70	210	339	1	2	0	0	5	6	0	2	3	13	0.238095	0.157895	0	0.00952381	0.0383481	1	1722	1721	305.768	260.178	245	3.9	20.1	12.2	26.1	15.34	5.71	22.2	0.1	58.2	88.3
PA1301	13682.5	13	Afghan Mountains semi-desert	PA	214	132	70.32	70.89	35.89	37.08	0.616822	67.96	35.2	0	0	36	24	60	0	0	0	0	0	0	0	0	0	0	#N/A	#N/A	0	0	0	1143	5519	4376	2897.73	704.819	2777	-16.4	7	-1	24.8	5.13	8.61	41.2	0	58.7	14.1
PA1302	674352	13	Alashan Plateau semi-desert	PA	1404	1079	93.49	110.44	36.13	45.71	0.768519	101.96	40.92	10	36	74	355	475	1	0	0	0	1	0	0	1	1	2	0.1	0	0	0.0028169	0.00421053	679	4292	3613	1354.97	361.895	1309	-17.8	10.1	-5.7	27.2	6.51	12.44	45	0.1	8.7	2.2
PA1303	1.84746e+06	13	Arabian Desert and East Sahero-Arabian xeric shrublands	PA	2270	1918	58.2	59.34	31.14	33.78	0.844934	45.95	25.17	0	0	80	311	391	0	0	0	0	0	0	1	2	0	3	#N/A	#N/A	0.0125	0.00643087	0.00767263	-407	2575	2982	495.109	337.675	451	6.1	23.2	21.5	37.1	25.1	7.2	31	0	2	14
PA1304	39887.3	13	Atlantic coastal desert	PA	392	1067	-16	-13.19	23.55	27.16	2.72194	-16.35	22.37	4	19	34	94	151	0	0	0	0	0	1	0	0	0	1	0	0.0526316	0	0	0.00662252	1	175	174	61.0568	39.4149	63	17.3	25.6	22.1	31.7	23.92	2.86	14.4	0	3.8	0.3
PA1305	64089.4	13	Azerbaijan shrub desert and steppe	PA	477	338	44.66	50.35	38.81	41.83	0.708595	47.51	40.32	8	40	68	259	375	0	0	0	0	0	0	1	0	0	1	0	0	0.0147059	0	0.00266667	-28	2663	2691	279.181	337.029	171	-3.4	20.7	4.3	27.6	13.98	8.61	31	1.6	29.5	48.3
PA1306	133647	13	Badghyz and Karabil semi-desert	PA	754	430	60.88	69.31	34.65	38.52	0.570292	65.1	36.58	5	56	69	189	319	0	0	0	0	0	0	0	0	0	0	0	0	0	0	0	203	3102	2899	544.273	304.172	470	-4.7	20	4.5	32.1	16.05	9.17	36.8	0	35.3	1.6
PA1307	288424	13	Baluchistan xeric woodlands	PA	1222	1149	62.27	74.88	25.21	35.52	0.940262	68.58	30.37	4	33	98	116	251	0	2	0	0	1	10	0	2	2	13	0.25	0.30303	0	0.0172414	0.0517928	1	4606	4605	1117.47	609.899	1083	-10.2	12.4	18.4	38.2	19.93	7.87	48.4	0	6.9	42.6
PA1308	267976	13	Caspian lowland desert	PA	795	571	53.09	54.98	46.29	49.29	0.718239	49.75	46.71	5	48	91	234	378	0	0	0	0	0	0	0	0	0	0	0	0	0	0	0	-58	327	385	-8.60353	25.2125	-12	-11.3	24.1	7	30.4	10.12	11.96	41.7	0.2	10.9	24.4
PA1309	139333	13	Central Afghan Mountains xeric woodlands	PA	822	531	66.03	70.2	34.01	35.67	0.645985	65.54	33.31	0	0	59	153	212	0	0	0	0	0	0	0	0	0	0	#N/A	#N/A	0	0	0	559	4865	4306	2054.31	640.086	2060	-14.8	7.9	7.5	33.5	11.23	9.02	48.3	0	30.2	21.8
PA1310	663853	13	Central Asian northern desert	PA	1463	590	62.06	81.08	45.58	47.89	0.403281	65.65	45.05	3	36	92	202	333	0	0	3	0	0	0	0	4	3	4	0	0	0	0.019802	0.012012	-137	1760	1897	250.009	190.875	190	-14.3	21.3	-0.8	29.3	9.69	12.5	43.6	1	10.5	22.5
PA1311	88799.9	13	Central Asian riparian woodlands	PA	608	719	74.05	76.75	44.22	46.3	1.18257	61.89	40.86	3	42	71	204	320	0	1	0	0	0	1	0	1	1	2	0	0.0238095	0	0.00490196	0.00625	34	504	470	147.506	103.638	111	-11.3	24.8	4	30.4	11.24	12.19	41.7	0	15	10.9
PA1312	567376	13	Central Asian southern desert	PA	1122	770	60.18	68.15	37.74	44.43	0.686275	60.16	40.3	1	42	63	161	267	0	0	1	0	0	0	0	2	1	2	0	0	0	0.0124224	0.00749064	-89	1075	1164	162.567	88.7126	161	-7.2	26.1	4.7	31.9	14.76	11.01	39.1	0	12.1	6.8
PA1313	580655	13	Central Persian desert basins	PA	1280	995	48.97	63.1	36.39	37.7	0.777344	55.75	33.23	0	0	69	134	203	0	0	0	0	0	0	1	0	0	1	#N/A	#N/A	0.0144928	0	0.00492611	115	4071	3956	1202.26	492.743	1095	-5.3	20.4	12.5	34.5	17.36	9.09	39.8	0	12	23.8
PA1314	282368	13	Eastern Gobi desert steppe	PA	888	734	102.93	114.12	39.93	46.41	0.826577	105.51	43.17	4	21	60	219	304	0	0	0	0	0	0	1	0	0	1	0	0	0.0166667	0	0.00328947	688	2748	2060	1220.13	225.339	1179	-22.1	16.3	-10.2	24.8	3.57	14.01	46.9	0.2	16.2	2.1
PA1315	139714	13	Gobi Lakes Valley desert steppe	PA	634	342	96.19	104.32	43.99	47.05	0.539432	100.26	45.52	1	9	0	148	158	0	0	0	0	0	0	0	0	0	0	0	0	#N/A	0	0	964	3877	2913	1732.44	390.757	1689	-24.8	11	-12.6	23.4	0.97	12.97	48.2	0.3	23.4	1.9
PA1316	157706	13	Great Lakes Basin desert steppe	PA	544	588	89.63	97.05	45.86	51.16	1.08088	93.34	48.51	0	7	51	274	332	0	0	0	0	0	0	0	0	0	0	#N/A	0	0	0	0	752	3848	3096	1490.54	428.516	1454	-31.7	7.9	-15.7	20.5	-2.5	15.8	52.2	0.8	27.7	21.3
PA1317	304938	13	Junggar Basin semi-desert	PA	1092	700	82.12	96.06	42.76	49.1	0.641026	89.09	45.93	3	12	84	144	243	0	0	0	0	0	0	0	1	0	1	0	0	0	0.00694444	0.00411523	165	3915	3750	838.671	463.675	715	-21.3	13.3	-8.9	28.9	5.68	14.09	50.2	0.1	8.3	19.6
PA1318	680441	13	Kazakh semi-desert	PA	2141	594	51.36	81.31	45.75	50.67	0.27744	66.33	48.21	5	27	81	175	288	0	0	0	0	0	0	0	1	0	1	0	0	0	0.00571429	0.00347222	-31	1163	1194	303.885	217.962	241	-18.2	18.9	-8.7	27.1	5.73	14.06	45.3	2.9	13.2	22.6
PA1319	26285.6	13	Kopet Dag semi-desert	PA	394	277	54.04	58.54	37.01	39.5	0.703046	54.77	38.25	3	48	62	167	280	0	0	0	0	0	0	0	0	0	0	0	0	0	0	0	-41	1112	1153	115.291	120.187	74	0.9	28.7	6.3	31.7	17.17	9.72	30.8	0.8	23.2	6.5
PA1320	210908	13	Mesopotamian shrub desert	PA	921	462	40.52	46.14	36.34	36.62	0.501629	40.23	33.49	0	0	59	283	342	0	0	0	0	0	0	0	2	0	2	#N/A	#N/A	0	0.00706714	0.00584795	14	1399	1385	418.193	257.088	378	3.5	24.7	12.2	35.9	20.06	8.78	32.4	0	11	0.8
PA1321	1.67378e+06	13	North Saharan steppe and woodlands	PA	4530	2088	31.24	32.77	32.22	34.8	0.460927	-10.26	26.37	6	64	74	223	367	0	0	0	0	0	6	0	0	0	6	0	0.09375	0	0	0.0163488	-82	1995	2077	366.411	216.822	314	7.1	25	22.4	36.1	22.21	6.51	29	0	1.2	13.4
PA1322	92608.7	13	Paropamisus xeric woodlands	PA	940	413	62.36	72.78	34.45	38.2	0.439362	67.57	36.33	0	0	56	147	203	0	0	0	0	0	0	0	0	0	0	#N/A	#N/A	0	0	0	334	5800	5466	1864.87	881.977	1764	-15.7	8.1	3.1	31.2	10.22	9.05	46.9	0	51.2	13.5
PA1323	72517.6	13	Persian Gulf desert and semi-desert	PA	349	722	51.11	53.03	29.59	30.37	2.06877	48.51	27.12	0	0	38	223	261	0	0	0	0	0	0	0	0	0	0	#N/A	#N/A	0	0	0	1	324	323	125.078	91.0248	117	11.6	34.3	18	36.8	25.94	8.21	25.2	0	13.5	0
PA1324	192147	13	Qaidam Basin semi-desert	PA	956	378	88.28	99.1	36.11	39.52	0.395397	93.69	37.82	0	0	37	91	128	0	0	0	0	0	0	0	0	0	0	#N/A	#N/A	0	0	0	2241	5709	3468	3330	633.34	3127	-21.2	4.4	-9.2	18.3	0.44	10.03	39.5	0.2	6.5	2.7
PA1325	649658	13	Red Sea Nubo-Sindian tropical desert and semi-desert	PA	2537	1692	46.65	58.16	30.04	31.83	0.666929	41.81	22.48	0	0	56	278	334	0	0	0	0	0	0	0	1	0	1	#N/A	#N/A	0	0.00359712	0.00299401	-162	2508	2670	725.192	342.314	779	6.7	24.3	23.3	36.3	24.4	5.98	29.6	0	1.3	22.6
PA1326	276999	13	Registan-North Pakistan sandy desert	PA	676	663	59.97	67.08	27.18	33.14	0.980769	63.53	30.16	0	23	56	233	312	0	3	2	0	0	5	0	3	5	8	#N/A	0.217391	0	0.0128755	0.025641	425	2805	2380	874.781	318.06	822	-0.6	24.4	13.1	36.4	20.85	9.01	37	0	11.3	3.1
PA1327	4.62942e+06	13	Sahara desert	PA	4609	1604	-9.64	35.38	16.75	30.46	0.348015	12.87	23.6	8	62	58	249	377	0	0	0	0	0	2	0	0	0	2	0	0.0322581	0	0	0.00530504	-101	1721	1822	432.051	195.177	415	8.4	24.4	21.4	37.5	24.5	6.76	29.1	0	0	8.3
PA1328	350889	13	South Iran Nubo-Sindian desert and semi-desert	PA	1906	1001	64.22	65.58	26.78	33.44	0.525184	58.66	29.23	0	0	76	289	365	0	0	0	0	0	0	4	1	0	5	#N/A	#N/A	0.0526316	0.00346021	0.0136986	1	3401	3400	563.961	471.905	498	2.5	24.2	19.8	36.9	23.8	6.97	34.4	0	14.8	6.5
PA1329	1.09825e+06	13	South Saharan steppe and woodlands	PA	5054	1249	-12.02	36.85	15.43	22.97	0.247131	-4.98	19.2	6	54	76	260	396	0	0	1	0	0	0	0	4	1	4	0	0	0	0.0153846	0.010101	104	2129	2025	431.492	144.116	411	13.6	27.7	22.5	36.3	27.97	5.29	22.7	0	0.2	3.5
PA1330	742657	13	Taklimakan desert	PA	1770	826	74.65	95.97	36.23	43.42	0.466667	85.31	39.83	4	32	60	260	356	0	0	0	0	0	0	1	2	0	3	0	0	0.0166667	0.00769231	0.00842697	-152	5897	6049	1259.53	576.438	1138	-23.4	8.5	-4.2	33.4	10.18	12.09	56.8	0	2.9	11.4
PA1331	82009.4	13	Tibesti-Jebel Uweinat montane xeric woodlands	PA	417	415	24.78	25.27	22.27	23.09	0.995204	17.66	21.23	0	15	38	77	130	0	0	0	0	0	0	0	0	0	0	#N/A	0	0	0	0	507	3398	2891	1329.31	451.139	1214	5	21.8	16.4	32.1	20.87	6.53	27.1	0.1	3.8	23.2
PA1332	257450	13	West Saharan montane xeric woodlands	PA	816	508	11.22	12.55	24.33	26.73	0.622549	6.67	24.45	6	34	53	74	167	0	0	1	0	0	1	0	1	1	2	0	0.0294118	0	0.0135135	0.011976	174	2885	2711	1082.03	330.991	1092	7.6	25	21.1	35.3	23.06	6.71	27.7	0	0.8	12.8
PA1333	59196.6	13	Red Sea coastal desert	PA	509	1098	37.25	37.32	27.77	29.58	2.15717	34.78	24.64	6	32	46	105	189	0	0	1	0	0	0	0	1	1	1	0	0	0	0.00952381	0.00529101	1	2055	2054	374.392	299.357	315	8.9	25	22.9	34.9	23.57	4.98	26	0	0.6	4.2
Rock and Ice	1.10972e+07	99	Rock and Ice	NT	4140	3913	96	180	80.76	82.91	0.945169	0	-78.73	0	0	0	0	0	0	0	0	0	0	0	0	0	0	0	#N/A	#N/A	#N/A	#N/A	#N/A	1	8752	8751	2570.38	771.448	2707
[truncated: 64 more columns]
